# Supplementary material for: Mycobacterium tuberculosis canonical virulence factors interfere with a late component of the TLR2 response
Source: eLife. 2021 Nov 10;10:e73984. doi: 10.7554/eLife.73984 (PMC8610422; doi:10.7554/eLife.73984)
Supplement: Supplementary file 1. [file elife-73984-supp1.xlsx]

## Sheet: fpkm
	Uninfected.1	uninfected.2	uninfected.3	H37Rv.4hrs.1	H37Rv.4hrs.2	eccCa1.4hr.1	eccCa1.4hr.2	eccCa1.4hr.3	Dmas.4hr.1	Dmas.4hr.2	Dmas.4hr.3	Rv.8hr.1	Rv.8hr.2	eccCa1.8hr.1	eccCa1.8hr.2	eccCa1.8hr.3	Dmas.8hr.1	Dmas.8hr.2	Dmas.8hr.3	Rv.12h.1	Rv.12h.2	eccCa1.12hr.1	eccCa1.12hr.2	Dmas.12hr.1	Dmas.12hr.2	Rv.16h.1	Rv.16h.2	Rv.16h.3	eccCa1.16hr.1	Dmas.16hr.1	Dmas.16hr.2	Dmas.16hr.3
1110019D14Rik	1.16	1.72	1.29	1.25	1.24	1.28	0.8	1.55	1.36	1.87	1.61	2.53	3.38	3	2.44	3.08	2.06	2.23	3.1	2.52	2.88	3.42	4.19	2.71	2.44	2.07	3.15	3.13	3.06	2.55	2.96	3.5
1110034G24Rik	2.18	1.9	3.07	2.82	2.77	3.85	2.29	2.78	3.08	1.59	3.49	4.65	3.91	4.21	4.27	4.71	4.67	4.42	3.89	3.9	4.31	4.73	4.38	3.67	3.71	4.08	4.44	5.44	4.19	4.62	4.26	3.98
1600014C10Rik	3.51	3.67	3.16	3.35	3.01	3.4	2.8	3.2	3.4	3.41	3.73	5.41	5.94	3.86	4.59	4.07	4.56	5.87	5.03	9.54	10.13	4.66	3.81	7.4	6.88	17.96	16.43	16.63	5.45	9.55	11.21	10.04
2310039H08Rik	5.66	2.42	5.09	5.6	5.96	2.46	3.99	3.99	5.93	4.16	3.95	6.93	7.37	7.22	7.45	3.67	4.47	3.47	7.73	7.49	7.17	6.8	5.92	2.76	3.25	4.14	4.21	4.14	6.78	4.33	3.64	3.19
2310042D19Rik	0.97	0.85	0.81	0.88	0.77	1.04	0.9	0.76	1.3	0.81	0.92	1.09	1.1	0.83	1	0.88	0.78	0.97	0.86	1.77	1.5	1.29	1.13	1.72	1.48	2.7	2.06	2.05	1.17	1.6	1.8	2.35
2610018G03Rik	2.65	3.27	3.64	3.1	3.2	3.01	2.74	2.9	2.82	2.71	2.68	1.41	1.56	1.19	1.42	1.24	1.44	1.51	1.93	1.82	1.49	1.16	1.6	2.04	1.45	1.71	0.91	1.44	1.42	1.72	1.84	1.83
2610318N02Rik	8.47	7.82	8.65	9.18	9.83	9.69	9.39	10.08	9.28	9.61	10.33	11.04	9.35	9.71	9.74	8.82	8.84	10.66	9.98	7.17	6.35	7.1	6.47	6.18	5.69	3.97	2.64	4.76	5.01	4.67	6.91	5.01
2700097O09Rik	1.78	2.42	2.45	2.29	2.41	2.15	2.41	2.14	2.43	1.5	2.2	3.57	4.09	3.2	4.49	4.92	3.89	4.15	2.82	3.34	4.46	6.62	3.96	5.1	5.32	3.22	3.87	2.94	4.2	4.21	5.11	4.33
2900026A02Rik	14.73	13.32	14.87	13.23	14.39	11.06	12.3	12.24	13.88	12.91	14.07	9.45	9.47	7.4	7.68	6.16	9.78	9.59	9.02	8.91	8.38	5.52	7.15	8.26	8.29	7.85	7.69	7.75	7.38	7.75	6.79	8.28
4930523C07Rik	2.2	2.09	2.17	2.07	2.28	1.83	2.17	1.85	1.84	1.47	1.55	1.33	1.29	1.28	1.07	1.23	1.36	0.92	1.45	1.27	1.23	0.89	0.95	1.21	1.22	1.15	1.08	1.12	1.21	1.34	1.46	1.49
4931414P19Rik	1.19	1.32	1.5	1.17	1.42	0.88	1.01	0.83	1.02	1.18	1.26	1.89	1.78	1.59	1.25	1.37	1.48	1.88	2	2.39	2.29	2.52	1.72	1.7	2.08	2.4	2.81	2.75	2.17	2.37	2.81	1.79
4933412E12Rik	1.76	2.47	1.98	2.19	1.8	2.4	1.96	1.72	1.58	2.19	2.43	2.52	2.48	2.01	1.68	2.22	1.88	2.38	2.03	3.83	3.93	3.67	1.35	3.15	3.18	6.82	7.16	5.29	2.36	3.7	4.87	4.08
9430008C03Rik	2.94	4.26	3.67	3.68	3.85	4.77	3.92	3.68	4.18	4.1	4.05	2.85	2.48	4.12	3.12	3.01	2.55	2.41	2.96	2.39	1.99	2.6	2.81	2.87	2.47	1.7	1.63	1.38	1.97	1.95	1.5	1.9
9930111J21Rik1	6.42	6.22	6.79	5.91	5.48	5.23	5.01	4.82	6.15	5.53	6.11	11.52	14.15	5.98	6.15	6.96	9.73	10.42	10.69	23.05	23.14	8.66	8.87	15.2	13.78	40.25	37.97	36.75	12.15	22.12	25.97	23.42
A230050P20Rik	1.43	1.28	1.46	1.14	1.77	1.45	1.33	1.3	2.23	1.48	1.11	1.73	1.57	1.07	1.39	1.23	1.3	1.04	1.95	2.75	2.15	1.38	1.13	1.81	1.08	3.54	2.91	2.97	1.42	2.36	1.57	1.72
A530032D15Rik	1.17	1.61	1.22	1.23	1.12	1.31	1.03	1.19	1.26	1.59	1.22	1.33	1.78	1.41	1.02	1.16	1.65	1.69	1.59	3.1	2.91	1.18	1.28	1.79	1.97	4.27	4.4	4.15	1.33	2.89	3.18	2.47
A530064D06Rik	3.53	3.01	3.13	3.09	2.4	2.76	2.35	2.95	2.58	3.03	2.25	2.77	3.48	2.12	1.97	2.33	2.42	2.49	2.77	5.02	5.44	3.08	3.19	3.72	4.24	6.55	6.91	6.85	4.12	4.51	4.93	5.26
Aacs	25.79	23.7	25.15	25.27	24.47	21.71	23.22	23.93	26.45	25.51	26.9	12.95	12.3	11.65	12.8	11.97	12.8	12.33	13.12	11.92	11.83	10.04	11.15	10.79	10.08	13.75	12.93	12.99	12.54	12.21	12.02	10.71
Aatk	1.83	1.74	1.52	1.62	1.7	1.3	1.15	1.23	2	1.68	1.36	0.94	1.08	0.88	1.07	0.6	0.84	0.86	1.13	1.02	1.22	0.68	0.84	1.1	0.94	1.29	1.19	1.36	1.28	1.47	1.05	1.01
Abcg1	1.49	1.6	1.59	1.36	1.49	1.23	1.55	1.67	1.46	1.82	1.43	2.35	2.6	2.21	2.06	2.2	2.19	2.8	3	3.74	4.18	2.8	3.1	3.47	3.25	6.8	7.31	7.06	4.88	5.7	6.49	4.68
Abhd15	2.72	3.07	2.41	2.51	2.66	1.43	1.47	1.53	2.24	2.84	2.73	2.09	1.83	1.31	1.33	0.91	2.23	1.56	1.63	2.33	2.34	1.15	1.49	1.88	1.47	3.67	3.44	3.9	2.98	2.7	2.76	2.88
Abi2	8.45	9.37	8.93	8.55	8.26	9.1	9.21	8.82	8.3	10.1	9.68	5.62	5.82	5.39	5.22	5.58	5.87	5.42	5.21	4.71	4.78	5.62	5.34	5.04	5.21	4.03	4.02	4.44	5.42	4.38	5.36	5.19
Acat2	20.25	22.38	21.53	20.87	22.26	20.4	23.11	21.63	20.7	21.89	21.95	14.24	13.86	12.36	12.98	13.63	14.54	14.18	13.99	11.06	10.81	10.32	10.75	12.43	12.59	12.85	12.77	12.84	13.9	13.09	14.01	14.24
Acat3	21.66	23.89	21.89	22.8	23.05	20.59	23.73	24.6	22.34	22.84	22.04	21.27	20.82	21.83	23.3	24.73	22.15	20.93	20.54	19.18	18.71	23.07	21.47	21.43	22.07	15.78	19.39	18.16	21.48	22.08	20.65	18.79
Acsbg1	6.15	5.97	5.23	4.89	5.5	5.74	5.4	5.58	5.49	5.04	6.2	6.05	5.34	5.53	5.76	5.31	6.05	6.43	4.54	4.9	4.61	5.9	4.58	4.04	5.09	2.18	2.27	2.47	3.2	2.74	2.88	3.12
Acsl1	26.91	29.8	28.56	31.43	31.85	39.29	38.86	39.18	27.23	27.52	28.99	37.97	38.14	59.26	59.54	62.7	40.08	40.54	41.95	41.78	39.91	67.07	58.87	45.24	49.44	42.02	42.65	39.95	43.45	48.9	51.77	46.19
Acsl3	7.91	8.8	7.61	7	8.2	6.8	7.15	7.08	7.49	8.53	8.15	3.83	3.95	3.88	3.95	3.78	4.44	3.67	4.07	4.94	4.48	4.25	4.41	4.81	5	5.45	5.42	4.9	5.18	4.64	5.12	5.44
Acy1	1.11	2	1.89	1.3	1.62	1.16	1.45	1.3	1.54	1.2	1.36	2.64	2.38	3.97	3.28	3.74	2.48	2.77	3.16	3.32	3.3	6.5	5.72	3.68	4.02	2	1.92	2.61	5.16	2.9	3.59	3.41
Adap2	30.4	34.03	34.79	31.08	33.75	33.76	32.17	30.01	35.03	32.56	32.35	18.75	19.92	12.76	13.73	14.87	17.06	16.28	19.4	25.71	23.96	16.27	16.29	21.62	19.76	33.76	35.39	31.24	23.98	27.43	27.93	26.47
Adar	13.8	14.02	13.42	15.08	14.96	14.78	14.55	14.88	12.98	13.92	14.46	20.25	23.59	15.25	15.48	16.1	16.62	18.17	19.85	32.7	33.98	17.32	15.64	25.34	26.12	44.28	44.5	41.57	19.57	34.58	35.68	33.33
Adc	1.85	2.22	2.06	2.46	2.98	2.61	2.46	2.26	2.13	2.17	1.96	1.44	1.54	1.33	1.57	0.74	1.51	1.06	1.12	0.83	1.03	0.76	1.06	1.09	1	0.67	0.87	0.98	0.72	0.9	0.64	0.72
Adgb	0.56	0.73	0.66	0.82	0.81	0.81	0.85	0.67	0.7	0.66	0.6	0.7	0.76	1.13	1.01	1.25	0.97	0.81	0.66	1.39	1.13	2.45	2.04	1.42	1.45	1.92	1.85	2.14	2.29	2.13	2.27	2.25
Agrn	3.3	3.59	3.39	3.7	3.45	3.34	3.64	3.46	3.75	3.53	3.65	3.48	4	3.26	3.45	3.3	3.2	3.75	3.51	6.43	6.61	4.82	3.73	5.27	4.66	13.54	13.78	12.12	5.06	9.05	9.35	8.1
AI504432	9.49	9.58	9.57	10.38	9.99	11.91	10.75	10.69	11.05	10.69	10.53	6.91	7.21	8.48	7.8	8.26	7.27	7.27	6.75	5.44	4.54	5.74	5.2	6.14	6.39	2.87	3	3.26	3.3	3.62	3.51	4.24
AI607873	28.99	35.45	30.48	34.75	36.2	39.28	40.53	39.09	30.64	31.59	32.55	66.81	81.51	45.68	47.19	49.89	53.24	60.87	67.42	108.31	114.81	60.77	48.16	82.6	83.22	150.4	148.28	143.17	55.74	106.9	126.75	106.82
Aif1	28.55	38.35	36	36.3	38.8	31.7	37.17	37.27	31.29	30.99	30.53	29.75	29.39	29.76	28.11	31.14	30.96	30.25	33.72	39.31	41.87	45.84	37.22	37.45	40.12	72.25	78.41	70.31	59.23	53.86	69.26	55.83
Aim1	15.07	13.74	14.74	14.85	14.83	15.01	15.4	14.73	13.2	14.05	14.48	17.82	18.43	17.51	16.77	17.94	17.79	17.63	18.54	25.01	25.86	19.58	21.43	22.59	23.51	29.52	30.27	28.73	22.35	25.15	26.37	24.58
Ak4	1.16	1.08	1.42	1.15	1.05	1.35	1.31	1.25	1.14	0.97	1.38	9.52	9.17	11.35	11.48	12.66	8.93	9.2	8.25	7.36	8.2	12.12	11.67	8.46	9.47	3.87	3.7	4.21	6.11	5.49	5.15	6.19
Als2cl	2.89	2.88	2.54	3.04	3.04	3.25	2.76	2.83	3.62	3.07	2.86	1.55	1.7	1.53	1.44	1.24	1.36	1.48	1.32	1.72	1.65	2.44	1.46	1.58	1.59	1.73	1.96	1.97	1.89	1.88	1.79	2.13
Amd1	21.69	19.52	37.4	14.18	12.08	8.48	36.54	16.22	17.04	8.98	22.47	5.14	24.48	15.06	18.7	8.84	29.2	0	21.34	21.41	19.2	57.06	15.42	16.52	15	0	16.41	12.63	9.49	8.98	18.14	17.23
Amz1	2	1.61	1.97	2.02	2.05	1.64	1.92	1.58	2.17	2.09	2.43	1.2	1.2	0.9	1.05	0.69	1.15	1.31	1.22	1.27	1.11	0.53	1.19	1.29	1.21	0.96	1.15	1.37	1.13	1.16	1.21	1.33
Ang	15.61	13.84	16.23	15.05	14.27	10.4	13	13.08	15.29	12.77	13.93	9.13	8.09	7.5	7.17	5.99	9.6	11.32	8.96	6.98	7.6	3.46	3.4	6.17	7.91	7.31	7.65	7.63	5.2	5.16	5.98	7.65
Angpt2	0.73	0.97	0.86	0.76	0.73	0.59	0.63	0.68	0.55	0.84	0.88	1.22	0.92	0.93	0.9	1.24	1.15	0.68	1	1.33	1.52	1.4	1.42	1.13	1.49	1.72	1.73	1.77	1.54	1.53	1.68	1.9
Angptl2	110.85	100.61	103.82	100.57	100.35	86.07	94.39	89.95	105.69	107.43	106.65	79.14	80.81	64.93	66.39	66.16	81.78	79.9	76.7	76.59	75.44	52.24	59.78	63.75	69.27	56.5	56.12	55.53	48.59	51.08	47.79	51.24
Ankrd33b	6.08	6.38	5.85	6.42	6.19	6.56	7.31	6.73	5.85	5.63	4.95	2.44	2.12	2.3	2.13	1.98	2.35	2.21	2.28	2.26	2.17	2.51	2.8	2.16	2.82	2.21	2.6	1.83	2.68	2.65	2.52	2.62
Aoah	2.04	2.42	2.39	2.52	2.22	2.97	2.77	2.6	2.29	2.31	2.2	3.72	3.5	4.78	4.94	5.78	3.65	3.81	2.85	4.61	4.7	9.06	8.11	4.55	4.78	8.32	8.56	8.32	11.06	8.78	10.01	7.44
Apba1	1.47	1.72	1.42	1.59	1.54	1.37	1.48	1.45	1.63	1.35	1.51	0.65	0.83	0.54	0.73	0.59	0.59	0.64	0.63	0.96	1	0.53	0.72	0.84	0.91	1.52	1.26	1.31	0.93	1.07	1.12	0.82
Apobec3	19.4	22.78	25.18	25.37	24.36	26.3	27.9	28.51	20.59	21.5	22.09	27.93	30.57	27.26	28.31	30.65	27.65	27.49	30.33	35.88	36.92	29.38	28.02	33.7	35.97	48.66	46.77	46.66	28.17	37.83	41.13	36.54
Apoc2	7.51	6.95	7.12	6.43	6.17	4.52	6.55	5.95	5.14	5.62	5.77	4.42	4.92	4.23	5.44	4.17	5.02	5.22	4.32	5.1	3.71	1.2	2.91	2.84	3.84	8.57	7.57	4.94	4.59	6.02	6.4	6.71
Aqp9	3.61	3.33	3.48	2.87	3.11	3.18	3.2	3	3.18	3.33	3.85	2.04	2.04	1.58	1.73	1.83	1.96	2	1.65	1.97	1.66	2.14	1.54	1.77	1.72	0.76	0.76	1.07	0.93	0.86	1.26	1.2
Arap2	3.23	3.06	3.39	3.31	3.06	3.26	3.23	3.09	3.2	3.44	3.51	1.98	1.81	1.15	1.28	1.29	1.41	1.86	1.41	1.37	1.23	0.99	1.15	1.21	1.07	0.85	0.76	0.7	0.89	0.84	0.54	0.88
Arg1	3.23	2.01	2.56	2.26	2.31	1.92	2.38	2.7	2.36	2.13	2.45	5.07	5.09	4.48	5.18	5.21	3.99	5.46	4.66	4.54	5.93	5.11	4.1	4.35	4.86	4.8	5.14	4.96	4.04	3.97	3.75	4.43
Arhgap15	21.49	23.54	21.92	22.38	21.64	20.3	23.31	21.16	20.59	19.93	19.57	11.56	11.27	10.2	10.49	11.16	13.59	13.46	12.91	10.33	9.98	6.84	6.72	10.97	11.14	10.96	12.22	11.43	7.89	9.36	10.35	10.02
Arhgap23	2.47	2.86	2.94	2.4	2.66	2.44	2.32	2.41	2.34	2.77	1.95	1.51	1.67	1.75	1.26	1.53	1.41	1.69	1.46	1.79	1.7	1.5	2.15	1.03	1.42	1.58	1.43	1.51	1.8	2.04	1.74	1.39
Arhgap24	4.45	4.31	5.35	5.08	4.74	4.24	4.57	5.09	4.74	4.91	5.38	3.63	3.74	3.2	3.14	2.83	3.5	4.35	3.49	3.15	3.1	1.69	2.15	2.74	2.3	3.5	2.97	3.66	2.53	2.92	2.81	3.34
Arhgap33	1.96	2.53	2.51	2.35	2.11	2.03	1.86	2.24	2.62	2.38	2.14	1.46	1.1	1.51	1.54	1.39	0.94	1.1	1.52	1.36	1.29	0.87	1.61	1.65	1.1	0.95	0.97	1.03	1.47	0.95	0.91	1.53
Arhgef40	2.45	2.6	2.53	2.28	2.61	2.06	1.76	2.15	2.74	2.48	2.37	1.77	1.74	1.45	1.29	1.24	1.57	1.68	1.82	1.84	1.7	0.63	1.21	1.62	1.48	1.29	1.33	1.42	1.45	1.63	1.73	1.8
Arid5a	1.83	1.89	1.57	1.9	1.88	1.76	1.78	1.97	1.58	1.45	1.52	1.11	1.15	0.83	0.8	0.86	0.93	0.86	1.02	0.95	0.89	0.62	0.99	0.96	0.86	0.84	0.85	0.75	0.61	0.67	0.7	0.65
Arl2bp	31.66	35.14	32.85	34.93	34.58	30.98	34.83	32.08	28.5	35.75	29.62	20.97	18.33	19.92	20.24	19.68	20.49	22.38	21.77	20.16	18.63	20.12	17.02	19.62	19.4	15.99	16.43	14.4	18.11	17.01	15.83	17.24
Arl4c	52.71	50.17	50.36	49.77	48.01	43.67	47.25	45.73	49.77	49.84	45.22	38.26	37.58	30.56	29.95	28.68	37.57	35.71	37.47	38.01	35.73	22.54	27.25	34.43	32.13	34.69	34.1	35.03	30.81	31.21	30.35	31.49
Arl5c	3.45	4.8	4.07	5.09	4.26	5.93	6.91	6	3.95	4.1	3.65	5.12	4.78	9.89	8.26	10.04	5.16	4.79	5.45	5.63	6.38	12.28	9.54	7.77	9.07	6.92	6.96	7.07	8.5	9.39	9.87	8.16
Asah2	2.55	2.45	2.32	2.26	2.36	2.02	2.51	2.55	1.88	2.19	1.89	2.19	2.09	1.81	1.88	1.98	2.5	2.24	1.84	2.74	2.67	1.53	1.76	1.78	2.68	4.8	4.6	4.49	2.02	3.11	3.24	3.33
Asap2	1.9	2.08	1.81	1.67	2.21	1.69	1.71	1.84	1.79	1.71	1.94	0.74	0.66	0.79	0.69	0.64	0.72	0.65	0.63	0.74	0.64	0.66	0.69	0.91	0.64	0.63	0.39	0.37	0.65	0.5	0.36	0.66
Asb13	2.78	2.45	3.36	2.72	3.23	2.99	3.26	2.84	2.98	2.8	2.75	2.71	3	2.38	2.22	2.18	2.4	2.58	2.69	3.82	4.54	1.66	2.61	4.03	3.24	7.73	7.42	6.9	2.71	4.78	5.95	3.91
Ascc3	9.53	10.05	9.83	9.22	9.1	9.56	10.13	9.4	9.09	9.42	10.34	13.36	14.31	12.74	12.44	13.44	13.03	13.66	13.14	18.82	18.48	12.95	12.93	15.26	15.85	24.16	23.52	23.17	12.73	17.91	17.71	17.85
Ass1	7.22	5.25	12.53	7.6	7.93	5.53	4.14	12.51	2.83	3.67	6.62	11.35	8.79	12.39	16.61	19.57	17.42	14.87	15.06	27.38	19.09	19.86	23.8	24.35	30.38	36.95	30.94	31.93	26.03	29.64	38.03	31.53
Athl1	2.39	2.85	3.07	2.68	3.32	2.96	3.01	3.01	3.03	2.76	2.68	3.68	4.34	3.59	3.81	3.41	3.15	4.02	4.89	4.37	5.39	5.38	5.1	4.84	5.49	8.28	8.2	7.19	5.99	6.78	6.69	5.98
Atm	3.45	3.07	3.12	3.16	3.19	3.58	3.17	3.22	3.53	3.48	4.03	6.42	6.35	6.61	6.59	6.39	6.75	6.41	6.58	5.19	5.02	6.81	5.81	5.87	5.39	4.61	4.78	5.3	5.92	5.21	4.83	6.07
Atp10a	2.46	2.78	2.78	2.63	2.5	2.42	2.39	2.64	2.14	2.25	2.55	2.82	2.85	2.38	2.47	2.39	2.63	2.65	2.61	5.15	5.42	3.9	3.59	4.36	4.05	6.94	7.29	6.77	3.17	4.93	4.98	4.57
Atp2a3	9.89	10.06	11.15	10.31	10.5	9.49	10.24	9.88	10.8	9.93	9.9	7.35	7.46	6.41	7.38	6.65	8.06	7.62	7.48	6.51	6.35	4.48	4.94	6.36	6.51	5.41	4.5	4.7	3.94	4.56	4.67	4.66
Atp6v0a1	65.95	64.68	67.33	64.53	65.23	59.31	61.31	61.65	69.2	69.77	70.63	31.61	32.07	25.86	26.81	24.7	32.98	31.26	29.28	32.26	30.83	22.98	24.36	28.39	28.93	31.3	30.9	31.2	29.95	28.48	27.6	29.68
AW112010	1.38	2.13	1.16	1.86	1.51	1.47	1.99	1.38	1.38	1.22	1.01	1.82	1.9	1.66	2.57	1.77	1.73	1.88	1.73	5.33	4.15	3.61	2.54	2.39	2.37	8.46	11.51	10.46	3.38	7.84	7.53	5.72
Azi2	15.8	16.01	15.7	16.06	16.5	15.66	16.03	15.61	16.43	16.29	16.39	16.88	18.43	15.18	15.43	16.67	16.08	16.53	16.8	21.36	23.06	18.88	18.01	20.69	19.18	30.67	30.83	28.4	18.13	24.72	26.14	22.58
B230120H23Rik	11.11	10.5	10.58	10.67	11.03	11.21	12.41	9.72	9.15	10.33	9.9	9.14	8.33	8.15	8.14	8.46	9.25	8.87	8.41	6.49	6.94	7.98	7.36	7.78	7.27	5.31	4.79	4.9	7.36	5.64	6.04	6.31
B2m	1265.8	1367.68	1354.22	1346.93	1335.14	1253.75	1419.39	1375.39	1247.18	1329.15	1377.24	1362.36	1412.69	1317.23	1387.84	1449.2	1427.39	1460.42	1385.1	1719.46	1783.87	1470.6	1460.86	1520.07	1640.28	2518.34	2569.4	2482.59	1641.8	2256.29	2293.06	2019.52
B3galnt1	16.75	19.2	16.91	16.25	17.45	12.51	14.91	13.37	14.96	16.71	17.57	6.33	5.95	4.68	5.27	6.02	7.63	6.5	6.47	7	6.78	5.99	5.49	6.9	5.35	9.38	9.38	8.61	8.03	7.86	8.06	7.69
B3gnt7	2.58	3.26	3.41	2.78	3.39	2	2.56	2.24	2.6	3.4	2.54	1.12	0.89	0.74	0.95	0.65	1.12	1.25	0.92	0.98	0.69	0.76	0.82	0.92	0.91	0.54	0.51	0.48	0.6	0.45	0.43	0.75
Bambi-ps1	2.77	2.07	2.28	2.25	2.84	2.64	2.18	2.24	1.12	2.21	1.69	2.88	3.76	1.53	2.13	1.81	3.63	2.36	3.04	5.33	4.86	3.21	3.29	4.32	3.72	6.79	6	8.63	3.59	5.48	5.63	4.09
Batf2	0.27	0.71	0.22	0.72	0.66	0.55	0.5	0.69	0.5	0.3	0.61	1.36	1.49	0.89	1.01	0.44	1.71	1.01	0.78	2.37	2.61	1.11	1.6	1.41	1.84	4.9	5.17	3.97	1.26	3.15	4.09	2.25
Bbs2	0.64	0.82	0.86	0.86	0.7	0.9	0.78	0.75	0.7	0.76	0.72	1.28	1.12	1.5	1.18	1.3	1.21	1.5	1.14	0.92	1.19	0.95	1.13	1.97	1.44	1.45	1.45	1.57	1.39	0.99	1.44	1.28
BC051226	2.5	2.05	2.87	2.33	3.43	3.2	1.89	2.48	3.62	2.2	3.24	2.8	3.51	2.39	2.31	1.59	4.27	1.83	3.26	4.51	5.85	1.62	2.81	4.32	2.24	9.1	8	8.62	2.92	5.66	6.42	3.32
BC094916	0.16	0.31	0.1	0.23	0.28	0.12	0.16	0.33	0.16	0.24	0.15	1.54	2.32	0.45	0.55	0.54	0.84	1.05	1.5	7.74	8.33	1.31	0.71	2.34	3.02	24.31	23.93	21.31	1.24	7.59	11.6	6.85
BC147527	0.09	0.17	0.12	0.25	0.07	0	0.18	0.25	0.1	0.34	0.09	0.49	0.78	0	0.11	0.25	0.34	0.5	0.63	2.6	2.64	0.36	0.32	1.4	0.96	7.33	7.26	6.77	0.49	2.31	3.79	2.3
Bcl2	2.94	3.27	2.95	2.9	2.93	2.74	2.73	2.95	3.13	2.65	3.4	2.85	2.71	2.53	2.17	2.21	3.01	2.95	2.5	2.34	2.13	1.68	1.72	2.05	2.46	1.24	1.15	1.23	1.41	1.44	1.43	1.42
Bcl2a1a	13.12	15.61	14.22	14.43	14.51	16.5	18.48	17.68	13.17	14.08	15.5	7.87	8.59	14.32	14.94	17.01	9.52	11.38	9.46	8.65	8.01	17.74	14.1	8.99	10.08	8.93	9.09	7.71	9.2	9.65	12.58	9.73
Bcl2l1	55.72	57.42	58.23	56.91	55.22	50.26	51.71	50.98	55.5	58.57	54.36	36.68	37.94	27.51	29.81	28.76	35.24	34.56	33.88	40.19	38.31	25.79	26.47	33.95	31.02	32.87	29.66	30.29	23.8	26.36	24.97	25.04
Bcor	8.48	9.76	9.07	9.31	10.24	11.14	10.81	10.42	8.82	8.95	8.82	4.75	4.77	5.09	4.95	5.16	5.08	5.02	5.55	4.85	5.09	6.23	6.11	5.2	5.66	4.14	4.36	3.83	5.27	4.94	4.75	5.08
Bend3	1.96	2.01	1.72	1.88	2	1.95	1.77	1.9	1.65	1.62	1.57	2.09	2.27	2.52	2.6	2.15	1.98	2.02	2.45	1.43	1.29	1.52	2.17	1.46	1.62	0.77	0.84	0.91	1.28	1.11	0.84	1.03
Bmf	2.26	1.82	2.65	2.17	2	1.73	1.85	1.72	2.16	2.35	2.03	2.35	2.05	1.48	1.88	2.13	2.56	2.35	2.41	2.85	2.8	2.19	2.97	3.14	3.03	5.15	4.97	4.94	5.45	4.89	5.06	5.55
Bmp2k	11.45	11.42	11.33	10.88	12.33	9.52	10.43	10.11	10.09	10.49	10.53	6.98	7.12	5.75	5.48	5.59	6.97	6.87	6.66	6.45	6.1	4.82	5.48	6.17	6.27	6.86	6.17	6.48	6.22	5.97	5.49	6.08
Bnip3	29.17	28.11	28.69	25.79	27.69	25.75	28.22	28.66	25.01	26.7	29.21	90.53	85.44	100.79	97.48	102.5	84.22	87.21	85.79	82.45	82.78	101.29	95.33	81.46	86.33	47.65	49.9	50.79	62.49	60.02	59.59	59.78
Bst2	115.25	134.66	134.84	128	128.9	99.64	113.95	115.67	136.26	114.65	110.19	153.43	169.49	119.4	134.16	114.12	131.45	138.57	143.98	282.76	295.74	126.58	131.63	175.52	161.9	620.04	642.79	601.2	173.34	346.67	407.48	284
Btbd11	1	0.89	1.18	0.97	0.95	1.13	1.21	1.31	0.85	1.16	1.21	1.7	1.82	2.29	2.15	1.8	1.78	2.14	1.39	1.93	2.14	2.32	3.38	2.14	1.84	1.97	2.01	2.24	3.51	2.54	2.97	2.44
C130026I21Rik	1.31	1.76	1.51	1.46	1.37	1.65	1.49	1.55	1.66	1.73	1.61	1.97	2.54	1.56	1.53	1.61	1.71	2.04	1.99	3.55	3.79	1.33	1.48	2.74	2.57	6.12	5.74	6.21	1.64	4	3.89	3.21
C3	3.28	4.11	3.22	3.89	3.66	4.29	5.06	5	3.11	3.03	3.51	5.34	5.57	7.57	7.79	8.55	4.87	4.99	6.31	12.63	11.35	18.09	14.66	11.57	13.32	26.96	28.23	25.38	22.24	27.19	29.03	24.81
C77080	11.08	10.66	11.07	10.64	10.27	8.5	9.31	9.45	11.93	10.55	9.85	3.65	3.9	3.56	2.89	2.73	3.51	3.49	3.83	4.45	4.32	3.94	3.77	3.71	3.66	5.02	4.68	4.65	5.6	5.43	4.72	4.24
C920025E04Rik	26.84	30.85	29.89	30.27	30.21	25.91	30.8	29.36	30.77	28.82	29.83	27.78	30.02	25.51	26.87	27.73	28.61	29.87	30.83	37.75	40.66	29.95	27.01	30.09	30.55	62.67	63.83	57.77	28.98	40.82	47.81	40.91
Cacng8	1.48	1.19	1.07	0.82	1.01	1.04	2.03	1.82	1.62	0.97	1.49	2.44	2.01	2.53	2.32	1.94	2.41	1.23	2.48	2.14	2.1	2.88	3.75	2.68	2.04	1.67	2.57	2.43	2.76	3.38	2.26	2.58
Calcrl	43.36	41.06	42.54	40.02	38.77	46.13	43.94	48.57	38.27	41.12	44.46	82.8	82.29	95.25	97.55	101.71	83.41	83.92	80.13	61.48	64.79	87.07	80.8	61.78	67.72	45.78	47.47	49.48	56.69	55.1	56.25	55.14
Calr	507.24	528.91	519.98	512.51	522.58	482.26	530.83	515.69	524.29	520.69	523.21	680.1	682.89	661.06	667.99	686.26	708.77	719.09	715.21	801.38	835.92	736.3	780.85	831.09	849.54	1015.05	1031.45	1055.35	834.6	955.97	971.29	908.67
Camkk2	17.62	17.09	19.48	19.57	18.71	20.02	19.49	20.06	19.18	18.88	17.68	22.84	23.21	23.88	23.89	21.25	20.46	21.56	23.05	29.17	30.62	24.34	25.45	25.68	27.18	34.93	35.15	34.22	26.75	32.77	32.29	29
Carhsp1	23.89	25.49	24.31	24.74	25.5	23.19	25.2	22.77	24.12	23.99	23.7	13.47	13.36	10.61	12.76	10.08	12.77	11.98	12.05	16.52	17	12.85	10.4	14.27	13.77	20.72	20.15	19.84	13.34	14.89	16.55	15.21
Casp1	45.24	42.02	40.88	41.26	43.55	41.4	45.06	43.43	38.2	42.05	44.84	49.67	51.97	41.71	43.85	48.47	46.1	50.77	50.18	70.3	73.77	60.08	52.85	65.69	68.09	97.78	95.76	92.6	59.65	80.21	89.06	79.02
Casp4	6.08	7.72	7.5	8.81	8.14	11.21	11.72	10.73	8.26	7.42	8.1	9.1	10.55	10.43	9.29	10.23	6.85	8.01	9.35	17.53	17.52	11.66	12.6	16.21	17.27	23.86	24.27	23.33	13.01	17.99	26.62	23.98
Cav1	15.78	17.24	17.97	20.21	16.95	26.71	24	26.9	15.78	18.12	20.27	73.41	75.99	104.26	106.2	120.28	73.87	75.86	81.57	81.01	87.98	141.32	137.66	90.89	97.58	82.47	85.51	83.08	145.56	119.37	126.55	112.11
Cbr2	3.47	5.21	4.18	4.66	5.01	4.25	4.07	4.92	3.64	3.54	4.51	1.98	3.65	1.41	2.47	2.77	3.85	3.52	3.1	2.47	2.4	2.22	2.12	2.04	1.61	2.31	2.64	2.74	1.9	2.04	1.71	2.79
Ccbl2	1.05	0.85	0.58	0.68	1.02	0.64	1.05	1.23	0.98	0.91	1.12	2.29	2.52	1.85	2.51	2.04	2.21	2.22	2.24	1.48	1.52	1.28	1.68	1.66	1.47	1.35	1.32	1.58	1.64	1.51	1.58	1.68
Ccl12	4.79	6.21	3.93	4.35	4.76	5.31	5.9	4.73	4.21	4.88	3.99	5.09	7.17	2.4	2.45	2.11	2.43	3.48	3.71	15.91	11.82	5.37	2.74	6.97	6.47	22.01	21.52	19.76	1.77	5.64	8.81	5.31
Ccl2	121.68	109.11	103.76	112.18	124.57	112.28	117.71	111.24	104.13	116.61	107.84	74.75	78.42	49.33	51.16	48.25	64.34	62.28	63.16	114.19	94.73	40.3	44.36	74.22	75.5	75.62	72.51	73.86	21.66	35.15	40.39	41.81
Ccl3	19.63	18.55	17.66	22.77	22.12	40.99	40.41	34.95	21.32	25.31	22.03	30.73	31.31	93.25	95.89	101.37	45.72	42.69	40.62	36.38	32.66	96.84	81.05	44.62	59.47	26.89	26.43	24.36	27.14	32.37	39.62	38.44
Ccl4	14.38	14.47	15.35	24.65	20.78	28.82	25.18	28.71	18.08	18.71	20.43	29.4	29.08	43.16	44.1	42.27	28.63	29.58	30.48	41.19	32.29	35.46	29.07	26.08	34.73	30.07	33.22	28.92	11.41	27.31	30.4	22.22
Ccl5	1.62	2.18	2.74	2.47	1.21	3.52	4.11	4.8	3.41	3.3	2.89	5.04	4.8	12.34	10.41	12.2	3.45	6.24	6.45	16.33	10.39	21.01	15.27	7.88	11.48	28.91	27.88	23.73	17.22	21.13	23.6	14.66
Ccl7	19.45	20.73	14.62	21.54	22.9	18.38	21.66	18.65	15.34	18.74	18.25	10.22	11.33	4.04	4.76	4.25	7.74	7.08	9.06	15.87	15.03	2.17	3.22	7.48	8.92	15.96	13.72	16.15	2.49	6.41	6.46	5.99
Ccnd2	6.4	7.05	6.92	6.41	7.1	6.4	6.76	6.26	6.54	6.92	6.96	5.96	7.04	4.39	3.9	3.33	5.49	5.88	5.33	8.64	8.63	3.72	3.13	5.56	5.2	9.28	8.87	8.84	1.46	4.27	4.33	4.19
Ccr1	3.35	3.81	4.01	3.33	3.08	3.22	3.55	3.43	3.42	4.06	3.86	1.12	1.21	1.17	1.13	1.39	1.19	0.83	1.12	1.85	1.69	1.49	1.69	1.74	1.46	1.51	1.3	1.09	1.9	1.17	1.47	1.34
Ccrl2	0.95	1.39	1.32	1.68	1.63	2.35	2.8	2.87	1.78	1.17	1.54	2.38	2.78	1.57	2.01	2.06	2.55	2.09	2.16	4.34	3.49	2.47	1.9	2.6	2.74	4.47	4.31	4.43	0.78	2.63	3.34	2.62
Ccrn4l	28.95	28.32	27.82	30.13	28.48	35.72	33.61	33.17	32.32	31.55	30.82	20.89	21.58	23.26	20.9	20.78	19.88	20.36	21.05	17.85	17.99	17.71	16.49	18.41	18.47	13.73	13.34	12.87	11.26	13.6	12.01	14.35
Ccsap	12.74	12.84	12.84	11.25	12.38	10.95	11.43	10.29	12.99	13.4	13.56	5.85	5.99	5.83	5.47	5.27	6.55	7.3	6.1	6.83	6.18	5.72	6.21	6.2	6.44	7.47	8.18	7.15	8.16	7.31	7.54	7.43
Cd200r1	23.44	20.52	21.95	19.36	19.32	17.11	17.6	18.87	22.85	22.83	25.48	12.47	10.66	8.94	8.69	10.83	12.7	13.45	11.57	13.04	14.34	11	10.22	12.02	11.76	19.38	19.34	19.6	17.06	15.8	19.6	16.66
Cd200r4	8	6.93	6.52	6.12	6.2	6.68	6.8	6.61	7.27	8.4	7.54	5.14	5.96	4.67	4.92	4.47	6.12	5.71	5.03	5.38	5.75	2.02	3.69	4.81	4.26	8.85	8.29	7.73	4.55	6.43	7.13	5.92
Cd207	20.36	23.26	20.4	20.69	18.87	18.19	20.22	21.36	20.63	21.03	22.14	22.75	21.03	18.32	21.02	22.6	22.69	22.54	24.77	33.43	35.28	35.74	32.52	36.64	34.19	45.66	44.12	44.76	40.94	44.52	43.23	48.17
Cd244	4.62	4.52	4.1	3.55	4.18	3.87	4.13	3.74	4.15	4.18	4.24	1.97	2.06	1.64	1.72	1.66	2.2	2.14	2.04	1.88	1.84	1.91	2.24	1.88	1.68	1.38	1.57	1.22	1.82	1.33	1.42	1.67
Cd24a	31.6	30.2	32.57	28.18	30.11	28.07	28.88	30.58	31.94	34.89	33.72	23.39	23.53	21.54	21.79	21.58	22.28	24	22.81	16.02	16.26	14.88	17.01	15.74	16.34	11.14	9.51	10.14	13.02	12.61	12.27	14.24
Cd274	3.18	3.66	3.89	3.8	3.64	5.48	4.77	5.4	3.35	3.72	3.14	5.5	5.53	6.05	5.97	6.39	4.16	4.1	4.47	7.45	6.42	5.95	6.28	4.9	5.49	7.79	7.91	7.61	3.69	6.42	7.87	6.07
Cd276	10.32	9.39	9.68	8.98	9.72	9.03	9.4	9.21	10.68	9.45	9.99	6.59	7.18	5.91	5.78	5	6.5	7.02	6.01	6.04	5.59	4.3	4.49	5.17	5.9	4.49	5.02	4.69	3.69	4.14	4.37	4.28
Cd28	1.9	1.62	1.66	1.97	1.85	1.47	1.94	1.68	1.41	1.63	1.79	0.75	0.54	0.48	0.51	0.65	0.74	0.75	0.81	0.8	0.66	0.38	0.38	0.73	0.59	1.44	1.15	1.27	0.67	1.32	0.92	0.75
Cd300lf	9.94	9.47	9.86	9.4	9.15	8.01	8.32	7.04	9.53	9.3	8.51	5.05	4.8	3.66	3.55	3.45	4.77	3.91	3.82	6.59	6.12	3.09	3.08	5.89	4.71	8.46	8.42	8.23	3.58	5.42	5.27	5.91
Cd302	27.52	30.13	30.71	27.27	27.33	29.44	29.5	29.54	23.71	31.07	27.68	36.07	35.82	45.92	42.54	43.04	37.1	35.71	39.56	45.62	43.7	60.47	57.86	46.56	46.48	43.96	49.4	48.63	67.71	61.69	59.71	56.91
Cd34	4.68	4.22	5.27	5.82	5.1	4.7	5.71	4.8	4.11	5.61	5.31	2.93	2.87	2.66	2.51	2.95	3.29	2.72	2.66	2.82	2.91	1.41	1.95	2.85	3.58	4	3.7	3.89	2.07	3.18	3.35	2.98
Cd47	66.93	71	63.99	68.61	69.23	78.43	83.21	82.72	58.04	64.96	67.02	80.38	81.97	86.86	86.86	93.09	76.5	79.01	77.53	97.84	101.89	96.22	92.21	95.56	101.68	131.76	127.51	123.07	86.25	102.58	121.23	108.47
Cd5l	43.16	38.74	37.47	38.94	38.9	38.95	39.3	37.81	37.66	39.35	39.57	27.48	29.67	24.84	27.9	25.29	28.83	31.14	27.83	21.71	23.02	16.09	17.21	21.69	20.26	24.24	24.77	23.93	15.31	18.06	17.07	18.61
Cd69	2.43	3.73	3.31	4.37	4.67	7.01	7.63	7.72	3.63	3.53	3.27	4.82	5.51	6.53	6.6	8.56	5.24	4.15	5.42	8.87	8	6.81	5.82	6.01	7.33	8.33	10.63	11.13	3.36	9.44	11.9	7.4
Cd72	161.95	158.36	150.21	148.75	150.44	138.79	149.08	147.32	153.7	144.98	153.74	136.47	143.77	125.28	134.01	134.75	150.71	158.7	148.96	184.34	192.66	162.91	145.14	181.66	178.79	311.05	311.64	309.46	172.55	227.42	243.84	217.6
Cd74	48.88	58.45	49.44	51.33	55.15	47.57	55.73	53.22	53.32	50.76	54.76	35.99	37.43	37.11	36.72	39.97	44.03	36.38	39.89	26.78	28.2	25.65	27.23	23.74	27.67	26.4	28.6	24.07	25.07	27.53	26.05	24.61
Cd82	34.91	37.32	36.74	38.58	37.89	42.78	45.68	48.61	35.76	38.46	35.45	56.65	52.19	71.77	74.1	82.56	53.1	55.23	53.07	58.18	62.86	102.1	91.55	71.99	74.13	64.3	63.18	63.32	86.46	83.71	89.88	81.71
Cd83	14.92	21.46	20.73	20.62	22.17	35.04	39.08	34.64	16.1	15.71	16.37	3.94	3.89	5.31	5.63	6.25	6.42	6.99	6.8	3.34	3.56	2.89	3.01	4.26	4.67	3.43	3.51	3.7	1.85	3.5	3.93	3.58
Cd84	84.47	91.7	90.36	83.66	84.71	79.61	82.16	80.81	83.67	94.34	92.26	52.05	54.01	43.01	44.08	45.51	54.16	53.36	51.61	52.83	52.22	39.94	37.72	49.14	46.86	73.64	74.15	74.05	57.33	59.47	60.97	60.03
Cd86	3.45	4.37	3.92	4.04	4.01	3.5	3.49	3.82	3.32	4.31	4.54	1.95	1.79	1.57	1.5	1.72	1.44	1.82	1.34	1.67	1.6	1.34	1.24	1.43	1.39	2.39	2.28	2.48	1.23	1.66	1.92	1.47
Cdc42bpa	1.78	1.66	1.89	1.62	1.89	1.83	1.59	1.76	1.86	1.91	1.79	1.04	0.93	0.86	1.01	0.98	1.08	0.88	0.96	1.03	1.12	1.4	1.19	1.14	1.15	0.82	0.96	0.87	1.17	0.86	0.92	0.81
Cdc42ep2	3.1	5.96	5.14	6.85	7.13	9.53	10.89	10.94	4.5	4.43	4.55	3.95	4.59	9.36	8.54	9.46	5.12	4.98	5.24	2.87	4.41	11.53	8.06	5.73	7.22	2.72	2.79	2.56	4.98	6.43	6.08	4.85
Cdc42ep3	22.83	21.28	22.19	20.39	22.24	18.5	19.53	20.65	21.59	23.77	22.39	12.19	11.55	8.49	9.85	8.39	12.04	13.23	12.31	13.16	12.18	7.7	9.06	11.53	10.25	12.67	11.48	11.55	11.68	11.11	11.19	11.21
Cdc6	3.23	3.77	3.35	3.48	3.86	2.72	3.11	2.89	2.98	2.86	2.92	8.54	7.27	7.4	7.53	8.49	8.79	8.55	8.14	6.31	6.12	7.02	7.55	7.32	7.15	5.94	5.63	5.69	8.21	6.77	6.47	7.71
Cdca7	6.87	6.34	5.77	5.87	6.07	5.54	6.06	5.51	5.71	5.93	4.88	15.35	14.57	15.74	17	15.57	16.03	15.44	14.79	11.48	10.36	11.99	14.08	12.83	12.88	6.61	7.77	8.55	11.44	8.46	8.76	10.05
Cdh3	2.52	2.95	2.02	1.95	2.03	3.92	4.23	3.85	0.69	4.33	1.79	4.88	4.6	7.06	5.79	2.87	6.62	10.53	15.97	5.07	3.64	2.78	10.21	2.4	3.7	1.5	1.4	2.29	1.53	5.56	11.25	7.64
Cdk2ap2	18.69	23.24	23.03	22.87	20.92	18.37	20.24	20.61	20.04	20.04	20.53	26.42	26.23	23.34	26.61	27.44	28.72	23.64	29.36	31.12	35.53	30.74	31.23	30.93	30.24	43.02	42.71	41.12	41.34	41.75	44.34	38.34
Cdk5r1	2.25	2.46	2.72	2.42	2.31	2.07	2.36	2.08	1.98	2.28	2.25	1.17	1	1.05	1.09	1.33	1.1	1.11	1.15	1.13	1.01	1	1.01	1.03	1.04	1.1	0.85	0.77	0.88	0.57	0.89	0.86
Cds1	6.53	6.72	6.44	6.58	6.73	6.64	6.38	6.3	6.33	6.53	6.49	4.22	4.62	3.23	3.01	3.72	4.07	4.17	3.81	6.13	5.89	3.8	3.63	5.25	5.1	7.21	7.96	7.46	4.71	5.64	6.47	5.89
Cebpa	44.33	40	44.79	39.82	38.35	33.92	35.19	34.51	44.48	46.77	43.3	25.69	25.5	22.76	23.87	22.43	25.43	26.21	27.33	26.01	26.4	17.81	23.13	23.43	23.92	30.8	27.36	28.5	27.42	27.27	25.25	24.08
Cers6	12.88	12.17	12.05	12.44	12.56	14.67	14.01	14.85	12.43	13.15	13.14	20.78	21.32	26.36	25.57	28.6	20.71	18.8	22.15	24.59	24.49	35.15	28.4	24.25	25.23	27.29	26.49	26.62	22.07	25.51	28.56	26.39
Cfb	0.1	0.16	0.07	0.24	0.1	0.11	0.15	0.16	0.12	0.09	0.03	0.51	0.4	0.98	0.79	0.62	0.23	0.18	0.4	1.61	1.23	2.98	1.59	0.92	0.83	3.95	4.06	3.12	2.47	2.19	2.92	2.3
Ch25h	17.22	19.21	18.5	20.09	20.27	17.46	19.36	18.83	20.39	21.24	19.53	13.92	17	8.61	10.11	9.1	12.9	13.28	13.72	12.42	11.5	5.89	5.88	9.69	10.27	7.35	7.09	7.69	3.3	5.13	5.04	6
Chac1	4.2	4.47	5.46	4.62	3.85	4.05	4.54	5.16	4.19	3.29	3.48	4.73	4.13	4.56	4.56	4	4.15	4.96	4.14	3.97	4.24	3.43	3.72	4.68	3.8	1.4	2.53	2.38	2.13	2.75	2.18	2.61
Chd9	5.67	6.52	6.36	5.73	6.39	5.68	5.87	5.4	5.54	5.6	5.83	3.71	3.54	3.42	3.21	3.04	3.63	3.62	3.81	3.64	3.58	2.94	3.09	3.73	3.87	3.86	4.19	4.04	3.78	3.39	3.68	3.96
Chek1	3.95	4.24	4.28	4.05	3.96	3.89	3.66	3.51	3.32	4.02	3.65	7.03	7.23	7.57	7.38	7.39	8.62	8.2	8.67	5.5	5.53	7.45	6.96	6.59	7.08	4.9	5.11	5.46	7.19	6.23	6.23	6.58
Chmp4b	104.76	103.31	105.84	105.73	106.82	93.6	101.91	101.82	112.11	107.57	95.74	115.48	115.73	103.44	109.93	97.21	96.2	103.21	121.67	153.4	156.39	93.65	106.2	115.97	114.81	217.89	218.49	209.57	125.3	163.47	168.15	138.02
Chn2	11.79	13.59	12.97	12.44	12.28	11.73	12.44	10.72	11.63	11.38	10.96	6.01	6.36	4.71	4.28	5.08	6.62	7.01	6.55	6.99	6.75	4.35	4.04	5.74	6.42	6.97	6.54	6.79	3.62	5.06	4.88	4.96
Chst11	11.13	11.53	10.41	10.79	11.11	12.3	12.11	12.14	11.81	13.05	12.64	5.1	5.17	5.81	5.58	5.14	4.97	4.66	4.37	3.78	3.48	3.01	3.73	3.35	3.27	2.2	1.53	1.85	2.03	2.11	1.62	1.86
Chst3	13.51	11.66	12.79	13.06	12.25	10.94	11.84	11.35	13.32	12.66	11.72	8.83	8.86	8.29	8.35	7.67	8.85	8.82	8.7	6.66	6.12	4.57	5.38	5.9	5.47	4.51	4.37	4.5	3.7	3.78	3.79	3.87
Cirbp	51.61	54.06	56.86	52.68	54.82	49.63	52.23	51.41	51.67	53.89	49.52	18.62	17.03	15.5	16.21	15.33	16.35	16.41	13.57	10.92	10.58	9.39	10.59	11.62	8.19	11.26	12.25	12.56	11.9	11.75	12.24	10.44
Clec2d	3.22	5.83	5.65	6.12	6.32	10.32	8.2	7.77	5.75	6.43	6.06	11.73	12.26	12.69	11.66	13.26	10.32	12.17	14.38	17.84	19.93	13.38	11.5	18.44	18.09	30.44	34.6	29.13	14.03	27.16	33.96	27.45
Clec4a1	6.5	7.43	7.98	6.34	7.17	7.05	6.83	7.68	5.31	6.27	6.01	4.71	4.98	6.94	6.93	7.63	5.73	5.54	6.07	8.09	8.81	15.97	14.73	9.06	10.94	22.3	20.65	22.33	32.11	25.68	27.13	20.8
Clec4a3	5.22	6.18	6.74	5.36	5.83	5.51	5.75	5.04	4.56	5.31	5.54	4.43	4.05	4.14	3.56	4.53	5.25	3.85	4.57	7.5	8.62	9.38	7.57	7.26	6.81	17.11	18.77	17.34	17.83	15.26	18.24	16.33
Clec4e	34.21	41.99	43.17	48.35	47.57	85.6	87.16	93.14	39.21	41.85	44.06	81.01	74.44	159.72	153.74	176.64	90.26	93.97	87.19	88.52	83.77	190.33	170.83	114.66	132.79	81.58	77.55	70.57	105.93	111.66	121.41	109.02
Clec4n	0.85	1.31	0.8	1.44	1.15	1.46	1.59	1.72	1.12	1.81	1.37	2.24	1.83	1.87	2.97	1.88	1.94	2.37	2.45	1.83	2.51	4.24	3.92	3.13	3.48	4.49	3.34	2.57	6.72	3.74	5.41	3.69
Cmpk2	1.58	1.89	1.58	1.81	1.69	2.38	1.25	1.78	1.51	2.1	1.84	24.32	34.35	4.96	6.89	5.79	11.92	15.58	20.24	77	73.34	12.44	7.33	26.28	26.88	136.75	138.34	126.76	10.7	57.67	82.63	49.64
Cnnm2	0.99	1.09	1.35	1.36	1.04	0.76	1.09	1.33	0.97	1.19	1.13	1.6	1.45	1.59	1.7	1.71	1.56	2.1	1.68	2.02	1.99	2.22	1.63	1.46	1.84	2.76	2.31	2.61	2.56	2.55	2.51	2.08
Cnr2	9.61	8.49	8.57	8.11	7.41	5.92	6.33	6.36	8.75	8.93	9.54	5.8	5.94	4.63	4.75	3.8	5.72	5.38	5.09	5.87	5.98	4.13	4.48	5.49	5.74	6.53	6.85	6.45	6.97	5.59	5.67	6.55
Cpeb2	17.21	16.23	15.74	14.92	15.01	14.81	13.01	13.03	16.36	16.57	15.76	10.01	9.74	9.37	8.89	8.21	9.79	9.3	8.78	9	8.43	7.74	8.86	9.01	8.45	6.05	6.26	6.62	6.97	6.54	6.7	7.33
Creb3l2	3.14	3.42	3.68	3.86	3.8	3.34	3.58	4.24	4.47	3.98	3.95	7.54	7.91	6.86	7.74	7.08	7.73	8.23	7.87	4.69	4.66	4.2	4.76	4.27	4.7	4.82	4.37	4.82	4.65	5.01	4.89	4.26
Crebrf	1.49	1.58	1.56	1.28	1.48	1.44	1.4	1.45	1.44	1.36	1.82	2.46	2.54	2.01	2	2.15	2.82	2.87	2.82	3.28	3.38	2.57	2.86	3.38	3.39	5.29	5.29	5.51	3.96	4.66	5.06	4.55
Creld2	26.27	24.48	27.25	25.77	24.06	22.15	24.45	25.12	22.95	23.48	24.48	54.26	54.42	52.58	57.44	54.26	58.04	59.2	61.48	46.38	52.03	42.38	46.83	51.06	50.55	49.3	49.67	54.06	44.2	48.46	48.03	46.88
Crim1	1.24	1.4	1.24	1.21	1.28	1.22	1.06	1.26	1.04	1.16	1.08	0.61	0.63	0.55	0.69	0.52	0.8	0.7	0.75	0.95	1.04	0.86	0.65	0.97	0.78	1.59	1.32	1.38	0.75	1.21	1.12	0.99
Cry1	7.12	8.24	7.39	7.61	7.08	7.03	7.4	7.51	5.55	6.51	6.28	3.7	3.64	4.71	3.89	4.64	4.15	3.82	4.31	4.4	4.17	4.51	5.04	3.84	4.45	4.42	4.53	3.82	4.72	4.72	4.8	4.96
Csf1	0.75	1.26	0.78	1.02	1.44	1.98	1.92	1.91	0.63	0.93	0.86	0.79	1.15	0.53	0.54	0.63	0.71	0.73	0.57	1.57	1.31	0.13	0.38	0.72	0.77	1.97	2.2	1.84	0.35	0.86	1.15	0.93
Csrp2	4.47	4.16	4.61	3.46	3.49	2.68	4.27	4.29	3.37	4.5	2.82	2.04	1.75	2.14	2.23	2.01	1.57	3.02	2.24	2.94	2.89	1.51	2.23	2.01	2.99	1.82	1.81	3.32	3.05	3.73	3.72	2.45
Ctla2b	97.74	107.26	105.2	95.93	94.5	91.33	92.04	92.81	88.84	98.6	98.33	68.66	74.23	42.8	56.53	52.39	76.86	75.98	75.31	84.81	84.3	32.98	40.38	67.83	69.57	157.04	139.92	143.84	57	77.61	93.97	86.5
Ctnnd2	1.31	1.38	1.29	1.25	1.49	1.16	1.42	1.12	1.1	1.12	1.23	0.6	0.64	0.56	0.43	0.53	0.76	0.63	0.58	1.26	1.22	0.87	0.67	0.84	0.76	1.69	1.89	2.1	0.6	1.11	1.03	1.02
Ctsc	125.86	138.32	136.18	137.04	135.8	133.47	137.89	141.98	130.65	138.28	136.68	166.66	169.15	162.25	168.61	167.84	171.57	163.96	173.11	193.68	197.32	192.36	180.88	183.24	190.62	260.08	253.79	250.77	197.33	220.27	246.38	215.06
Ctsk	0.98	1.29	1.44	1.64	1.78	1.68	2.02	1.67	2.18	1.9	1.58	2.08	1.77	1.22	1.72	1.56	2.02	2.05	1.5	2.22	2.68	2.44	3.24	2.64	2.92	3.09	3.69	4.27	6.19	5.16	3.43	4.07
Cx3cl1	2.32	2.49	2.75	2.72	2.3	3.75	2.75	3.52	2.72	3.43	3.07	1.11	1.12	1.58	1.49	1.27	1.43	0.92	1.47	0.82	0.74	0.89	0.66	0.77	0.96	0.61	0.56	0.71	0.55	1	0.75	0.69
Cxcl1	0.49	0.66	0.45	1.99	1.99	5.31	5.56	6.56	1.94	1.89	1.99	3.46	2.87	18.25	17.03	13.29	6.1	5.31	6.19	2.63	2.52	7.99	10.25	5.38	6.1	1.35	1.58	1.21	3.12	3.04	3.64	2.95
Cxcl10	30.68	42.9	39.55	56.91	53.23	87.3	79.06	81.12	45.06	44.24	45.1	216.97	286.12	58.68	82.46	86.81	123.53	140.52	193.15	454.91	412.78	78.48	54.69	179.96	184.47	523.03	566.88	519.28	35.63	261.34	406.23	217.43
Cxcl11	0.18	0.38	0.4	0.24	0.37	0.33	0.35	0.37	0.29	0.13	0.3	1.18	1.53	0.23	0.45	0.62	0.41	0.61	1.01	4.27	2.34	0.75	0.43	0.79	1.64	3.22	5.45	3.41	0.23	1.49	2.27	1.04
Cxcl2	6.84	13.05	10.21	21.41	23.49	64.89	47.45	60.43	20.87	28.66	25.64	29.53	29.76	113.93	111.79	115.34	45.29	49.58	46.8	25.13	21.02	75.85	70.82	44.72	52.41	14.97	14.22	15.27	17.8	25.35	25.05	24.41
Cxcl3	1.35	1.31	0.65	2.16	2.54	4.32	5.51	6.42	1.55	2.21	2.49	4.55	5.32	23.39	21.58	23.74	4.98	4.89	5.52	4.14	4.62	17.41	19.35	6.2	8.72	3.2	3.51	2.93	6.32	5.99	6.2	5.37
Cybb	75.12	84.45	79.79	82.15	80.12	97.8	102.24	103.38	73.34	77.72	82.5	121.78	125	176.23	170.96	191.24	126.39	133.38	133.54	150.94	157.09	243.98	231.6	169.63	189.87	213.12	215.18	214.7	238.39	227.09	246.32	219.06
Cyp51	51.34	51.33	50.39	50.59	50.63	47.65	50.1	50.7	51.24	52.89	51.98	19.48	18.2	17.78	18.84	17.93	19.87	19.98	19.1	19.38	18.81	17.29	16.72	19.58	19.84	24.08	23.73	23.98	18.23	20.14	20.52	21.22
Cysltr1	7.33	8.62	7.87	7.09	7.65	6.69	6.78	6.33	6.81	7.27	7.29	11.37	11.85	10.49	9.82	11.03	11.34	11.88	11.59	17.95	16.59	13.99	12.6	14.98	14.51	21.17	19.62	20.07	13.68	18.09	18.36	17.52
Cyth1	32.53	34.6	35.48	33.19	33.3	29.76	32.52	31.79	34.75	35.62	31.43	20.71	21.14	16.27	18.04	17.21	18.26	17.86	20.17	22.64	22.99	20.64	19	19.61	19.7	24.5	23.19	23.57	20.57	22.61	21.37	21.76
D030028A08Rik	1.66	1.24	1.87	1.69	1.8	1.97	2.02	1.77	1.73	1.95	1.9	2.86	3.08	3.03	3.21	3.79	2.66	3.32	2.6	2.27	2.23	3.4	2.11	2.63	2.29	1.6	1.28	1.44	2.24	2.31	1.63	2.18
D4Wsu53e	58.95	59.17	55.76	58.36	57.4	63.9	48.95	51.22	74.96	60.31	57.08	78.31	84.92	75.27	77.74	69.35	75.77	71.33	83.92	94.78	95.12	82.09	78.49	90.05	82.39	118.26	119.28	118.97	100.75	100.26	108.68	104.34
D8Ertd82e	12.89	13.35	14.24	14.93	15.81	14.27	15.38	15.77	13.48	13.24	12.1	11.89	11.08	12.53	13.2	11.42	10.17	10.2	12.72	9.57	8.67	7.5	9.47	8.47	8.94	5.24	6.12	5.3	6.75	7.07	5.88	5.64
Daxx	15.38	15.86	17.53	16.69	17.17	15.75	17.23	17.14	18.82	18.71	17.81	25.58	31.35	16.32	15.59	17.62	20.3	22.53	23.51	41.73	43.73	21.61	16.95	25.43	27.42	62.39	61.31	59.86	18.59	36.26	43.47	34.33
Dck	44.77	44.25	41.56	41.67	43.11	38.66	39.6	39.51	36.18	38.49	40.45	53.78	62.48	40.39	41.88	41.44	48.98	50.99	52.72	94.2	102.43	54.53	50.89	71.58	74.46	134.56	135.77	129.71	59.29	88.46	103.64	95.74
Dclre1c	5.22	5.5	5.4	5.31	5.59	6.54	5.83	5.82	6.06	6.15	5.14	7.2	7.12	7.14	6.1	6.17	6.55	6.04	7.16	7.36	7.4	8.32	6.03	7.72	7.16	11.93	10.69	10.15	7.35	8.32	8.88	9.25
Dctd	2.59	1.96	2.75	1.96	2.49	2.72	2.89	2.04	2.69	2.16	2.36	5.92	5.6	6.61	7.04	7.48	5.88	5.22	6.25	3.87	4.34	5.96	6.24	4.55	5.45	2.5	2.49	2.76	4.08	3.49	3.33	2.94
Ddah2	5.25	6.11	7.2	5.68	5.44	4.6	5.23	5.51	6.05	6.51	5.7	4.41	3.5	3.29	3.64	2.38	4.07	3.74	4.05	3.36	2.96	1.59	2.23	2.99	1.87	2.77	2.76	2.49	2.17	2.54	2.28	2.48
Ddit3	6.88	8.67	9.71	7.82	8.76	8.97	8.56	10.85	9.79	9.44	9.18	8.88	10.61	9.15	10.82	11.42	8.4	10.64	9.32	11.9	10.93	11.24	11.22	11.25	10.23	15.43	16.43	16.99	9.51	12.95	13.37	14.56
Ddx58	4.42	5.74	4.8	5.66	4.97	5.39	5.1	5.39	4.8	5.09	5.4	13.42	17.95	6.13	6.96	7.43	8.44	10.54	12.9	39.26	42.69	12.87	8.28	22.86	24.22	77.75	75.27	69.49	14.18	44.05	51.42	41.18
Ddx60	0.79	0.86	0.67	0.67	0.88	0.78	0.7	0.87	0.73	0.69	0.93	1.8	1.98	0.6	0.89	1.01	0.97	1.63	1.3	5.86	6.13	1.4	1.03	2.95	2.9	14.52	13.9	12.57	1.65	5.83	7.53	5.97
Deptor	2.57	2.2	2.77	2.99	2.63	2.08	2.6	2.34	1.91	2.84	2.14	2.28	1.97	2.12	1.51	1.93	2.12	2.43	2.12	1.42	1.32	1.61	1.37	1.08	1.33	1.18	1.1	1.21	2.15	1.3	1.63	1.82
Dguok	6.88	6.56	6.22	6.59	5.17	5.86	6.41	6.85	7.17	7.44	6.45	12.38	11.08	10.85	11.56	10.42	11.02	12.05	12.07	11.2	12.83	10.45	10.07	10.47	11.63	13.14	17.08	15.18	11.88	13.87	12.82	11.12
Dhcr24	67.89	69.15	65.23	66.92	71.11	60.69	65.25	63.52	67.48	69.76	66.36	42.16	41.17	37.73	38.31	36.24	41.67	42.19	41.1	32.52	31.54	28.74	31.55	31.51	32	35.87	32.32	33.1	35.63	33.98	35.92	32.24
Dhx58	12.21	13.44	11.57	13.17	12.53	12.42	12.29	12.04	13.37	12.99	12.64	17.48	24.36	9.64	9.95	11.34	13.27	14.96	16.2	48.84	53.86	17.86	13.6	30.53	31.43	90.69	92.56	84.36	21.24	55.06	65	58.27
Dleu2	1.38	1.33	1.01	1.29	1.25	0.97	1.48	1.56	0.94	1.25	1.31	1.72	1.52	1.87	1.95	1.64	2.07	2	2.45	2.03	2.21	2.45	2.29	2.55	2.3	3.13	2.46	3.46	2.53	2.79	3.26	2.95
Dmpk	54.03	52.22	58.26	55.83	54.99	48.69	50.5	51.34	54.88	49.6	45.68	25.2	25.99	21.32	21.31	18.27	24.43	24.58	26.76	27.83	24.46	16.9	17.32	23.59	22.26	27.13	26.74	24.69	20.67	21.15	20.46	21.07
Dnajb4	34.45	29.05	29.4	28.08	26.68	26.57	29.2	28.31	28.17	29.48	31.25	27.15	27.85	26.48	28.61	29.76	29.12	29.85	27.33	20.52	23.03	22.33	24.21	21.22	21.41	15	13.72	13.96	14.92	15.29	14.65	16.36
Dnajb9	12.14	12.99	11.92	13.12	10.69	11.02	11.95	11.37	10.28	13.23	10.9	26.7	27.25	23.91	27.6	26.37	30.03	28.09	31.12	20.64	22.43	20.33	20.06	19.7	21.02	26.38	25.99	26.03	24.35	25.61	25.56	25.87
Dock6	1.59	1.55	1.14	1.56	1.47	1.65	1.15	1.49	1.62	1.25	1.27	0.98	1.21	1.08	1.18	0.94	0.95	0.98	1.19	1.03	0.93	0.45	0.91	1.09	0.99	1.09	1.19	1.14	1.18	0.93	0.96	1.2
Dst	3.09	3.34	3.12	3.18	3.21	4.03	3.13	3.74	3.77	3.23	3.66	4.23	3.86	5.31	4.96	5.18	4.08	3.99	3.94	4.92	4.58	8.61	7.61	5.52	5.68	3.97	3.86	3.79	5.25	4.79	4.28	5.57
Dtl	6.27	5.99	5.82	6.32	6.06	4.53	5.33	5.34	4.91	4.84	4.41	12.34	12.7	12.03	12.26	11.83	13.82	12.74	13.24	9.96	9.72	11.59	10.85	11.72	11.94	9.09	9.3	9.27	13.14	10.19	10.03	9.49
Dtx3l	7.24	7.43	7.12	7.54	7.26	7.61	7.8	7.23	6.89	6.94	6.41	15.85	18.25	8.74	9.47	10.21	12.35	12.6	14.22	26.43	29.37	12.49	10.85	17.68	18.64	43.2	43.63	40.82	12.6	26.87	33.74	26.22
Dusp5	6.51	6.99	5.7	7.03	8.74	9.21	9.78	8.66	6.2	6.55	6.2	6.52	6.56	7.1	7.44	8.09	6.11	5.59	4.96	4.19	4.7	5.19	4.84	4.1	5.21	1.93	2.5	2.65	2.73	3.76	2.62	2.71
Eaf1	59.44	59.27	58.74	56.92	56.55	59.19	62.77	61.7	52.49	57.57	56.79	45.77	46.25	51.79	51.95	51.2	47.7	44.74	46.59	38.48	37.64	43.53	43.99	39.95	41.44	27.53	27.97	26.9	31.67	30.06	30.01	30.02
Ednrb	1.96	2.06	2.2	2.03	1.82	2.83	2.36	2.73	1.6	2	1.95	0.93	0.74	1.64	1.18	1.09	0.58	0.95	0.57	0.57	0.87	2.07	1.96	0.91	1.24	0.64	1.06	0.7	2.2	1.11	1.41	1.63
Efr3b	6.76	6.44	6.01	6.1	5.95	6.04	5.89	6.2	7.49	7.39	7.23	7.27	7.38	6.77	6.75	6.12	7.01	7.31	6.63	4.86	5.38	4.98	4.36	4.54	4.46	3.54	3.56	3.59	2.87	2.99	2.76	2.98
Egln3	3.49	2.55	2.48	2.86	2.86	1.91	2.53	2.87	3.11	2.27	2.96	10.53	9.44	10.68	9.75	9.9	9.59	10.15	10.92	7.7	7.14	8.67	10.23	7.31	7.85	3.48	3.88	3.56	6.14	5.05	5.04	5
Egr2	2.27	1.65	2.41	2.71	3	4.49	3.83	4.4	2.28	2.5	2.16	2.73	2.23	3.67	3.86	4.34	2.19	3.02	2.59	1.19	1.21	2.27	1.71	1.54	1.71	0.44	0.83	0.77	0.95	0.84	0.91	1.09
Eif2ak2	16.61	17.51	16.22	16.6	16.47	16.94	16.68	15.76	16.16	15.49	16.69	20.51	26.61	12.39	13.84	15.47	16.62	17.96	18.29	40.33	43.47	19.81	15.52	28.74	30.56	59.82	56.99	56.08	20.71	39.55	44.75	40.29
Eif3j2	6.08	2.01	0	2.91	1.26	0	0	2.17	1.79	1.74	0	6.44	8.92	16.01	5.59	8.97	0	0	15.45	9.26	5.62	6.3	8.08	13.68	4.62	6.2	6.9	2.65	9.6	11.24	9.16	0
Eme2	2.13	2.5	3.24	3.28	3.13	2.45	2.6	2.71	3.01	2.54	3.66	4.33	4.28	3.89	4.8	4.26	4.94	3.02	3.74	3.93	4.05	3.56	3.81	3.47	3.5	5.12	5.08	4.76	4.21	4.43	3.27	3.33
Engase	2.9	2.33	2.92	2.13	2.48	1.88	2.02	2.07	2.97	2.31	2.91	4.49	4.25	3.55	3.63	2.95	3.77	3.63	3.96	4.28	4.42	2.96	4.34	4.2	3.67	6.87	5.99	7.58	6.66	6.33	5.92	5.57
Eno2	1.91	1.98	2.08	2.18	2.56	2.66	2.6	1.78	2.83	2.5	2.24	0.89	0.95	0.68	0.81	0.59	1.22	0.67	1.29	0.87	0.91	0.58	0.81	0.83	0.8	1.03	0.99	1.04	1.1	1.42	0.96	0.99
Enox2	5.09	5.88	5.47	4.88	5.2	5.31	4.57	4.8	4.56	5	5.83	7.77	7.54	6.91	7.61	7.79	8.22	7.67	7.25	9.37	9.42	10.04	9.07	9.49	9.68	10.01	10.9	11.09	11.17	11.15	11.85	11.78
Enpp1	8.93	8.98	8.81	9.17	8.42	8.49	8.5	8.29	9.85	10.34	10.43	6.19	6.93	5.29	5.24	6.29	6.92	7.59	7.36	5.37	4.63	3.85	3.52	4.42	4.7	4.31	3.7	3.85	2.67	3.19	3.82	3.35
Enpp4	0.39	0.38	0.47	0.43	0.52	0.48	0.57	0.55	0.36	0.32	0.4	0.9	1.1	0.62	0.66	0.7	0.78	1.06	0.66	2.13	2.26	0.93	0.9	1.61	1.34	4.3	4.04	3.9	0.94	2.16	2.83	2.52
Entpd1	4.85	5.44	5.74	5.22	5.64	5.08	5.39	4.91	4.95	5	6.28	1.69	2.21	1.2	1.52	1.31	1.82	2.32	1.71	2.17	1.75	0.46	1.2	1.66	1.51	3.14	2.88	2.98	2.4	2.3	2.93	2.67
Epas1	2.47	2.48	2.33	2.51	2.26	2.17	1.97	1.93	2.29	2.26	2.34	1.83	1.67	1.52	1.37	1.37	1.88	1.93	1.63	1.39	1.27	0.56	1.1	1.57	1.13	0.87	0.73	0.84	0.97	0.89	1.14	0.88
Epb4.1l1	17.2	16.77	15.72	15.92	17.2	14.07	15.35	15.1	16.57	17.21	16.39	7.8	7.84	7.17	7.51	6.91	6.76	6.82	6.89	12.56	12.37	9.76	10.81	9.28	9.57	14.62	14.81	15.24	13.73	13.38	12.53	11.98
Epha2	1.51	1.43	1.33	1.49	1.52	1.21	1.05	0.99	1.29	1.55	1.02	1.11	0.9	0.88	0.79	0.64	1.08	0.9	0.94	1.26	1.06	0.98	0.89	1.32	1.13	0.81	0.57	0.68	0.69	0.58	0.62	0.42
Eps8	7.18	6.32	6.7	7.1	6.89	6.03	6.42	5.95	5.25	6.12	6.27	2.22	2.62	1.81	1.98	1.89	2.35	2.57	2.39	4.38	3.9	3.66	2.58	3.14	3.34	4.12	4.1	4.23	4.62	3.68	4.15	4.62
Epsti1	13.09	14.3	12.37	12.65	12.34	12.37	13.51	13.51	13.38	13.59	13.72	15.37	18.21	9.58	11.2	11.01	11.17	13.62	13.14	42.21	43.92	17.78	14.3	25.89	26.61	95.54	93	87.63	24.99	53.13	63.1	48.57
Errfi1	8.28	9.71	9.93	9.92	10.3	10.65	11.78	10.92	8.44	9.16	8.58	8.88	8.21	10.35	10.98	12.26	8.14	9.37	7.77	6.11	6.01	6.23	7.82	5.98	7.27	4.12	3.14	3.74	5.45	4.61	5.16	5.04
Etnk1	19.67	20.71	20.37	19.87	19.83	19.18	19.87	19.9	19.13	19.89	20.66	21.77	23.82	18.15	18.75	18.62	20.97	20.28	21.73	29.45	31.64	19.97	18.86	24.73	23.68	40.39	38.69	37.98	18.71	26.34	31.24	29.11
Etv5	41.08	40	38.73	37.07	38.83	30.89	34.35	32.97	39.56	41.06	39.21	26.26	26.34	19.27	20.21	19.8	26.09	26.45	23.87	24.3	23.58	18.23	19.08	19.82	21.84	18.03	18.27	18.17	19.51	17.22	15.94	17.81
F10	1.55	1.16	1.09	1.33	1.14	1.08	1.29	1.19	1.16	1.14	1.57	1.8	1.83	1.9	2.32	2.17	1.72	2.01	1.68	1.6	1.72	3.78	2.51	1.6	1.87	1.44	1.52	1.48	2.09	2.01	2.05	1.77
F13a1	4.04	5.25	5.09	4.96	4.67	3.92	4.68	4.03	3.93	4.01	4.01	2.46	2.46	2.36	2.14	2.49	2.79	2.76	2.78	1.94	1.76	2.37	1.45	1.9	1.74	1.3	1.78	1.55	1.7	1.72	1.42	1.76
Fads3	1.72	1.74	1.65	1.56	1.89	1.42	1.43	1.59	1.74	1.58	2.16	1.07	0.69	1	1.01	1.17	1.34	0.83	1.17	1.03	0.84	0.77	0.55	0.71	1	1.03	0.7	0.68	1	0.46	1.19	0.59
Fam102a	10.59	9.77	9.72	9.85	10.21	8.09	8.9	7.96	8.37	9.14	8.07	5.69	5.27	4.73	4.52	4.17	5.82	5.47	6.15	7.11	7	6.72	6.41	6.87	6.75	7.93	7.76	7.47	8.98	8.17	8.28	6.84
Fam120c	0.5	0.51	0.54	0.56	0.45	0.63	0.47	0.48	0.62	0.68	0.53	1.4	1.11	1.36	1.4	1.12	1.39	1.06	1.78	1.15	1.3	1.5	1.49	1.26	1.32	1.2	1.14	0.97	1.45	1.26	1.35	1.39
Fam162a	63.71	65.19	64.65	63.44	57.44	61.27	66.56	64.68	57.72	61.91	56.31	97.77	98.88	105.64	107.9	108.83	99.19	91.53	100.06	108.93	112.88	141.57	122.82	119.23	115.52	82.39	87.41	86.3	116.91	102.82	105.42	103.1
Fam198b	11.5	11.02	10.28	10.65	10.02	8.82	9.94	9.54	10.24	11.01	10.95	3.66	3.67	2.58	2.74	2.87	3.71	3.44	3.34	3.12	3.18	2.03	2.26	2.74	2.7	2.99	3.34	3.36	3.18	2.63	2.52	2.77
Fam26f	0.14	0.56	0.47	0.54	0.76	0.32	0.15	0.4	0.33	0.56	0.44	0.65	0.83	0.15	0.3	0.25	0.38	1.03	0.41	2.16	1.69	0.89	0.61	0.71	0.29	3.08	3.89	3.28	0.99	2.16	2.04	1.76
Fam46a	4.55	4.72	4.61	3.83	4.36	3.85	3.7	3.51	4.15	4.44	3.78	7.15	7.97	3.82	3.72	3.74	5.73	5.89	6.27	11.11	11.74	5.84	4.65	7.4	7.23	17.95	18.12	17.19	6.15	10.62	13.76	11.12
Fam46c	2.95	3.63	4.44	4.13	5.2	4.47	5.98	5.57	3.83	3.97	3.51	1.41	1.42	1.25	1	1.26	1.74	1.73	1.18	2.06	2.04	1.43	1.18	2.13	1.81	3.44	3.53	2.65	1.15	1.9	2.11	1.96
Fam92a	6.37	7.85	6.33	6.3	7.8	6.22	6.11	6.34	5.54	5.61	5.85	5.54	4.97	5.41	5.1	4.52	5.56	4.74	5.52	4.6	4.42	2.55	4.23	4.61	4.38	3.73	3.13	2.88	3.79	3.13	3.55	3.37
Fbxw17	7.81	9.11	8.38	8.07	8.6	9.43	8.37	7.86	8.42	8.17	9.22	9.9	9.24	7.8	7.35	6.85	8.53	8.71	10.12	14.76	15.57	9.57	8.2	12.48	13.55	27.84	26.82	25.05	9.27	18.8	19.02	17.85
Fcgr1	42.51	46.33	42.59	43.22	43.15	38.05	40.98	39.28	41.26	39.68	40.17	44.37	53.8	25.21	29.94	27.54	34.88	42.21	40.05	106.04	118.86	40.21	32.8	67.21	70.24	250.43	245.93	222.37	45.39	108.08	133.46	104.05
Fcgr2b	21.23	23.2	23.49	24.41	23.01	24.01	25.7	27.03	24.79	23.68	26.09	24.23	24.34	28.75	29.23	32.01	24.47	25.02	23.6	21.17	22.95	31.19	29.21	22.87	23.8	22.83	21.92	21.56	30.33	26.67	27.62	25.55
Fcgr3	136.58	149.78	149.37	139.15	146.76	130.04	139.34	134.89	140.75	147.18	144.2	86.15	93.08	66.37	69.98	69.84	90.99	90.56	83.55	93.41	91.2	65.65	59.57	82.1	76.4	108.12	106.29	104.78	94.72	86.42	90.82	92.63
Fcgr4	5.52	5.42	5.59	4.8	6.07	4.51	5.81	5.56	4.26	4.41	4.96	4	4.77	2.71	2.24	3.16	3.97	3.45	5.22	10.13	9.51	3.23	1.98	5.21	5.95	32.66	30.52	27.17	6.45	11.89	15.36	10.81
Fcrls	36.3	51.17	45.89	41.99	46.12	39.05	47.12	42.51	41.91	44.07	43.94	31.51	31.73	26.09	28.21	25.56	38.13	32.19	33.51	26.2	25.98	20.44	16.86	26.03	25.54	28.55	26.23	25.2	16.84	22.75	23.14	22.92
Fdps	136.15	142.16	138.99	134.44	139.55	129.54	140.09	136.97	140.84	142.46	146.11	103.19	97.93	100.65	103.14	99.13	113.41	110.74	101.4	80.58	78.58	68.41	67.43	81.63	87.99	100.83	107.33	99.31	82.17	94.31	104.6	96.17
Fgd2	13.17	13	13.35	14.73	14.13	13.61	12.65	11.93	14.17	12.92	12.41	16.16	16.9	15.58	15.38	14.66	16.66	15.74	18.83	24.59	23.71	19.44	20.58	23.35	21.74	28.9	28.5	29.33	24.46	25.13	26.17	25.33
Fgfr1	2.01	1.79	2	2.04	1.98	1.79	2.17	1.98	1.89	2.14	1.93	3.01	2.89	2.81	2.65	2.86	2.82	2.83	2.31	3.8	4.2	4.27	4.36	3.45	3.52	3.62	4.02	3.75	4.61	3.85	4.04	3.95
Fgl2	1.97	2.24	1.44	1.81	1.72	1.45	2.26	1.98	2.06	1.58	2.22	1.25	1.39	0.81	0.91	1	1.13	1.25	1.57	2.5	2.41	1.03	0.83	1.32	1.26	8.12	7.89	7.85	3.09	3.42	4.5	3.05
Fgr	3.22	3.65	3.68	4.15	3.52	5.95	4.81	4.99	5.21	5.19	4.9	4.74	4.63	7.52	7.22	7.75	4.72	5.67	5.24	4.83	5.56	9.67	8.77	7.2	8.48	4.88	5.2	4.81	8.53	7.02	7.7	6.38
Fhod1	33.78	33.68	36.07	36.25	36.7	34.88	33.32	34.44	37.34	34.29	33.4	25.56	25.85	25.88	24.7	21.96	24.38	25.27	24.79	21.56	21.45	19.71	21.66	20.39	19.83	15.57	15.96	15.44	18.9	16.66	15.69	16.77
Flnb	4.98	5.48	4.88	5.68	5.25	6.76	6.49	7.02	5.41	5.11	5.99	6.95	6.57	9.87	9.61	9.28	6.76	7.08	7.4	6.94	7.03	11.9	11.1	8.39	8.66	5.83	5.95	6.12	8.1	6.64	6.71	7.31
Flrt2	9.89	8.49	9.24	8.24	8	9.19	8.58	9.62	9.08	9.57	9.28	17.77	18.07	17.22	16.35	19.13	16.64	16.41	17.84	20.24	21.52	20.49	19.83	17.17	18.63	20.14	20.06	19.31	16.9	18.52	18.27	18.19
Flrt3	0.79	1.03	0.91	1.47	1.29	2.11	1.74	2.15	1.18	1.13	1.28	1.89	1.93	3.04	2.81	3.65	1.96	2.16	2.31	1.44	1.52	1.8	2.63	1.68	2.03	1.4	1.21	1.16	1.36	1.55	1.55	1.83
Flt1	2.99	2.66	3.09	3.16	3.01	3.22	3.14	3.23	3.38	3.36	3.41	3.8	4.32	4.41	4.02	4.27	4.19	3.85	4.08	4.9	4.9	5.19	4.34	3.83	4.43	5.73	6.04	5.3	3.05	3.97	4.15	3.8
Fn1	2.25	2.85	2.71	2.87	2.76	2.93	2.6	2.61	2.35	2.5	2.55	2.17	2.09	2	2.18	1.83	2.12	2.41	2	1.64	1.45	1.69	1.74	1.92	1.41	1.1	1.12	0.91	1.06	0.97	0.96	1.15
Fpgs	8.66	7.99	7.65	7.79	8.2	6.81	8.13	8.15	7.92	8.02	7.47	8.91	6.73	8.43	7.8	6.56	7.15	6.35	6.99	5.37	5.39	5.71	6.2	5.39	5.46	3.82	3.69	3.79	5.28	4.51	4.32	4.07
Fpr1	0	0	0	0.16	0.05	0.06	0.23	0.12	0.26	0.06	0.06	0.47	0.28	1.5	1.67	2.23	0.15	0.16	0.24	0.66	0.81	7.2	5.67	1.31	2.03	2.02	1.67	1.23	6.14	3.76	4.05	3.57
Fpr2	0.15	0.08	0.08	0	0.28	0.46	0.18	0.49	0.07	0.13	0.16	0.61	0.19	1.81	1.87	1.51	0.3	0.22	0.25	1.41	1.45	6.39	6.09	1.81	2.92	2.79	3.55	3.1	6.39	4.82	4.5	4.85
Frmd4a	10.07	9.56	9.25	9.33	9.23	8.41	8.27	8.94	9.18	9.71	10.01	10.57	11.02	7.89	7.32	7.58	8.26	9.87	10.13	14.12	14.63	9.21	8.43	10.68	10.42	18.72	19.55	17.85	10.08	13.65	14.44	13.58
Frmd6	9.47	9.41	9.85	9.46	10.06	10.48	10.91	10.24	10.44	10.12	9.55	5.29	5	5.35	5.1	5.7	4.71	4.82	5.04	3.9	4.48	3.82	4.19	4.41	4.73	3.38	3.21	3.43	2.66	3.06	2.57	3.07
Ftsjd2	21.96	22.16	22.56	22.74	22.59	21.97	22.67	23.32	21.17	22.12	21.82	26.74	28.37	25.29	25.6	26.84	24.48	25.27	27.72	36.43	39.4	32.87	27.85	30.98	32.18	50.68	51.34	48.94	29.94	38.84	42.55	38.23
G530011O06Rik	1.67	2.77	1.69	1.91	2.15	3.11	1.83	2.6	3.25	2.38	1.94	2.05	2.38	2.17	1.7	1.57	1.91	1.73	2.05	3.13	2.75	1.71	1.4	2.65	1.64	4.37	4.37	4.13	1.19	1.92	2.96	2.96
Gadd45a	16.23	15.62	19.73	18.87	19.64	24.18	24.07	24.23	17.02	18.14	18.26	12.82	10.96	16.86	17.46	20.37	13.11	14.67	14.26	7.89	8.08	9.43	12.95	11.49	12.32	4.34	4.11	5.47	7.69	5.98	6.88	7.9
Galnt6	21.56	20.28	20.42	20.17	20.86	18.96	22.19	20.76	20.63	21.38	21.24	11.14	11.29	10.56	11.03	10.72	10.73	10.92	9.53	11.07	11.11	12.69	11.19	10.53	10.86	12.57	12.6	11.44	12.87	12.13	12.39	11.17
Gas6	70.53	76.5	74.72	77.46	74.94	62.54	70.42	66.92	72.73	70.63	69.31	32.7	32.56	25.55	27.85	24.91	35.39	35.24	32.69	19.97	18.63	11.27	10.92	16.4	16.58	22.65	20.92	20.74	13.95	16.44	16	14.54
Gbp2	1.86	2.36	1.9	2.33	2.31	2.6	2.89	2.71	1.87	1.95	2.41	9.69	13.81	5.08	7.29	8.42	6.42	6.15	8.88	34.57	33.14	14.85	8.84	14.18	18.1	78.62	81.72	70.62	11	35.69	48.71	31.67
Gbp3	1.25	2.71	1.78	1.69	2.09	2.1	2.74	2.21	1.85	2.02	1.65	6.1	8.3	3.11	4.11	4.14	3.49	5.47	4.89	19.75	19.93	7.19	3.85	7.76	9.94	43.12	42.88	37.27	4.81	18.46	25.65	16.94
Gbp5	0.2	0.38	0.39	0.34	0.28	0.9	1.14	0.75	0.18	0.38	0.37	4.64	5.01	1.84	2.61	3.36	2.5	2.54	3.65	13.18	10.44	3.27	1.83	4.69	5.31	18.28	18.75	17.3	1.76	7	14.21	7.58
Gbp7	0.56	0.56	0.49	0.72	0.8	0.75	0.77	0.92	0.71	0.84	0.63	2.05	3.76	0.91	1.3	1.23	1.4	1.7	1.74	8.92	9.49	2.45	1.3	3.74	3.87	22.01	20.32	18.15	2.28	9.34	12.04	8.39
Gbp9	1.32	1.74	1.59	1.18	1.05	1.4	1.17	1.45	1.5	1.28	1.01	2.01	3.28	1.43	1.43	1.51	1.69	1.81	2.52	7.63	8.27	2.91	2.8	4.15	4.75	20.55	22.16	20.04	4.56	10.2	12.31	9.93
Gclc	66.11	57.15	58.47	57.59	55.86	55.28	51.61	53.56	58.15	60.93	61.33	30.7	31.15	28.73	30.74	27.45	31.9	33.48	31.32	30.6	30.07	30.03	30.65	30.66	32.04	19.77	20.02	21.01	29.05	26.45	24.64	29.1
Gclm	183.65	153.7	157.19	150.75	144.81	149.32	143.81	152.58	147.56	154.86	149.76	101.86	99.45	101.01	93.6	100.47	109.74	115.11	97.42	98.71	96.8	110.66	113.63	100.25	108.64	71.99	67.62	66.38	107.17	95.83	94.94	97.99
Gdpd1	5.85	6.33	6.71	6.41	6.35	8.54	8.43	7.5	5.18	5.8	5.62	9.22	9.51	13.58	13.7	14.22	10.8	11.83	10.62	9.92	11.24	17.07	17.27	12.21	14.4	10.17	10.31	10.56	15.4	15.41	15.76	13.72
Gja1	2.91	2.23	2.76	2.42	2.53	2.08	2.54	2.65	2.12	2.46	2.78	3.63	3.46	3.23	3.55	3.49	3.47	3	2.95	2.2	2.05	4.15	3.94	2.81	2.69	1.15	0.79	1.34	2.7	2.46	1.9	2.07
Gm11711	16.79	17.18	18.63	17.84	17.66	15.27	17.23	16.26	17.96	17.99	19	11.49	13.39	10.3	12.08	10.69	11.98	12.15	10.99	9.11	9.88	8.5	8.01	9.55	9.43	11.97	12.25	13.03	7.65	9.38	9.03	8.8
Gm12185	0.49	0.48	0.57	0.37	0.45	0.57	0.48	0.32	0.59	0.5	0.51	1.01	1.23	0.52	0.59	0.56	0.82	0.76	0.69	1.94	1.93	0.74	0.69	1.26	1.24	3.76	3.76	3.69	0.87	1.78	2.36	2.02
Gm12250	0.73	1.26	0.94	0.92	1.19	0.61	1.15	0.94	0.72	0.86	0.84	5.58	8.71	1.73	2.06	2.25	3.72	3.62	5.48	18.27	20.07	4.08	2.31	9.25	9.66	40.92	41.54	37.54	3.8	17.68	25.92	16.4
Gm12505	2.09	3.03	1.61	2.32	2.79	4.17	2.22	3.18	1.49	1.95	2.15	3.68	5.34	6.73	6.97	8.5	5.81	5.03	4.66	6.46	7.21	9.79	9.7	8.58	9.16	6.9	6.49	6.31	8.56	8.17	8.43	6.07
Gm14005	10.86	21.68	17.41	14.7	15.7	13.59	11.19	14.86	16.7	14.81	14.82	8.8	11.31	13.71	13.15	15.09	12.36	13.93	10.76	12	11.74	8.2	14.64	11	14.87	6.9	5.98	7.79	8.94	13.24	9.77	7.6
Gm14085	0.72	0.81	0.82	0.71	0.88	0.97	0.82	0.79	0.9	0.81	0.85	0.84	0.95	0.78	0.7	1.1	1.04	0.83	0.84	1.63	1.58	1.42	1	1.25	1.3	2.93	2.82	2.48	1.12	1.66	1.99	1.6
Gm14306	2.77	3.01	3	2.16	3.1	3.46	2.49	2.45	3.22	2.54	3.1	3.66	3.78	3.78	3.45	3.95	3.37	4.44	4.18	3.84	3.34	6	4.56	4.06	3.33	2.68	2.66	3.3	3.42	3.34	3.16	3.44
Gm14393	5.4	5.77	5.75	3.56	3.47	6.36	5.12	3.92	4.97	4.39	5.94	6.02	5.6	6.06	5.11	6.08	5.96	7.33	6.13	5.99	6.24	7.01	7.69	5.23	4.89	5.28	5.06	4.84	4.78	4.58	6.46	5.14
Gm14446	0.42	0.47	0.26	0.5	0.41	0.45	0.32	0.31	0.42	0.39	0.39	4.51	7.59	1.18	1.21	1.4	2.28	2.94	4.03	16.17	14.1	3.28	1.63	5.19	4.82	33.65	32.73	30.83	2.81	12.86	22.85	10.95
Gm16907	3.54	4.07	3.96	4.26	3.76	6.04	3.17	3.77	6.22	4.92	5.12	2.71	2.84	2.81	2.07	2.36	3.08	2.76	2.65	2.46	1.92	2.76	2.15	2.22	2.21	1.97	2.03	2.33	1.56	1.73	1.79	2.04
Gm4759	0.38	0.48	0.5	0.52	0.51	0.39	0.74	0.27	0.5	0.69	0.91	1.46	2.03	0.63	0.72	1.2	1	1.26	1.52	2.97	3.03	1.76	1.12	2.08	1.79	4.58	4.18	4.36	1	2.2	2.9	2.88
Gm4951	0.04	0.11	0.13	0.04	0.05	0.11	0.07	0.03	0.02	0.14	0.02	0.31	0.61	0.11	0.09	0.21	0.37	0.24	0.4	1.59	1.8	0.33	0.16	0.6	0.6	7.24	7.15	5.78	0.33	1.74	3.18	2.01
Gm5086	2.1	2.48	1.3	1.75	1.41	1.37	1.47	1.3	1.74	2.21	1.54	2.02	2.16	1.71	1.56	1.55	1.9	3.22	3.33	3.71	3.39	2.62	2.02	4.41	2.48	4.35	3.59	5.61	2.34	3.14	3.29	3.52
Gm5150	3.13	2.47	1.99	1.84	2.3	1.34	2.78	2.05	2.34	2.61	1.18	3.19	2.9	2.47	2.34	2.87	2.56	3.55	3.31	2.37	4.03	7.66	3.93	3.99	4.32	7.25	8.21	6.45	9.43	6.76	5.69	5.43
Gm5431	2.32	2.36	2.34	2.16	2.29	1.73	2.02	1.69	1.97	1.84	2.17	4.94	6.37	1.91	2.16	2.4	3.6	4.44	4.88	12.72	12.67	3.43	2.91	7.11	6.3	26.26	26.49	24.57	4.96	12.42	15.77	12.99
Gm6548	82.45	79.74	78.03	78.54	78.84	73.88	82.33	81.76	79.58	78.03	80.74	81.1	84.48	75.72	77	81.47	83.5	82.44	80.83	95.63	99.26	90.05	83.26	91.36	93.64	111.98	110.92	105.51	90.36	101.88	105.87	101.37
Gm6904	0.75	1.66	1.35	1.59	1.53	0.97	1.51	0.93	1.71	1	1.79	1.99	2.69	0.96	1.02	1.44	1.62	1.77	2.2	8.92	8.91	2.43	1.31	3.8	4.49	22.47	21.08	19.22	2.32	7.94	11.92	7.48
Gm7609	1.63	1.72	1.74	1.67	1.81	1.79	2.26	1.61	1.77	1.52	1.96	2.43	2.92	1.69	1.58	1.92	2.09	1.6	2	6.86	6.32	2.18	1.99	4.04	3.88	11.58	11.24	9.72	2.74	6.6	7.62	7.5
Gm8615	4.97	5.38	6.14	5.33	5.31	4.6	4.9	5.14	4.81	4.57	6.28	4.69	4.99	4.66	4.42	4.07	4.7	5.37	4.82	6.5	6.43	5.68	5.21	6.34	6.44	8.98	8.41	8.48	7.92	7.22	8.81	7.74
Gm8979	3.27	3.95	3.35	3.54	3.61	4.36	3.23	3.48	3.53	3.34	3.94	10.95	14.57	5.53	6.13	6.68	8.17	9.85	10.82	27.91	27.87	10.05	7.23	15.29	16.04	44.56	42.71	38.59	7.13	24.39	29.23	25.86
Gm9159	0.98	0.77	0.89	1.31	1.24	1.32	1.33	1.16	1.05	0.67	1.14	1.09	1.08	0.99	0.83	0.99	1.08	0.48	0.76	1.48	1.34	0.89	0.94	1.04	1.09	2.12	2.32	1.85	1.03	1.65	1.49	1.63
Gnl3	50.42	48.41	47.85	47.58	50.89	51.97	52.28	50.51	45.95	52.29	52.28	49.84	46.72	60.01	58.77	61.69	53.52	52.34	50.98	36.4	38.64	53.87	51.85	42.73	44.9	21.12	21.43	21.81	35.13	30.18	30.44	29.55
Golga3	10.77	10.39	10.52	10.79	11.25	10.73	10.89	11.28	10.85	10.63	10.72	15.42	17.23	13.88	13.88	14.4	14.27	15.63	14.4	17.76	18.33	12.63	13.03	14.02	15.04	23.47	21.97	21.65	12.43	16.2	18.5	15.82
Gpr126	2.43	2.54	1.96	2.15	2.27	2.07	2.25	2.05	1.89	1.78	1.99	0.77	0.84	0.99	0.98	0.9	0.95	0.98	1.1	1.41	1.47	1.29	1.54	1.5	1.58	1.41	1.11	1.27	1.66	1.34	1.14	1.36
Gpr157	2.62	2.55	2.59	2.8	2.48	2.48	2.23	2.33	2.54	2.09	2.18	1.55	1.49	1.65	1.43	1.3	1.37	1.56	1.7	1.57	1.37	0.87	1.3	1.58	1.39	1.39	1.61	1.49	1.47	1.22	1.25	1.54
Gpr160	1.6	1.6	1.85	1.73	1.57	1.37	1.17	1.33	1.33	1.73	1.15	0.53	1.03	0.39	0.55	0.48	0.33	0.55	0.18	0.62	0.73	0.35	0.37	0.76	0.68	1.89	1.27	1.28	0.93	1.16	1.22	1.15
Gpr56	1.88	2.48	1.81	2.06	2.22	1.54	2.09	1.87	2.17	2.45	1.89	1.37	1.16	1.21	1.5	1.16	1.4	1.14	1.15	1.11	1.17	1.48	1.23	1.23	1.43	1.1	1.09	0.97	1.04	0.7	1.01	1.23
Gpr84	102.87	143.79	148.68	169.29	168.65	234.95	240.74	256.22	135.42	141.66	145.18	201.35	191.82	325.22	325.23	333.99	212.74	214.96	223.53	151.13	157.18	263.25	239.36	208.06	227.26	75.48	83.18	76.14	96.1	130.23	118.83	117.37
Gsdmd	24.89	28.65	26.41	27.13	26.75	26.34	26.16	28.87	30.26	24.25	26.85	28.55	29.94	27.47	32.2	31.09	30.65	28.43	30.88	41.72	41.97	35.91	34.79	36.41	39.06	56.88	57.97	58.83	43.23	48.35	56.65	45.86
Gtf2ird1	6.32	5.52	5.81	6.15	6.07	5.06	5.61	5.82	6.2	4.78	5.06	3.25	3.72	2.79	3.04	2.77	4.11	3.45	3.8	4.03	3.72	4.29	3.27	3.19	3.19	3.1	3.37	3.26	3.83	3.33	3.49	3.78
Gvin1	1.18	1.01	0.87	0.93	0.83	1	0.87	1.74	1.3	0.86	1.03	3.15	4.25	1.52	1.76	1.83	2.13	2.7	3.13	8.97	9.3	2.83	2.03	4.86	5.12	14.6	14.86	14.16	2.27	8.17	9.09	9.52
Gys1	6.86	6.93	6.59	6.2	6.75	6.38	6.87	6.83	7.14	6.5	7.62	17.96	17.15	19.67	20.49	21.1	16.78	15.53	16.29	14.15	14.36	19.57	18.96	14.75	16.2	10.41	9.98	10	14.05	13.35	12.82	11.83
H2-DMa	6.66	6.87	6.92	6.28	6.36	5.34	6.94	6.17	6.21	5.85	6	3.32	3.19	3.12	3.62	3.25	3.73	3.91	3.52	4.24	3.81	2.87	3.41	3.1	3.31	5.26	4.95	4.4	3.97	2.96	4.21	3.89
H2-M2	0.12	0.04	0.34	0.21	0.22	0.52	0.43	0.78	0.44	0.49	0.33	0.94	0.5	1.37	0.91	1.24	0.43	0.75	0.51	0.86	0.91	2.73	2.54	1.15	1.03	1.31	1.11	1.3	2.83	2.35	2.32	2.04
H2-Q5	15.75	18.55	21.01	18.89	18.09	17.49	14.78	18.38	20.45	17.11	16.84	17.87	17.66	18.32	18.61	15.45	17.8	18.01	19.76	22.03	22.31	20.08	19.61	17.49	14.34	25.78	25.76	23.96	17.55	23.58	22.44	18.43
H2-T10	5.25	6.06	5.74	5.44	5.33	5.11	5.44	4.89	5.33	5.13	6.5	5.99	6.16	4.69	4.55	5.04	5.77	5.87	4.89	9.45	9.85	7.43	5.33	6.09	7.12	16.57	16.63	15.36	5.88	10.77	12.67	10.24
H2-T22	8.97	10.04	8.72	6.49	10.65	8.26	10.83	11.13	12.2	8.84	11.5	12.2	15.12	11.08	7.89	9.95	10.79	12.55	13.29	24.09	20.93	20.24	9.85	17.96	13.44	43.24	39.64	37.18	12.77	23.66	27.7	23.47
H2-T23	58.85	73.18	67.37	67.37	68.63	57.61	66.49	65.65	69.37	66.58	64.7	65.58	73.84	56	58.39	56.92	59.97	62.95	70.74	106.41	115.52	65.37	56.7	74.23	76.88	243.37	242.7	227.39	77.28	138.51	166.8	124.97
H2-T24	3.72	4.78	4.39	3.87	4.07	4.1	4.13	4.4	4.54	3.71	5.05	6.7	8.64	4.63	4.68	5.12	4.91	6.72	6.69	20.86	24.48	8	7.15	12.13	14.3	59.31	60.62	58.11	9.97	32.49	35.86	29.1
H2-T9	13.39	16.31	16.88	18.06	13.89	14.05	13.92	12.69	11.94	15.96	15.03	15.57	14.64	10.28	15.13	14.06	14.79	15.05	13.61	19.79	25.79	12.84	13.92	14.51	19.21	44.16	49.67	44.17	17.3	27.12	35.83	25.4
H60b	8.48	8.67	7.87	8.31	9.02	7.87	9.23	8.31	8.16	8.93	8.45	4.38	3.66	3.89	3.41	4.49	3.85	5.34	3.73	3.28	3.73	6.47	3.87	4.15	4.92	3.56	2.5	2.08	2.73	2.84	1.81	2.86
Hbp1	20.56	19.73	18.46	18.23	19.22	19.35	20.45	20.13	19.09	19.01	19.89	22.35	25.21	22.46	23.08	25.09	26.42	26.46	26.25	25.51	27.51	25.77	26.79	25.66	25.92	39.06	37.57	36.66	33.82	36.46	36.88	36.18
Hck	56.89	59.85	58.61	59.43	61.52	61.89	64.05	65.58	57.87	58.88	61.3	77.55	81.03	82.58	82.93	82.96	70.64	77	76.88	111.6	119.24	108.66	101.58	104.16	112.71	129.35	127.24	126.76	95.06	117.24	116.35	111.09
Helz2	4.93	6.27	5.53	5.84	5.89	7.84	6.79	6.61	6.01	5.35	6.31	11.07	14.07	7.2	7.41	7.95	7.42	8.7	11.12	24.23	24.99	10.85	9.29	16.91	16.62	40.32	38.17	36.85	10.71	22.96	25.42	24.06
Herc6	2.56	2.99	2.39	2.58	2.7	2.51	2.85	2.55	2.9	2.42	2.91	5.42	7.45	3	3.61	3.73	3.88	4.75	5.29	16.55	18.6	7.02	4.12	10.04	10.27	39.99	37.83	33.38	6.19	18.14	22.39	17.96
Herpud1	16.45	18.95	19.83	22.06	19.22	24.13	27.78	26.76	18.27	19.75	19.25	31.94	35.67	36.05	37.83	37.06	39	35.2	39.82	27.52	28.56	32.07	27.59	29.23	29.74	25.97	27.74	27.67	29.73	29.16	30.06	31.79
Hgf	5.38	4.85	4.98	4.2	4.44	4.09	4.64	4.19	5.27	4.46	5.41	1.86	2.08	1.23	1.29	1.52	2.1	1.63	1.84	1.84	1.69	1.33	0.95	1.61	1.64	2.91	3.32	2.5	2.38	2.67	2.89	2.55
Hipk2	8.38	8.57	10.02	9.36	10.05	8.28	7.52	8.83	9.12	8.69	9.18	6.76	7.05	7.57	6.39	5.69	6.49	5.93	6.2	5.88	5.56	6.03	6.06	5.19	4.85	5.06	4.71	5.25	4.84	4.92	4.14	3.41
Hist1h1c	46.28	42.11	49.65	48.92	43.56	43.11	42.34	48.28	55.54	50.87	52.44	53.69	52.63	44.33	45.27	42.5	50.36	48.72	51	32.24	30.15	21.85	22.91	22.8	23.01	20.53	21.79	21.44	20.05	21.07	19.7	19.02
Hist1h2ab	3.36	2.28	3.59	3.12	3.8	1.08	1.78	2.5	9.09	5.87	1.5	6.44	5.19	4.53	4.28	0.81	2.77	2.25	10.94	7.93	6.83	1.86	4.15	3	1.35	5.62	6.56	5.28	8.27	7.35	3.9	1.77
Hist1h2ad	5.66	3.6	5.88	5.39	6.24	1.86	2.94	4.34	15.13	9.92	2.6	11.2	9.79	8.41	7.08	1.66	4.82	3.92	19.68	14.62	11.75	2.98	7.11	4.92	2.07	9.23	11.7	8.91	14.67	12.74	7.11	2.51
Hist1h2af	3.16	1.82	4.59	3.58	4.15	0.9	1.91	2.79	11.14	6.07	1.62	8.44	7.43	6.02	5.35	1.04	2.98	2.09	15.31	10.99	9.37	1.57	6.14	3.09	1.15	7.8	7.77	6.68	10.98	9.49	5.33	1.52
Hist1h2ag	5.6	2.99	6.71	5.91	6.6	1.7	2.94	4.41	16.17	9.75	2.75	12.29	10.23	9.02	7.73	1.87	4.77	3.58	21	16.46	13.26	4.17	7.51	4.69	1.88	11.23	12.01	10.03	16.09	13.86	8.19	3.01
Hist1h2ah	5.49	3.58	5.89	5.45	6.39	1.91	2.95	4.31	14.83	10.05	2.43	11.26	9.56	8.43	7.58	1.56	4.92	3.92	19.38	14.56	12.03	2.63	7.91	5.15	2.2	9.03	11.61	9.37	15.23	13.27	7.45	2.46
Hist1h2ai	5.65	3.42	6.01	5.27	5.91	1.64	2.85	3.89	13.98	9.25	2.63	10.94	8.83	7.84	6.83	1.38	4.98	3.86	18.77	13.6	11.48	2.17	6.92	4.72	2.14	8.51	10.7	8.4	13.95	11.89	6.91	2.4
Hist1h2ao	11.89	7.69	14.39	13.9	14.32	5.44	8.62	11.04	28.46	21.45	7.83	21.99	17.68	16.74	13.28	4.2	11.08	7.47	31.01	25.36	21.16	6.77	16.52	12.19	5.88	19.78	22.83	19.6	28.91	35.64	15.4	6.56
Hist1h2bg	5.87	5.44	6.23	6.28	5.02	5	4.94	6.12	7.08	6.64	5.4	6.25	7.37	5.58	6.66	4.84	5.86	7.19	8.41	5.79	5.57	2.7	3.75	3.48	2.93	4.12	3.95	3.24	3.61	2.87	2.9	2.28
Hist1h4i	3.44	5.21	6.15	3.07	4.17	3.13	2.75	3.38	4.55	4.79	2.86	6.99	4.25	3.64	4.68	3.03	4.19	2.38	6.16	5.6	5.33	2.36	3.11	2.17	2.21	4.73	4.22	5.73	4.44	4.03	2.02	2.58
Hist3h2a	4.85	3.82	4.64	4.36	3.48	3.74	3.68	3.7	4.49	4.08	4.15	5.85	5.15	4.4	5.36	4.53	4.97	4.94	5.78	6.4	6.16	3.8	4.25	4.15	4.14	9.15	8.74	8.71	5.69	6.96	7.64	6.07
Hivep2	2.8	3.14	3.24	3.57	3.2	4.23	4.44	4.31	3.01	3.1	3.39	1.32	1.65	1.69	1.68	1.75	1.81	1.56	1.67	1.44	1.39	1.73	1.38	1.71	1.6	1.09	0.99	1.04	1.03	1.1	1.09	1.14
Hivep3	2.19	2.88	3.24	3.65	3.75	4.6	4.38	4.68	3.19	2.89	3.26	2.03	2.1	2.78	2.72	2.56	2.29	2.1	2.18	1.69	1.41	1.81	1.47	1.68	1.79	1.07	1.16	0.84	0.97	1.07	1.24	1.24
Hmga2-ps1	29.64	27.27	31	28.02	28.28	27.11	29.19	28.2	29.91	27.98	28.96	22.4	23.04	20.39	19.93	17.95	19.85	21.07	22.18	19.39	19.59	13.62	14.27	17.35	16.34	15.8	17.18	17.18	13.92	14.07	14.61	14.24
Hmgb3	45.79	44.52	40.26	39.29	42.86	38.28	42.4	37.9	34.43	40.65	40.49	26.94	24.42	23.58	21.37	25.06	24.61	25.01	24.76	19.32	21.22	19.65	22.77	23.8	22.73	17.02	16.46	17.08	22.95	17.48	19.9	23.8
Hmgcr	57.15	57.15	55.9	56.34	59.27	59	62.31	62.41	53.21	55.94	56.32	28.15	27.27	27.93	29.26	28.78	27.58	28.63	27.23	31.19	29.63	30.17	30.05	32.64	33.07	27.91	29.61	28.41	25.59	27.26	27.94	30.32
Hmgcs1	89.59	99.89	92.82	93	98.23	92.46	102.25	93.32	85.76	90.66	90.57	24.11	24.58	23.34	23.65	24.82	24.39	25.22	23.55	33.25	33.1	29.99	26.71	32.74	35.91	41.65	45.81	40.37	31.07	32.01	36.66	36.56
Hmox1	1125.69	1011.2	1003.2	983.89	993.55	919.02	917.65	937.46	932.7	994.28	972.02	614.44	621.37	640.55	612.31	634.65	652.12	703.44	627.26	698.08	667.09	808.98	809.19	691.24	753.23	421.34	409.21	427.62	595.47	597.75	538.15	562.49
Hmox2	58.48	62.91	57.96	57.95	64.21	53.6	59.81	54.4	56.59	61.98	60.54	65.22	65.57	55.72	55.74	56.12	64.75	68.73	58.95	82.95	90.62	61.51	57.08	72.61	77.73	127.28	125.42	125.43	76.14	88.19	106.01	94.33
Hnrnph3	4.35	4.87	4.98	4.51	5.6	4.29	4.37	5.5	4.17	4.27	4.24	7.84	7.52	8	7.69	8.48	7.69	8.2	8.07	7.04	7.98	10.5	8.99	9.41	10.21	7.29	6.77	7.48	7.99	7.93	7.61	8.01
Hnrpdl	79.21	79.34	76.46	78.41	80.48	74.68	78.1	73.82	71.59	74.23	71.08	32.7	30.23	32.88	31.5	32.46	32.23	32.46	31.91	29.8	27.91	33.67	33.01	31.22	32.31	29.45	30.02	31.56	32.49	31.46	32.91	34.25
Hp	0	0.14	0.15	0.05	0.09	0.13	0.11	0.16	0	0.25	0.11	0.39	0.51	1.3	1.08	1.81	0.58	0.16	0.72	0.92	0.78	4.33	3.22	0.92	1.1	1.33	2.4	1.51	4.53	2.48	3.35	1.82
Hpgd	15.93	16.25	14.83	13.13	14.09	11.26	11.71	12.18	13	12.03	12.95	9.45	11.64	4.89	5.71	5.81	12.84	12.11	14.36	12	11.21	4.99	4.95	10.83	8.7	19.51	18.54	18.86	13.27	17.47	16.52	17.49
Hpgds	52.84	55.99	54.82	52.09	53.03	49.53	51.75	48.65	47.49	51.69	51.31	25.66	26.45	20.69	21.66	20.4	28.97	28.72	25.59	29.42	28.37	21.42	19.01	27.35	26.97	43.78	39.83	42.69	29.97	32.36	32.94	34.78
Hsd17b7	19.29	20.11	19.59	19.68	19.79	19.31	19.87	21.19	19.37	20.36	21.86	9.08	9.31	9.15	8.85	9.16	8.69	8.45	7.94	7.43	6.76	6.62	6.97	6.91	7.28	6.58	6.38	6.46	6.01	5.58	5.33	6.23
Hspa1a	1.21	0.98	1.52	1.54	1.57	1.9	1.7	1.9	1.98	1.79	0.83	3.8	3.3	5.77	4.65	3.59	2.04	2.53	4.91	6.61	6.69	4.01	6.82	3.62	3.45	6.33	7.82	6.3	4.68	7.48	6.93	4.08
Hspa1b	1.45	1.36	1.96	2.02	2.33	2.24	2.47	2.83	2.79	2.36	1.65	5.38	4.65	7.85	7.16	5	3.43	3.97	6.79	8.07	8.84	5.85	9.37	4.89	5.08	7.68	10.34	8.99	6.59	9.42	8.86	5.68
Hspa5	309.27	315.71	307.48	320.46	319.92	293.29	321.67	328.67	309.64	306.38	315.93	618.68	648.57	604.85	614.82	632.72	671.09	681.69	683.31	602.26	636.11	501.12	515.4	544.41	571.39	782.85	779.45	791.85	536.75	626.43	688	630.65
Hspa8	833.45	833.07	832.28	820.82	826.29	776.17	852.48	851.36	823.85	847.58	878.14	1418.56	1432.78	1484.25	1507.12	1554.85	1493.99	1500.54	1494.65	1765.04	1881.82	1978.36	1989.29	1882.33	1921.52	1594.61	1605.5	1637.11	1553.35	1644.97	1677.74	1613.38
Hsph1	16.23	15.17	15.89	16.46	15.75	16.73	15.44	17.8	16.46	15.77	17.9	37.79	36.77	43.89	44.39	42.58	39.17	38.89	41.59	39.2	39.97	45.34	44.69	39.66	41.7	33.05	34.29	36.2	39.46	38.69	41.87	37.49
I830012O16Rik	0.97	1.11	0.95	0.98	1.2	2.06	1.1	1.47	1.12	1.06	1.27	22.06	32.11	3.89	5.87	5.85	11.05	14.8	15.92	72.2	71.09	9.52	5.35	25.64	25.21	171.35	167.9	154.76	7.72	55.3	86.29	47.83
Icosl	20.95	28.61	24.8	28.35	29.99	33.76	37.8	33.91	20.77	22.43	20.93	8.11	8.8	12.16	12.31	12.49	10.02	10.36	10	9.65	10.08	11.51	9.62	10.26	12.6	10.26	11.3	9.69	6.86	9.78	10.01	9.69
Id1	78.53	65.91	80.33	71.13	66.8	44.62	51.67	53.27	91.9	78.42	57.11	60.78	61.46	43.03	44.83	28.32	45.53	42.64	65.17	70.53	59.66	27.81	32.92	41.66	28.3	46.47	40.61	41.2	34.97	34.93	27.67	24.52
Id2	130.12	127.24	114.39	117.92	116.11	101.49	110.77	97.06	109.41	121.26	124.01	70.11	72.61	55.37	55.78	62.34	85.85	82.75	71.98	89.33	81.09	58.41	60.31	77.92	83.11	91.99	91.09	86.46	69.57	83.03	78.61	75.35
Id3	77.93	79.14	99.82	87.5	82.19	66.37	71.62	78.29	101.59	81.35	70.26	117.21	112.91	107.3	107.3	88.06	113.3	105.88	136.34	142.17	150.15	79.85	108.04	121.73	103.18	193.15	189.37	174.71	151.51	167.24	163.75	133.17
Idi1	64.54	68.22	65.53	63.39	62.52	63.02	69.25	66.08	62.46	65.63	69.03	34.94	36.92	34.55	36.29	38.28	41.83	41.46	36.11	31	30.59	25.13	25.94	34.19	33.82	43.76	40.34	40.28	32.71	34.34	40.41	38.29
Ifi203	7.91	10.94	9.35	11.38	10.95	17.2	15.95	16.01	9.29	9.8	10.68	19.2	26.23	18.03	19.16	21.68	14.92	17.91	17.59	45.23	49.97	22.13	15.49	32.8	32.92	83.71	80.07	75.44	15.34	45.49	55.4	49.5
Ifi204	16.22	22.39	16.96	20.94	18.1	18.8	20.52	20.33	17.74	18.79	19.79	31.44	46.92	16.64	19.45	21.44	22.89	26.57	29.31	104.81	118.69	33.03	21.48	55.22	61.76	254.78	245.41	225.3	29.4	107.62	142.58	104.92
Ifi205	5.49	7.25	6.28	7.04	6.62	8.66	9.14	9.33	5.84	5.98	6.89	16.95	24.33	11.04	13.92	15.84	12.98	14.08	15.79	56.39	57.08	21.41	12.95	26.96	32.63	106.73	109.5	90.24	12.99	49.05	66.66	47.51
Ifi27l2a	196.56	232.87	220.03	204.72	200.4	188.19	211.05	194.96	227.51	209.43	243.11	215.59	234.64	175.13	212.18	208.33	235.99	210.39	201.25	283.83	304.56	206.45	163.69	251.12	236.77	633.73	608.76	590.09	241.16	376.78	484.36	403.67
Ifi35	22.48	24.99	19.68	23.63	22.71	20.25	22.13	22.97	21.13	22.21	21.25	32.95	39.68	25.48	27.52	26.74	28.15	29.74	32.78	72.39	80.33	40.95	32.08	52.99	58.03	120.89	115.23	114.5	39.75	77.86	92.87	76.65
Ifi44	0.17	0.28	0.19	0.22	0.17	0.16	0.47	0.18	0.11	0.12	0.32	0.74	1.1	0.38	0.42	0.58	0.5	0.54	0.51	5.61	5.39	0.77	0.32	2.16	2.27	23.45	23.46	21.81	0.94	6.07	9.91	5.81
Ifi47	4.69	6.37	5.01	4.99	5.57	5.1	5.08	4.4	4.56	5.73	5.01	18.21	26.35	6.52	8.06	8.89	10.82	14.12	15.54	58.91	64.03	15.4	8.32	28.1	28.78	149.72	149.49	129.22	13.59	57.91	82.81	56.74
Ifih1	4.81	4.7	4.57	4.47	4.77	4.87	4.65	4.76	4.83	5.21	4.85	7.59	10.39	4.84	5.07	5.19	5.83	6.72	7.09	19.71	21.19	7.05	4.83	12.1	12.52	37.97	37.56	34.02	7.48	18.85	23.05	18.87
Ifit1	1.66	1.69	1.27	2.19	2.31	3.86	1.93	2.38	1.75	2.1	2.1	38.17	52.71	6.48	9.38	10.61	20.4	24.39	30.14	84.64	88.47	14.65	9.58	34.84	35.52	146.27	148.57	138.4	13.62	74.6	108.22	67.19
Ifit2	2.73	3.2	2.63	2.36	3.02	4.08	2.69	2.89	2.81	3.2	2.47	25.31	38.03	5.29	8	9.79	15.23	18.1	19.43	93.12	89.7	11.88	8.81	31.85	34.41	243.65	236.57	210.35	11.89	73.6	115.77	66.15
Ifit3	1.92	3	2.6	2.23	2.73	5.09	2.73	2.91	2.65	2.79	2.76	44.7	67.87	8.04	11.59	12.29	21.4	30.58	31.93	151.07	153.17	17.89	11.73	53.49	53.71	363.85	357.19	329.73	17.09	121.29	185.3	107.66
Ifitm3	343.96	368.08	352.46	348.16	340.4	319.12	361.23	364.61	337.07	343.16	372.62	374.39	434.48	325.48	348.78	359.47	376.37	419.44	399.7	739	784.14	495.08	422.73	568.3	629.73	1573.35	1575.08	1540.79	633.65	1083.59	1221.14	1035.36
Ifitm6	5.08	4.01	5.08	4.11	3.66	4.83	5.09	4.92	4.98	4.61	4.12	4.52	6.32	4.37	3.93	5.62	4.79	6.85	3.92	7.84	10.38	8.31	6.55	10.02	6.74	14.95	21.03	19.79	8.87	13.92	17.59	12.16
Ifrd2	11.22	11.41	11.67	11.94	12.09	11.29	10.78	13.37	13.35	14.12	11.8	22.75	20.43	24.42	27.32	23.71	20.38	20.47	22.53	15.32	17.74	20.86	22.29	17.13	16.96	11.75	11.88	11.7	18.46	14.33	15.09	13.57
Ift172	3.03	2.78	3.05	3.46	3	2.97	2.97	3.04	3.41	3.39	3.09	4.84	5.27	4.79	5.03	4.6	4.99	4.76	5.4	5.15	5.21	4.43	3.96	4.93	5.33	5.75	5.86	5.58	4.26	4.87	5.19	5.15
Ift57	7.78	7.63	7.13	8.32	7.8	8.74	8.84	8.73	7.9	8.28	8.23	10.81	10.14	13.45	12.88	14.29	10.29	9.73	11.19	11.14	10.73	17.22	13.98	11.34	11.88	9.49	9.37	8.74	10.99	10.21	9.82	11.18
Igf1r	2.15	2.16	2.17	2.06	2.3	1.78	1.93	1.91	1.65	1.63	1.82	1.12	1.12	1.09	0.93	1	1.02	1.05	1.05	1.23	1.12	1.05	1.37	1	1.13	0.72	0.74	0.76	1.16	0.91	1.04	1.01
Igfbp4	97.02	106.46	114.04	97.42	102.52	84.14	94.08	93.81	96.23	96.2	84.46	76.81	73.57	62.25	63.65	57.29	73.12	70.29	75.45	68.87	67.99	49.76	50.96	58.95	55.98	66.66	62.66	61.18	64.86	61.11	59.64	56.97
Igsf11	1.18	1.23	1.34	1.19	1.3	1.09	1.18	1.43	1.18	1.73	1.35	1.7	1.76	1.74	2.13	2.67	2.13	2.21	1.69	2.13	2.09	2.69	2.43	1.97	1.7	1.95	1.96	1.85	1.86	1.55	1.7	1.61
Igsf6	44.75	52.86	49.94	53.5	53.37	72.61	74.34	74.89	47.99	51.33	52.97	92.77	86.26	129.26	126.69	140.89	89.9	92.98	96.79	81.39	90.19	148.66	127.84	105.3	112.86	86.66	87.47	85.72	105.44	111.49	115.29	104.61
Igsf9	1.74	1.42	1.12	1.87	1.75	1.34	1.51	1.61	2.15	1.9	1.54	0.87	1.24	0.79	0.98	0.78	0.81	0.88	1.04	0.89	0.79	0.4	0.69	0.92	0.75	0.89	0.87	0.74	0.47	0.8	0.69	0.77
Igtp	5.4	6.72	6.59	6.11	5.54	5.62	5.12	5.28	5.92	5.56	5.91	14.99	21.13	6.86	6.9	7.74	9.58	10.46	13.31	39.93	43.29	13.7	8.91	21.41	21.78	81.77	81.67	70.49	12.46	40.31	51.49	39.03
Iigp1	0.07	0.12	0	0.02	0.02	0.1	0	0.12	0.03	0.05	0.07	0.78	0.86	0.17	0.21	0.28	0.41	0.54	0.65	2.91	2.95	0.43	0.34	1.33	0.98	8.74	8.87	8.33	0.42	2.11	4.8	2.41
Ikbke	10.63	13.48	14.1	16.29	14.62	24.13	18.45	20.21	16.35	14.16	16.96	23.63	22.68	30.29	30.1	29.31	23.5	22.84	23.69	25.58	25.26	35.8	33.79	29.67	29.22	27.04	27.24	26.24	28.92	32.35	31.96	30.54
Il10	1.63	1.12	1.52	1.58	1.45	1.62	1.93	1.57	1.66	2	1.89	1.56	2.91	1.82	1.79	1.94	2.19	2.46	2.31	3.85	2.97	2.6	2.85	2.22	2.46	3.34	3.43	2.15	2.43	2.77	3.26	2.08
Il15	6.83	5.89	5.85	6.41	6.41	6.52	5.65	5.96	5.34	6.09	5.77	11.41	12.3	6.56	7.37	7.61	7.8	10.02	9.75	17.63	18.36	8.48	8.15	15.08	11.46	26.69	26.69	25.2	9.21	14.82	22.06	17.18
Il17ra	24.57	25.84	26.73	24.58	24.64	25.61	24.44	24.79	27.72	25.94	27	20.35	19.58	20.28	19.68	20.23	20.65	20.49	19.94	17.18	17.27	16.96	19.8	17.29	17.73	12.42	11.72	11.92	13.83	12.84	12.33	13.88
Il18	3.42	5.04	4.76	3.85	4.68	3.08	3.16	3.41	3.7	3.38	3.5	5.86	5.89	5.28	5.65	5.37	5.1	6.51	6.81	11.9	12.52	5.08	4.3	10.29	10.3	19.4	17.91	16.35	6.37	10.55	15.27	12.68
Il18bp	0.73	0.76	0.84	0.95	0.82	1.26	0.92	0.59	1.1	0.65	1.19	1.03	1.1	0.81	0.85	1.05	0.42	1.05	1.14	2.21	2.24	0.65	0.73	0.99	1.53	5.99	5.34	4.28	1.04	1.92	3.2	2.04
Il1b	0.22	0.73	0.37	1.28	1.33	4.27	4.24	3.84	0.91	0.51	1.16	3.18	1.87	11.44	11.42	12.9	1.78	2.33	2.59	1.42	1.74	15.98	9.81	4.11	4.99	1.75	1.69	1.2	2.81	3.2	3.48	2.64
Il1rn	3.58	4.3	3.74	4.29	4.1	5.09	5.74	4.81	5.23	5.13	4.27	7.54	7.65	7.87	9.07	7.71	6.64	6.89	7.23	12.63	11	8.2	8.82	7.95	10.22	18.35	16.55	15.06	9.25	10.98	12.4	10.55
Il21r	11.42	11.96	12.43	12.17	11.38	9.79	10.03	9.92	12.75	13.85	11.99	3.86	4.23	2.09	2.34	2.14	2.97	2.87	3.03	5.97	5.95	2.52	2.22	3.95	4.25	9.95	11.34	10.61	3.69	6.08	6.75	5.46
Il2rg	34.58	37.13	40.5	38.42	38.02	41.99	44.68	47.21	34.82	37.01	40.31	47.44	48.35	60.21	58.07	62.44	48.05	47.61	44.36	58.37	57.83	73.27	72.35	56.15	59.59	72.05	77.9	76.05	88.71	81.53	84.53	75.59
Il4ra	28.83	30.34	28.14	27.25	30.03	23.03	26.32	24.37	24.95	27.21	25.59	12.35	12.07	9.93	10.17	10.23	12.2	10.98	11.07	13.6	12.3	12.75	11.25	12.27	12.87	13.91	13.41	12.99	13.9	13.16	12.43	13.29
Insig1	75.99	78.32	74.6	75.1	80.77	72.18	77.38	73.26	68.6	75.15	72.39	24.86	24.35	22.01	22.83	21.95	23.52	24.6	21.93	31.58	30.52	26.84	24.04	31.84	31.96	37.73	37.62	36.63	26.87	27.2	30.95	30.12
Irf1	11.56	12.28	12.61	13.93	14.07	16.11	17.8	17.58	13.43	14.43	12.98	24.77	29.28	21.58	22.52	23.58	22.64	24.79	27.86	35.09	38.69	27.45	20.89	29.33	30.32	44.66	49.02	47.36	21.97	36.01	43.66	34.5
Irf2bpl	23	19.44	21.86	22.54	22.93	17.72	17.61	18.37	24.64	23.41	18.57	22.84	21.89	20.37	19.66	14.04	17.09	15.44	22.06	18.68	18.39	9.18	15.36	13.92	12.33	12.75	12.77	12.34	12.36	10.95	8.88	8.33
Irf7	6.09	7.66	6.62	7.65	7.24	7.51	8.2	6.75	6.78	7.05	8.46	26.12	39.23	8.68	11.93	11.08	16.44	19.95	24.95	104.18	112.58	27.28	15.54	48.5	52.79	273.3	274.64	248.8	30.68	110.59	147.56	103.34
Irf8	57.34	53.34	58.02	55.15	51.99	44.13	47.6	50	63.24	64.96	58.89	55.66	53.81	42.56	45.21	39.57	54.88	51.72	53.88	39.68	41.17	24.66	31.01	34.31	31.73	35.33	34.21	35.2	30.65	31.85	28.66	28.35
Irf9	13.47	15.85	14.86	14.98	14.89	14.22	14.44	14.21	13.54	13.67	13.52	25.15	28.96	20.23	18.54	21.03	21.72	24.43	25.52	38.52	39.55	27.25	22.29	34.5	35.55	40.92	42.96	42.24	27.14	36.03	41.44	41.03
Irg1	4.35	7.59	7.44	10.51	9.76	23.58	25.36	25.88	6.63	6.79	6.64	23.37	28.05	51.29	52.64	59.56	26.01	24.04	25.94	59.79	44.26	74.75	53.4	39.03	51.75	59.86	62.58	52.05	27.62	56.47	67.58	51.84
Irgm1	12.29	14.08	11.27	12.94	12.26	14.06	12.35	13.26	12.53	12.23	12.47	39.75	50.27	15.29	16.73	19.18	27.31	32.14	36.29	86.09	94.77	28.31	19.86	51.55	54.17	153.15	154.18	149.01	31.18	87.38	111.19	87.03
Irgm2	4.45	5.33	4.8	4.17	4.46	4.85	4.15	4.12	3.62	4.07	3.74	12.99	17.98	4.49	5.44	6.42	7.99	9.98	12.08	29.46	33.23	9.25	6.32	17.88	18.28	59.52	61.23	56.49	11.79	34.53	42.85	32.34
Isg15	7.53	12.54	11.24	11.64	10.02	9.43	10.55	11.33	9.8	8.37	10.46	54.29	89.61	19.54	27.37	24.2	32.18	41.88	46.62	229.15	251.27	51.58	26.17	109.25	115.17	608.54	600.61	533.91	52.51	258.2	339.41	249.46
Isg20	1.16	0.59	1.33	1.09	0.93	0.82	0.76	1.46	0.83	1.32	1.1	2.9	4.88	1.06	1.63	2.54	1.68	2.09	2.49	17.81	15.41	3.77	1.59	6.62	5.84	51.72	49.5	40.23	4.32	17.18	23.09	14.93
Itga4	14.09	15.64	15.97	15.26	15.55	18.25	17.36	17.83	13.77	15.2	15.87	19.11	20.12	21.92	21.98	23.95	19.75	20.06	20.61	22.39	23.18	23.96	22.79	23.15	24.11	30.66	29.32	28.78	22.89	25.99	27.59	28.12
Itga8	1.59	1.6	1.86	1.47	1.91	1.42	1.73	1.41	1.39	1.35	1.54	1.12	1.41	1	1.06	0.91	1.28	1.2	1.09	1.01	1.07	0.56	0.98	0.91	1.26	0.94	0.74	1.09	1.45	1.37	0.88	1.4
Itga9	2	2.68	2.47	2.42	2.27	2.57	2.37	2.29	2.12	2.09	2.23	1.11	1.07	0.7	1.08	0.99	1.07	1.21	1.43	1.46	1.56	1.16	1.51	1.57	1.52	1.48	1.67	1.54	1.89	1.38	1.44	1.41
Itgb5	182.45	194.42	194.38	186.16	189.9	158.25	177.97	174.91	180.49	178.73	176.72	130.17	133.22	102.67	108.6	99.12	140.15	137.82	130.84	136.37	131.69	83.7	90.26	126.23	121.92	158.61	149.1	145.93	114.93	127.77	131.62	131.91
Itpkb	29.77	33.85	33.24	36.45	36.21	38.27	41.83	38.61	33.64	31.05	29.78	17.45	18.43	18.95	19.16	18.78	17.22	17.19	17.23	18.42	18.14	14.76	14.58	16.04	16.86	19.03	18.86	18.66	14.6	15.78	15.63	14.82
Itpr1	1.7	1.88	1.57	1.7	1.56	1.91	1.74	1.88	1.71	1.95	1.95	2.15	2.46	1.99	2.34	2.23	2.01	2.25	2.1	3.4	3.43	2.59	2.26	2.66	2.66	6.37	6.02	5.69	2.39	3.31	3.34	3.45
Jag1	35.69	35.56	34.34	38.73	38.11	50.08	48.6	49.46	31.5	33.37	34.31	30	28.22	45.38	42.46	43.65	28.2	31.14	27.56	18.73	19.64	32.63	31.36	23.46	26.38	8.47	8.79	8.19	11.49	13.65	11.02	12.99
Jdp2	19.06	22.28	23.37	23.73	24.63	36.31	38.31	39.81	17.92	19.22	18.74	26.75	25.31	53.18	52.96	57.83	26.2	25.44	30.95	24.17	24.76	50.07	46.08	33.39	36.95	12.65	13.05	13.45	24.2	23.65	22.07	21.8
Kank2	5.41	5.86	5.42	5.64	5.95	4.81	5.1	4.64	6.09	5.45	5.55	3.19	3.11	2.6	2.74	2.7	3.4	2.75	3.59	4.05	3.52	2.31	2.53	3.23	2.77	3.8	3.92	4.29	3.77	3.72	3.59	3.14
Kcna3	5.48	6.13	6.8	7.33	6.04	8.06	6.45	6.78	6.52	7.03	6.7	5.01	4.89	4.8	5.61	5.55	4.82	4.36	4.88	3.23	3.17	4.63	3.37	3.24	3.18	2.45	1.86	2.11	2.74	2.8	1.96	2.17
Kctd11	5.42	5.36	6.11	5.3	4.93	5.31	5.8	5.73	7.03	5.6	5.56	3.37	3	3.27	3.16	3.55	3.45	4.39	3.94	3.01	3.24	3.11	2.8	2.23	2.79	3.18	3.14	3.06	3.13	2.62	3.51	3.16
Kctd12b	2.13	1.52	1.83	1.44	1.73	1.26	1.37	1.43	1.62	1.91	1.96	1.77	1.55	1.29	1.3	1.45	1.78	2.01	1.51	2.52	2.34	1.54	1.83	2.29	2.01	3.92	3.67	3.71	4.12	4.08	3.96	3.85
Kctd9	18.14	18.05	17.72	17.42	18.26	17.42	16.99	18.33	16.48	17.82	16.76	10.86	10.4	10.68	11.52	12.02	13.2	11.76	11.52	8.89	8.53	9.8	10.19	9.2	9.27	7.45	6.81	7.59	9.32	7.89	8.12	8.71
Kdm6b	1.28	1.24	1.34	1.73	1.72	2.36	2.2	2.27	1.71	1.81	1.59	1.51	1.26	2.13	2.05	1.76	1	1.13	1.86	1.02	0.96	1.18	1.07	0.85	0.97	0.49	0.51	0.53	0.65	0.8	0.75	0.51
Kdr	0.61	0.6	0.61	0.53	0.5	0.47	0.54	0.53	0.54	0.52	0.63	0.58	0.61	0.39	0.36	0.37	0.64	0.24	0.51	1.88	1.8	0.4	0.51	0.94	0.78	3.45	3.79	3.62	0.57	1.08	2.2	1.25
Kif21b	11.52	11.56	12.39	11.88	11.53	10.56	9.86	10.41	14.06	12.19	13.39	7.17	7.06	5.84	6.3	5.59	7.47	7.15	6.97	6.41	5.85	4.85	4.98	5.98	5.5	5.96	5.78	5.75	5.45	5.35	5.39	5.89
Klf11	1.4	1.45	1.38	1.33	1.43	1.12	1.28	1.21	1.49	1.3	1.54	2.38	2.31	2.22	2.02	1.8	2.53	1.78	1.95	2.6	2.41	3.26	2.94	2.58	2.49	2.36	2.78	2.75	3.23	2.45	2.51	3.11
Klf2	4.66	4	4.53	3.55	4.2	2.95	3.18	3.39	4.43	4.31	4	9.52	8.78	8.59	8.68	6.29	7.62	7.4	10.67	10.14	10.03	7.28	7.15	7.74	7.12	10.35	9.54	9.33	8.64	9.6	7.94	6.38
Klhl24	3.47	3.24	3.23	3.43	3.08	3.7	3.45	3.45	3.82	3.43	3.95	4.03	4.07	3.5	3.48	3.43	4.76	5.17	4.09	5.29	5.35	4.94	4.53	5.13	5.09	8.67	8.58	8.81	8.26	7.64	8.32	8.14
Klhl25	12.92	14.01	13.67	13.33	13.49	12.72	13.3	12.3	12.47	13.32	12.36	8.63	8.23	7.98	8.32	8	9.4	8.85	8.34	8.55	8.41	6.39	7.15	8.22	7.71	7.53	8.73	7.42	7.69	7.79	8	8.23
Klhl3	2.95	2.61	1.95	2.83	2.64	1.6	1.66	2.17	3.16	2.74	2.56	2.67	2.18	1.92	2.03	1.74	2.33	2.33	1.47	1.97	1.92	0.54	1.14	2.02	1.61	1.36	1.24	1.69	1.47	0.72	0.85	1.04
Klra2	2.09	1.78	1.59	1.9	1.75	1.91	1.21	2.01	1.35	1.92	1.57	2.75	3.27	2.5	2.96	3.04	2.64	2.86	2.71	4.64	4.85	4.61	5.35	5.88	4.39	6.36	6.02	5.64	5.87	4.89	6.79	6.07
Lace1	1.72	1.94	1.82	1.92	1.51	1.82	1.95	1.91	2.03	1.7	1.81	3.32	3.85	3.04	3.51	3.41	3.21	3.33	3.54	3.77	3.53	3.39	3.32	3.65	3.95	2.81	3.54	3.64	3.33	3.39	3.58	3.37
Laptm4b	2	1.66	2.03	1.46	1.56	1.92	1.65	1.74	1.26	1.56	1.58	1.07	0.91	0.69	0.99	1.27	1.23	1.07	0.86	1.09	1.12	1.08	1.03	1.25	0.94	0.72	0.75	0.83	0.99	1.14	0.88	0.97
Lars2	31.11	41.22	61.72	56.79	39.81	110.01	41.99	40.49	49.19	46.17	42.53	42.68	51.32	71.82	54.81	61.27	51.97	53.18	58.38	53.59	53.68	57.54	60.14	63.19	50.3	62.91	57.4	69.25	57.81	68.7	58	113.94
Lcn2	0.09	0.13	0	0.55	0.63	0.65	0.29	0.61	0.44	0.11	0.2	0.13	0.24	1.27	1.46	2.12	0.51	0.83	0.56	0.19	0.41	6.77	3.26	0.74	0.86	0.58	0.85	0.33	3.83	1.85	1.66	1.24
Ldhb	2.54	2.95	3.69	2.53	3.27	2.63	2.84	2.9	2.22	2.55	2.78	1.83	1.84	1.43	1.28	1.56	2.07	1.49	2.51	1.73	1.86	0.96	1.29	1.87	1.42	2.57	2.19	2.57	2.12	1.9	2.41	2.18
Ldlr	70.15	74.1	70.52	74.74	77.83	71	74.45	74.18	72.16	71.83	68.12	24.54	24.49	24.72	26.79	25.48	22.75	23.61	23.4	36.12	34.14	31.82	32.5	35.45	35.79	38.22	36.93	34.89	30.19	34.42	34.85	33.42
Lgals3bp	138.66	167.93	141.3	156.77	154.2	135.02	159.28	151.53	149.91	152.06	164.31	163.5	174.9	142.35	164.04	156.5	159.2	170.4	163.48	259.77	276.43	190.21	158.54	198.98	206.47	509.87	528.22	490.9	202.46	357.71	384.33	315.42
Lgals9	49.03	60.5	52.72	54.95	57.32	48.95	55.39	49.34	51.61	54.88	59.62	52.63	60.33	34.36	38.32	38.26	44.49	49.61	50.64	107.22	117.21	49.65	36.82	68.8	79.61	233.24	227.97	216.77	58.18	131.38	151.6	124.69
Lilra6	12.82	13.13	13.89	13.33	12.81	13.38	12.83	13.86	12.16	12.68	13.65	13.05	14.92	15.26	14.88	16.54	13.95	14.85	14.89	19.58	19.67	26.22	23.16	20.51	20.36	25.33	26.07	24.39	26.99	26.99	28.71	26.77
Lilrb3	53.96	56.5	54.21	56.7	55.62	58.71	59.9	59.4	55.12	56.78	58.71	61.9	62.4	71.18	69.68	72.55	62.96	64.22	63.71	83.19	83.03	104.08	94.4	88.98	89.44	111.15	110.28	108.09	116.56	116.75	119.19	115.55
Lin7c	47.13	47.46	48.86	47.52	45.96	46.07	50.46	49.47	44.04	49.43	47.21	39.74	39.6	40.16	39.72	41.38	41.16	40.6	39.8	32.12	31.85	37.94	38.5	33.9	36.13	22.76	21.09	23.64	31.15	26.56	27.07	28.4
Lipe	4.32	4.21	4.82	4.85	4.19	3.99	4.72	5.11	4.76	4.83	4.84	6.24	5.74	5.4	5.14	4.85	5.49	5.51	5.42	7.35	7.6	6.59	6.38	5.86	6.63	11.48	10.15	9.49	7.8	8.41	8.47	7.61
LOC100038947	9.66	9.89	10.28	9.64	9.55	9.04	10.35	10.17	9.76	9.96	8.77	11.94	12.2	10.64	11.47	11.85	12.57	12.91	11.53	15.73	16.71	15.13	16.98	16.73	15.9	22.76	23.1	23.13	26.2	23.11	25.33	23.8
Lpar5	5.56	4.14	4.91	5.88	5.04	3.22	4.14	4.12	5.64	5.16	5.18	7.17	7.92	6.37	5.59	5.38	7.21	6.27	8.36	9.21	9.14	7.37	8.19	8.61	7.65	11.35	11.68	10.86	9.89	10.75	7.58	8.14
Lpin1	1.78	2.26	2.06	2.11	2.32	2.29	2.22	2.21	2.14	1.75	2.14	0.82	0.7	0.56	0.5	0.8	0.83	0.86	0.91	1.04	0.87	0.97	0.76	1.2	1.14	0.95	0.99	1.13	1.26	0.94	1.08	1.24
Lrfn4	3.06	2.87	3.04	3.32	2.72	2.14	2.45	2.58	3.13	2.55	2.39	2.74	2.11	2.24	2.51	1.73	2.04	2.24	2.33	1.25	1.56	1.16	1.56	1.67	1.41	1.45	1.07	0.85	1.84	1.46	1.28	1.27
Lrp12	22.78	24.18	22.24	22.54	23.94	20.23	22.18	21.51	20.51	22.52	20.61	10.07	10.92	10.4	9.52	9.79	11.03	12.05	9.92	10.68	10.05	8.68	10.34	10.09	10.41	8.93	9.31	9.43	9.03	8.47	7.93	8.95
Lrp8	21.11	20.71	20.53	19.82	21.25	19.03	18.44	18.62	19.88	20.17	19.36	9.38	8.4	8.4	7.9	8.29	8.84	9.05	8.01	7.08	6.37	6.1	6.75	6.94	7.05	4.44	4.05	4.24	5.79	4.81	4.64	5.19
Lrrc16a	5.61	5.85	6.08	6.58	5.94	7.69	6.91	7.33	6.98	6.74	6.66	11.74	11.1	12.97	12.88	13.12	12.29	12.74	12.09	11.08	11.63	13.69	12.7	12.32	12.32	7.66	7.68	7.51	7.35	8.08	7.74	8.36
Lrrc27	15.19	15.02	13.16	13.96	13.48	13.94	13.04	12.65	14.78	14.55	13.71	10.51	10.11	8.56	10.12	8.92	10.58	11.44	10.29	8.04	6.73	6.94	4.64	8.75	7.18	7.68	6.2	7.3	5.43	5.83	6.06	5.61
Lrrc8b	13.31	13.85	12.82	14.01	14.49	13.86	14.05	13.02	10.82	12.17	11.66	7.35	7.16	6.72	6.4	7.76	7.85	7.04	8.08	8.16	6.86	6.54	6.35	6.99	7.1	6.64	5.99	6.2	7.73	6.73	6.1	6.1
Lrrc8c	12.3	11.9	12.37	13.03	13.15	12.15	12.51	11.48	11.49	10.98	11.09	7.12	6.72	6.13	5.85	6.21	6.51	6.82	7.03	8.12	7.47	8.76	6.76	7.77	8.42	6.89	6.03	7.19	7.27	6.45	7.96	7.08
Lsp1	116.89	117.18	117.96	122.87	120.92	113.18	122.02	118.19	117.56	125.95	121.65	84.88	85.21	77.91	80.57	82.16	90.06	91.45	82.87	70.97	69.72	55.47	53.94	68.26	69.22	67.03	65.04	64.13	46.21	64.47	65.32	66.25
Lss	15.83	17.74	15.19	15.88	16.89	16.53	16.95	16.66	16.65	18.35	18.08	8.76	8.93	8.65	9.1	8.68	10.16	10.14	8.24	8.3	8.17	6.63	6.98	8.06	8.5	10.44	9.51	10.17	9.42	8.66	10.24	9.82
Lst1	48.52	47.89	53.34	54.11	58.21	48.95	56.51	47.98	54.58	48.77	44.95	43.88	43.08	39.28	45.81	49.85	41.76	45.67	41.03	53.45	56.37	69.44	59.94	59.36	61.67	93.95	107.47	108.12	98.35	102.17	99.76	86.42
Ly6a	2.16	2.7	3.35	2.64	3.34	2.27	3.3	2.64	2.2	1.98	2.93	2.17	2.08	1.12	1.15	1.8	2.18	1.26	2.99	5.11	5.2	1.12	0.89	2.61	2.31	25	27.37	21.73	1.37	6.94	10.48	8.78
Ly6e	86.08	112.56	97.75	105.81	101.46	90.54	105.5	96.21	98.43	97.24	104.25	105.53	123.07	89.15	98.11	96.83	108.43	104.78	110.43	207.74	220.07	115.93	99.66	147.63	163.68	527.38	551.66	529.46	141.17	326.33	360.81	291.15
Lyl1	15.24	15.01	14.65	14.43	15.06	9.74	9.01	10.98	17.13	14.43	13.15	8.36	8.63	5.66	5.89	5.14	7.58	6.79	8.19	9.23	9.12	4.74	6.38	7.32	6.59	10.82	11.46	12.03	9.69	10.85	9.68	9.66
Maf	26.81	27.58	28.4	25.23	26.26	17.33	21.03	18.84	25.02	25.98	25.12	20.95	23.2	13.52	13.79	13.06	19.18	18.57	20.42	35.9	34.27	22.26	23.5	26.88	25.7	59.11	58.71	53.24	49.44	46.59	47.64	41.57
Maff	5.14	5.9	6.2	7.42	7.39	10.79	9.63	8.66	6.86	6.01	6.99	3.81	3.67	5.38	4.99	5.8	3.66	2.72	4.35	2.43	2.43	3.1	3.44	3.09	2.74	0.8	0.93	1.16	1.45	1.01	1.87	1.77
Maml2	1.75	1.9	1.49	1.45	1.49	1.31	1.27	1.69	1.39	1.44	1.63	0.79	0.68	0.76	0.82	0.77	0.77	0.79	1.01	1.11	1.14	1.11	0.84	1.06	0.92	1.91	1.86	1.9	1.21	1.23	1.54	1.19
Map2k6	1.11	1.11	0.9	0.97	1.25	0.74	1.22	1.01	1.07	1.12	1.12	2.01	1.65	1.61	2.07	1.87	1.21	1.8	2.02	1.63	1.9	2.81	2.02	1.78	1.88	1.79	1.49	1.84	2.69	2.16	2.45	1.97
Map3k9	6.84	6.86	7.29	6.77	6.9	6.28	5.48	5.81	6.96	6.07	6.48	5.62	5.68	4.6	4.79	4.12	5.27	6	5.32	5.29	4.93	3.9	3.71	4.52	4.22	4.33	3.7	4.17	3.21	3.39	3.04	3.68
Marco	0.11	0.09	0.42	0.14	0.17	0.24	0.51	0.38	0.25	0.16	0.18	0.32	0.59	1.13	0.85	0.83	0.52	0.25	0.36	1	0.95	7.76	7.35	1.35	1.71	2.34	2.15	2.14	17.44	6.76	6.97	5.78
Matn2	1.71	1.5	1.42	1.35	1.46	1.25	1.52	1.43	1.25	1.22	1.17	0.94	0.98	0.77	0.7	0.83	0.89	1.23	1.25	1.01	1.01	0.79	0.85	0.86	0.91	0.72	0.41	0.81	0.97	0.77	0.86	1.18
Mbnl3	2.93	3.37	3.22	3.18	3.51	2.98	3.2	3.14	2.81	2.82	2.72	1.89	1.73	1.81	1.82	1.81	2.14	1.75	1.78	2.17	2	1.92	2.31	2.16	2.16	1.38	1.37	1.54	1.89	1.76	1.65	1.68
Mcoln2	9.96	11.44	12.36	11.88	11.46	14.27	14.65	13.91	10.59	10.61	12.33	4.63	4.86	6.68	6.32	7.43	5.65	4.9	4.78	7.29	6.39	7.81	9.46	7.7	8.4	8.32	7.71	7.7	8.1	7.86	9.03	8.84
Mctp1	7.71	7.31	7.71	7.52	6.59	7.25	7.26	7.61	7.07	6.71	7.32	7.62	6.87	6.64	6.7	6.88	6.81	7.15	7.19	4.88	4.89	3.14	4.51	5.2	5.52	4.49	4.71	4.06	4.27	4.41	4.61	5.14
Mefv	0.72	0.99	0.94	0.83	0.94	1.47	1.33	1.37	0.77	0.75	0.91	1.39	1.41	2.19	2.06	3.16	1.06	1.67	1.71	1.42	1.44	2.25	2.19	1.99	1.98	1.37	1.54	1.5	2.16	2.72	2.82	2.65
Mertk	3.2	3.97	3.37	3.41	3.54	2.02	3.06	2.69	3.4	3.04	2.76	2.19	2.08	1.68	1.04	1.4	1.55	2	2	2.63	2.75	1.56	1.73	2.61	1.78	6.1	5.15	5.55	4.86	4.51	4.22	3.9
Met	1.38	1.42	1.36	1.53	1.57	1.93	1.76	2.32	1.05	1.27	1.57	2.9	2.74	4.62	4.91	4.4	2.84	2.81	2.99	3.15	3.24	7.07	6.5	2.87	3.84	1.98	2.58	2.57	3.82	3.03	2.91	3
Mettl8	3.79	2.37	4.19	3.35	3.65	3.18	3.74	3.25	4.7	4.51	3.86	7.21	7.45	6.45	6.81	7.67	7.87	7.7	6.79	6.84	6.29	5.94	6.18	6.14	5.18	6.28	6.36	5.92	6.69	6.12	6.62	6.55
Mex3c	22.85	26.18	24.92	26.51	25.92	26.46	28.89	27.7	22.23	23.94	25.26	16.26	16.96	17.08	17.72	20.11	17.44	18.59	16.39	15.12	15.33	15.4	15.39	15.75	15.92	11.52	11.5	10.97	12.72	13.19	11.72	12.97
Mical1	14.28	14.63	12.82	14.71	14.06	12.05	13.35	12.46	13.96	14.04	14.98	7.31	7.82	6.09	5.92	5.49	7.7	7.2	6.7	7.84	7.09	4.91	6.05	7.69	7.42	7.42	7.58	7.54	6.77	7.36	6.51	7.04
Mir22hg	19.88	23.33	22.55	23.7	23.72	28.67	22.93	25.26	29.01	24.62	24	14.21	13.19	16.68	13.53	14.07	13.63	13.51	14.4	13.18	11.06	14.69	12.01	13.44	12.34	9.98	12.3	10.59	10.08	9.61	10.9	11.82
Mir703	4852.83	5849.11	6689.39	4459.84	5664.82	3753.03	4083.03	4464.36	4038.99	2754.16	6123.02	3885.7	4912.8	2705.01	3171.27	3176	4023.22	4688.55	4657.32	4670.26	6690.87	6453.42	4574.9	3620.68	3531.59	3458.63	3157.38	3002.07	3415.88	3144.47	4072.23	3435.27
Mitd1	11.83	11.22	11.41	11.23	10.98	11.04	11.35	11.08	11.82	11.07	12.28	18.88	19.98	13.32	14.13	14.97	16.09	19.39	15.65	32.65	34.15	15.21	14.48	23.08	24.99	52.75	44.67	45.15	18.78	37.26	37.5	31.65
Mlkl	11.81	12.52	10.69	11.28	9.99	10.62	10.76	10.95	10.67	12.21	12.42	11.77	12.21	9.97	10.19	9.33	9.86	11.34	9.76	17.83	19.13	9.66	11	14.35	14.19	32.01	33.57	30.78	11.54	19.2	21.65	17.91
Mllt3	0.71	0.56	0.59	0.62	0.56	0.42	0.42	0.57	0.52	0.61	0.6	1.11	1.19	1.08	1.22	0.94	0.97	0.94	1.06	1.64	1.6	1.06	1.36	1.32	1.37	2.02	2.1	2.09	1.43	1.61	1.49	1.62
Mmp13	8.71	9.94	9.84	9.26	7.84	11.03	13.11	11.1	8.19	8.62	10.77	6.15	7.19	10.13	8.97	9.61	5.7	5.72	6.02	4.95	4.71	5.39	5.74	3.82	4.7	6.3	5.93	5.93	2.5	3.76	4.21	3.67
Mmp14	2.16	3.12	3.17	3.24	3.11	5.25	5.42	5.66	3	2.77	2.62	4.17	3.94	11.02	9.62	11.04	4.1	3.37	3.6	5.11	4.92	16.27	14.78	6.25	6.13	7	6.91	5.13	13.8	9.24	11.21	9.61
Mnda	9.46	12.97	11.13	11.74	12.23	14.54	16.76	15.04	10.32	11.48	11.28	27.95	39.9	17.76	21.24	23.08	20.78	22.88	25.05	84.65	89.48	33.98	19.51	45.06	52.83	186.65	182.74	158.34	22.69	81.34	107.42	78.65
Mndal	14.29	16.99	15.32	16.7	15.83	19.25	19.45	19.76	15.15	14.04	15.96	28.2	35.85	23.07	23.93	28.26	22.82	26.34	27.86	73.11	82.71	33.19	22.64	44.37	50.61	144.39	141.39	129.12	26.56	75.39	92.03	77.33
Mov10	2.65	3.19	2.73	2.61	2.62	2.12	2.33	2.88	2.75	2.73	2.67	3.14	4.87	1.61	1.93	1.72	2.24	3.34	3.56	9.83	10.61	3.61	2.06	6.22	6.4	23.01	24.86	21.69	4.18	11.53	13.25	10.72
Mr1	2.59	2.52	2.74	2.51	2.34	2.26	2.83	2.03	1.99	2.62	2.55	1.33	1.61	1.5	1.52	1.32	1.45	2	2.07	1.77	1.63	0.91	1.25	1.61	1.38	1.78	2.4	2.37	1.66	2.05	1.54	1.36
Mrc1	11.34	16.25	15.46	14.16	15.45	14.06	16.03	14.85	12.94	14.6	15.07	5.75	5.85	4.24	4.99	4.53	5.8	5.71	6.02	3.62	3.77	2.1	2.31	2.89	3.21	5.87	5.55	5.42	4.47	4.19	3.68	4.4
Ms4a4c	0.37	0.94	0.53	0.59	0.43	0.51	0.55	0.71	0.51	0.52	1.02	1.96	2.78	1.15	0.89	1.17	2	2.04	1.92	13	12.46	3.39	1.88	5.07	4.69	57.07	55.92	45.8	4.04	13.06	21.14	11.8
Ms4a6b	5.23	7.6	6.4	7.35	6.83	5.73	7	6.27	6.28	6.46	6.81	7.16	9.3	5.44	6.54	6.31	8.15	7.74	7.55	21.49	20.91	9.05	7.2	13.72	11.87	72.12	71.54	67.03	15.98	30.1	36.46	25.1
Ms4a6c	33.07	44.79	41.37	41.25	38.65	36.14	39.38	40.65	35.22	36.3	36.84	46.1	48.49	43.63	43.84	49.41	45.28	43.08	48.26	91.91	98.4	72.96	56.43	72.88	73.62	238.15	231.75	219.36	83.66	131.83	160.94	117.96
Ms4a6d	45.91	49.67	52.87	48.18	49.57	47.07	50.76	45.84	44.44	46.74	48.13	59.59	66.46	58.53	60.2	63.04	59.43	58.05	61.7	102.79	102.16	82.9	78.97	84.46	91.98	205.69	193.46	181.59	100.9	131.19	146.56	118.96
Ms4a7	61.77	74.98	70.81	73.48	67.11	66	76.17	73.32	62.28	71.06	69.79	89.23	88.67	87.73	92.71	96.4	85.78	89.25	86.36	121.22	120.22	99.91	105.31	118.12	115.19	201.24	198.1	199.94	140.99	168.92	182.03	160.74
Msantd3	11.44	12.75	13.31	13.52	13.47	14.83	14.86	17.32	11.58	12.57	12.71	11.29	10.92	15.04	14.5	13.36	12.36	12.91	9.64	10.71	8.94	12.48	13.71	11.79	13.03	5.88	4.81	5.58	7.24	6.72	7.59	6.55
Mthfd2l	1.38	1.66	1.61	1.4	1.53	1.72	1.31	1.68	1.78	1.44	1.7	1.09	1.27	1.15	1.52	1.16	1.15	1.2	1.08	0.79	1.08	0.96	1.12	1.18	1.15	0.63	0.76	0.53	0.79	0.76	0.96	1.21
Mthfr	5.1	5.7	5.3	5.52	5.45	5.94	5.15	5.65	6.07	5.4	5.63	6.84	8.28	5.11	4.99	5.38	6.19	5.84	5.97	12.53	12.39	6.37	5.9	8.2	7.56	24.73	24.27	22.36	6.66	12.78	14.39	12.2
Mtus1	6.81	6.66	6.59	6.86	6.53	6.13	6.02	5.94	6.84	6.57	7.09	3.73	3.97	3.07	2.81	3.51	3.94	4.1	3.78	4.55	4.51	2.64	3.41	3.95	4.25	7.13	6.73	7.33	4.84	5.62	6.28	5.74
Mvk	15.22	14.47	14.49	14.5	13.32	11.44	13.32	14.81	14.74	13.62	13.5	10.73	11.15	9.01	10.91	8.61	10.84	10.53	10.55	8.26	8.71	7.34	6.37	8.03	8.05	9.31	10.62	10.22	9.23	10.33	9.22	8.03
Mx1	0.83	1.84	0.69	0.86	0.9	1.38	1.13	1.17	0.94	0.98	1.13	7.82	10.79	1.77	2.07	1.91	3.2	4.59	5.83	22.09	20.84	3.51	1.97	7.84	7.11	47.53	48.63	47.13	2.72	16.17	23.59	14.99
Mx2	0.21	0.59	0.36	0.44	0.62	0.89	0.79	0.61	0.43	0.3	0.37	4.27	6.41	1.19	1.18	1.46	2.44	2.69	4.2	10.72	11.35	2.58	1.47	4.67	4.24	18.33	18.87	18.01	1.68	8.58	10.37	9.13
Mxd1	1.22	1.36	1.61	1.54	1.44	1.63	1.69	1.65	2.03	1.98	1.6	1.8	2.22	1.74	1.6	1.36	1.81	1.73	2	3.28	2.41	1.35	1.41	1.57	1.57	2.94	3.24	2.96	1.75	1.99	2.72	1.99
Myc	41.44	43.68	44.49	46.69	46.94	46.53	45.03	48.95	45.48	43.68	39.65	50.31	44.83	57.38	59.34	49.42	41.26	41.5	50.07	34.04	33.63	43.1	44.43	35.81	34.42	15.63	15.99	16.39	24.97	22.04	20.61	21.92
Mycl1	2.07	2.07	2.25	2.5	2.52	4.17	4.47	4.58	2.07	2.02	1.95	3.24	2.89	7.65	8.26	7.91	4.03	3.22	4.05	1.82	1.91	4.93	4.52	2.83	3.07	0.88	1.21	1	1.88	2.88	2.18	2.07
Nab2	34.07	31.8	31.5	32.39	29.97	29.7	30.3	29.92	40.3	37.84	35.64	19.33	19.37	18.87	19.75	19.45	20.69	19.15	19.22	18.2	17.72	21.36	17.75	16.28	16.28	16.77	15.97	15.44	17.69	17.72	16.04	14.49
Nadk	76.88	78.21	81.67	84.51	80.69	84.12	86.03	91.61	78.96	81.65	82.49	122.82	123.83	147.71	148.05	153.3	125.44	126.38	124.81	126.09	131.93	178.45	168.55	143.49	146.89	123.06	124.99	123.56	158.95	155.96	157.39	146.22
Nampt	24.67	26.35	24.18	22.8	24.81	24.47	25	24.34	22.07	24.58	24.64	31.27	35.78	28.25	29.09	32.55	30.47	31.82	31.48	53.64	57.98	38.7	34.15	42.68	48.3	78.89	77.98	73.59	36.6	57.27	63.85	57.83
Nanos1	24.7	21.84	20.31	19.52	19.37	15.48	17.24	15.67	19.41	21.07	20.8	6.93	7.11	4.55	4.82	4.51	8.32	7.01	7.76	7.53	7.22	3.79	4.56	6.82	5.92	8.42	7.07	7.44	5.55	5.26	4.73	5.57
Nap1l2	1.52	1	0.81	0.9	1.15	1.51	1.09	0.9	0.68	0.81	0.87	1.22	1.55	1.17	1.6	1.52	1.4	1.43	1.91	1.98	1.56	0.87	1.2	1.83	1.97	2.78	2.57	2.39	0.94	1.71	2	1.75
Nceh1	118.07	111.28	109.28	106.47	106.52	99.06	105.16	101.29	103.36	109.36	108.29	68.15	71.71	55.11	57.87	55.89	70.31	72.22	67.18	84.77	84.41	62.23	60.44	75.77	75.8	106.97	104.17	101.46	81.08	87.81	87.52	86.42
Nck2	12.41	12.04	11.84	11.3	11.63	9.61	11.34	10.98	10.38	10.33	9.21	7.38	7.39	6.04	5.97	5.91	6.65	7.15	6.21	9.21	9.13	7.22	8.24	7.03	7.1	7.53	7.44	7.7	7.96	7.01	7.27	8.3
Nckap1	1.91	2.05	1.88	1.82	2.03	1.71	2.07	1.98	1.67	1.72	2.22	1.46	1.59	1.55	1.53	1.62	1.5	1.35	1.33	1.3	1.38	1.15	1.46	0.96	0.92	1.26	1.05	0.76	1.11	0.81	0.84	1.39
Ncs1	2.92	2.84	2.7	2.56	2.71	2.47	2.53	2.59	3.04	3.05	3.28	3.31	3.44	3.76	3.9	3.35	3.42	2.82	3	2.49	2.29	3.01	3.14	2.35	2.84	1.23	1.3	1.45	2.35	2.01	1.86	2.14
Nedd9	3.54	4.28	3.72	3.5	3.37	3.07	2.61	2.89	4.12	3.63	3.68	2.11	1.84	1.49	1.36	1.42	1.89	1.6	1.73	2.27	2.12	1.86	1.55	2.11	1.77	1.96	1.92	2.04	2.09	1.68	1.82	1.86
Neil1	1.67	2	2.72	2.16	1.59	2.62	1.73	2.32	2.07	2.16	1.88	4.33	4.94	3.73	4.27	3.95	3.78	4.29	5.17	3.02	3.68	3.09	3.38	4.04	4.03	5.13	3.72	3.77	4.25	3.74	4.15	5.16
Nek6	30.33	27.8	28.08	27.5	28.31	24.64	24.85	23.07	29.73	28.36	28.81	17.07	16.03	13.28	12.75	11.87	16.9	15.98	14.91	15.77	14.35	10.15	12.17	12.48	14.08	12.06	11.68	12.44	12.55	11.68	10.18	11.31
Nes	21.9	18.6	19	20.18	19.52	17.79	18.12	18.06	22.52	20.11	22.42	14.33	14.56	13.6	13.18	12.12	13.63	14.11	13.8	9.98	9.81	7.08	6.92	9.76	10.62	5.98	6.04	5.93	3.37	4.27	4.37	5.21
Nfkbiz	5.52	6.62	6.93	8.66	9.17	16.09	13.2	13.73	9.82	9.22	9.63	6.57	6.92	12.74	12.86	13.84	8.13	8.6	8.37	5.92	5.74	11.15	9.18	7.61	8.78	6.32	6.09	6.26	8.18	8.4	8.2	8.14
Niacr1	1.01	1.9	2.31	1.28	1.52	2.52	2.68	2.29	1.61	1.52	1.83	1.91	1.76	4.41	4.08	4.29	2.49	2.39	2.84	1.34	1.47	2.99	2.92	2.23	2.66	0.99	0.97	1.12	1.05	1.46	1.58	1.33
Nid2	4.38	4.25	4.29	4.44	4.57	4.4	4.45	4.31	4.55	4.23	4.27	3.22	3.08	2.92	2.37	2.36	3.09	3.24	2.99	2.77	2.75	1.57	2.46	2.83	2.77	2.67	2.7	2.15	2.88	2.38	2.33	2.51
Nlrc3	2.25	2.28	1.61	2.53	2.02	2.33	1.97	2.45	2.42	2.09	2.2	4.2	4.13	3.83	3.5	3.48	4.4	3.93	3.94	3.74	3.7	4.32	3.83	3.82	3.37	3.24	2.98	3.73	3.68	3.57	3.69	3.91
Nlrc5	2.92	3.23	3.34	3.38	3.06	3.5	3.38	2.9	3.16	3.02	3.05	4.47	5.54	3.16	2.91	3.27	3.58	3.46	4.61	11.1	11.39	4.03	3.38	7.63	7.3	20.38	19.33	17.61	4.64	11.24	12.61	11.28
Nlrp1a	3.09	2.46	2.66	2.99	2.55	2.99	2.37	2.38	2.59	2.53	3.26	4.9	4.79	4.88	4.53	4.65	4.76	4.4	4.98	5.24	5.17	5.85	5.08	5.12	5.19	4.63	5.76	5.38	5.52	5.33	5.53	5.91
Nmi	11.78	11.3	13.06	10.9	11.74	11.04	11.9	11.09	10.87	11.27	11.35	11.61	14.65	11.41	10.58	12.97	10.12	11.88	12.99	24.83	26.76	16.87	12.37	19.81	21.85	42.58	41.52	37.83	14.55	26.72	31.42	26.74
Nod1	1.01	1.1	1.06	0.99	1.16	1.09	1.27	1.13	1.13	0.92	0.88	1.49	1.62	1.24	1.12	1.31	1.32	1.36	1.48	2.5	2.45	1.42	1.79	1.85	1.86	4.47	4.77	4.24	2.04	2.67	4.06	2.83
Nox1	0.59	1.28	0.28	1.21	0.87	0.97	1.09	0.99	0.59	0.86	0.7	1.1	1.42	2.23	2.06	2.04	1.23	1.21	1.54	1.53	1.54	2.8	2.75	1.37	2.64	1.46	2.18	2.29	2.09	2.58	2.53	2.35
Nptx1	31.82	26.07	26.44	26.39	27.48	24.12	25.21	25.02	26.71	28.44	28.86	59.55	57.28	54.91	55.94	50.66	57.72	58.76	55.64	55.98	56.46	51.12	53.67	47.09	49.19	40.62	40.54	40.22	36.74	35.74	34.01	34.87
Npy	97.5	93.19	92.6	89.52	97.68	80.24	92.08	97.02	95.19	92.14	91.5	128.16	136.16	135.65	143.86	138.12	122.33	115.39	126.74	166.33	171.57	151.68	172.05	141.51	146.74	194.36	190.68	180.52	164.98	184.45	187.85	159.83
Nr1h3	7.49	9.95	10.19	10.45	9	9.51	11.49	12.38	10.87	10.84	11	12.63	13.35	16.64	15.7	17.21	12.58	10.24	14.27	19.43	20.21	31.3	27.52	21.2	22.61	26.71	29.83	27.19	38.76	34.13	35.01	29.7
Nrp1	100.07	86.52	89.94	88.81	86.48	80.03	82.09	79.68	88.74	91.13	91.24	57.36	58.25	44.24	43.95	43.4	55.38	58.16	53.39	58.99	61.46	35.03	39.61	46.69	47.67	61.67	61.9	59.53	37.03	45.24	43.29	47.09
Nt5c3	17.07	16.69	15.59	15.3	15.76	15.86	17.72	16.03	13.46	18.96	17.31	23.98	25.89	17.9	20.81	18.98	20.94	21.83	20.47	38.85	36.71	21.81	18.45	24.23	27.73	66.96	65.83	56.74	17.7	31.97	42.46	31.59
Nt5e	0.9	0.69	0.55	0.79	0.74	0.6	0.62	0.73	0.64	0.64	0.76	1.83	1.48	2.16	1.65	1.77	1.57	1.96	1.88	1.1	1.29	1.55	1.34	1.35	1.36	0.55	0.36	0.54	0.6	0.62	0.51	0.58
Nthl1	2.89	1.59	2.19	2.21	2.05	2.11	2.56	2.42	2.49	2.42	2.22	5.29	4.78	4.1	4.85	5.26	4.82	6.37	4.24	4.55	4.81	3.26	4.9	5.08	4.72	4.6	4.53	4.88	4.77	5.02	5.5	4.87
Nuak1	2.79	3.21	3.58	3.01	3.21	2.81	3.52	3.39	3.2	2.91	3.04	1.51	1.57	1.56	1.63	1.71	1.72	1.54	1.86	1.43	1.6	1.52	1.67	1.58	1.81	1.9	1.78	2.08	2.43	2.59	2.1	1.86
Numbl	3.46	2.82	3.63	3.06	2.64	2.84	2.76	2.42	3.19	3.07	2.74	1.99	1.64	1.63	1.52	1.27	1.46	2.15	2.03	1.96	1.8	1.03	1.41	1.82	1.77	1.93	1.88	1.92	2.04	1.72	2.06	1.66
Nxpe5	1.28	1.81	1.71	1.89	1.62	0.99	1.51	1.21	1.24	1.79	1.18	0.4	0.7	0.5	0.41	0.32	0.75	0.56	0.87	0.5	0.59	0.12	0.41	0.34	0.73	1.37	1.53	1.29	1.72	1.1	1.57	0.89
Oas1a	20.07	27.8	22.08	23.67	21.11	22.03	23.4	22.07	23.75	21.69	24.33	29.5	38.87	19.55	23.74	23.16	22.8	28.77	27.52	84.75	89.45	41.75	29.07	60.01	62.3	177.9	172.43	164.74	48.66	109.74	125.42	106.48
Oas1b	0.97	1.63	1.29	1.58	1.26	1.54	1.21	1.28	1.53	0.92	1.59	2.97	3.77	1.34	1.35	1.51	1.76	2.41	2.57	6.5	7.22	3.36	1.43	4.53	3.94	11.77	11.02	10.56	2.44	7.31	7.92	7.59
Oas1c	2.16	1.81	2.07	1.9	1.9	1.52	2.27	1.77	1.93	1.51	1.64	2.09	2.3	1.11	1.57	1.66	1.51	2.25	2.16	3.24	3.77	1.44	1.87	2.83	2.9	6.26	5.53	6	2.86	4.05	4.95	4.79
Oas1g	7.59	11.06	8.19	9.2	8.84	8.79	9.81	9.87	8.65	9.16	9.54	11.71	14.98	7.74	9.93	10.23	9.42	11.08	11.74	36.03	37.77	15.97	11.58	25.26	26.29	80.21	79.61	77.82	20.14	47.93	53.55	45.51
Oas2	3.19	4.36	3.71	3.85	4.22	5.34	3.64	3.82	5.37	5.12	4.64	9.32	12.36	5.7	6.24	6.02	5.7	6.48	9.82	24.06	23.67	14.62	7.09	18.86	17.3	36.74	36.15	38.14	11.25	27.35	27.46	31.7
Oas3	10.72	12.85	10.64	10.99	10.6	10.43	11.14	11.1	10.72	10.37	11.65	17.88	25.33	9.25	11.9	10.96	11.76	15.61	18.36	65.24	71.27	21.48	15.7	37.88	41.94	131.92	136.62	128.42	26.86	74.88	85.51	73.36
Oasl1	0.56	0.52	0.48	0.47	0.38	0.49	0.51	0.47	0.31	0.52	0.34	3.33	4.66	0.54	1.11	0.77	1.57	1.88	2.74	15.78	13.04	2.04	1.22	4.64	4.54	38.36	40.79	34.66	2.11	10.96	18.09	10.46
Oasl2	6.37	7.99	6.54	6.73	7.01	7.36	6.67	6.8	7.41	5.8	8.08	18.43	28.39	8.84	10.62	11.64	12.22	17.33	18.18	79.54	91.6	25.11	14.44	43.78	49.87	193.23	189.2	186.12	29.69	113.2	126.01	103.11
Ocstamp	1.07	0.66	0.86	1.13	1.18	1.28	1.15	1.38	0.84	0.74	1.12	1.47	1.39	2.08	1.54	2.03	1.86	2.01	1.99	1.97	1.78	2.38	2.49	1.65	1.56	1.06	1.82	1.64	2.28	2.24	1.66	1.52
Odf2	34.47	34.47	33.63	35.32	34.48	33.68	36.05	33.23	34.84	33.9	34.99	23.75	22.94	23.77	22.89	22.03	22.11	21.51	20.66	17.8	17.07	17.41	18.53	18.14	18.58	14.74	15.31	15.47	18.55	16.05	16.51	18.7
Ogfr	29.58	30.74	33.02	31.51	31.97	28.83	30.59	31.54	33.88	32.05	29.38	43.34	46.51	34.22	36.88	33.97	34.46	35.78	42.76	65.87	71.23	33.96	33.93	47.56	47.08	91.39	90.91	88.68	37.73	65.3	66.79	58.14
Oit3	2.4	2.38	2.54	2.69	2.52	2.91	2.39	3.08	2.53	2.52	2.92	3.42	3.57	3.72	3.85	4.44	3.97	3.42	2.89	3.62	3.62	5.51	4.9	3.56	3.66	2.92	3	3	4.47	4.01	3.83	3.46
Olr1	3.22	4.08	4.33	4.41	4.3	8.99	8.42	8.28	6.01	5.95	5.98	2.36	2.24	3.87	4.2	4.34	1.77	2.54	1.95	1	1.05	2.88	1.82	1.2	1.77	0.35	0.47	0.48	0.69	0.76	0.65	0.73
Ophn1	5.65	5.79	6.1	6.12	5.72	5.61	5.96	5.51	5.73	5.79	5.63	5.87	5.78	4.12	4.65	4.78	6.48	5.93	5.68	5.25	4.76	2.46	3.34	4.66	4.35	6.25	5.9	5.6	5.13	4.88	4.24	4.43
Optn	7.11	7.54	7.46	7.16	7.2	7.81	8.43	7.72	7.39	6.44	7.19	3.69	3.31	3.19	3.28	3.9	4	3.44	3.78	3.54	3.81	3.07	3.13	4.58	4.3	4.8	4.18	4.69	3.41	3.43	4.15	4.2
P2rx4	29.08	33.63	31.6	31.69	31.71	30.65	33.46	32.62	30.46	31.65	31.06	32.01	31.22	30.96	33.21	32.97	32.57	33.59	31.22	41.88	40.41	34.57	36.88	35.97	37.91	61.18	62.72	61.27	47.78	56.83	56.99	49.94
P2ry12	2.94	3.92	4.06	3.82	3.89	3.02	3.48	3.64	3.18	3.47	3.28	1.25	1.59	0.7	0.99	1.22	1.73	1.57	1.33	1.39	1.82	1.1	0.94	1.36	1.52	4	3.92	3.66	1.53	2.03	1.92	1.61
P2ry14	1.06	0.96	0.83	1.15	0.91	0.88	1.08	0.86	0.6	0.74	0.91	0.45	0.77	0.53	0.22	0.66	0.49	0.68	0.62	1.87	2.24	1.07	0.41	0.98	1.08	6.37	5.75	5.81	1.74	2.88	4.04	2.76
P4ha1	36.54	35.1	36.61	34.99	34.17	34.08	35.78	35.13	34.6	37.09	37.57	74.51	76.36	76.05	76.3	75.26	74.5	77.22	75.34	71	74.4	72.03	73.13	69.77	73.26	61.76	58.38	58.01	51.77	57.86	61.05	59.18
Pald1	34.62	36.1	38.57	34.51	35.77	29.93	32.67	31.8	38.67	38.87	36.81	19.62	20.09	15.41	15.67	14.44	19.17	19	19.18	22.64	21.48	15.82	15.17	20.9	17.46	24.27	24.87	23.66	22.26	20.31	20.51	20.4
Palld	2.57	2.97	2.48	2.55	2.46	2.26	2.69	2.43	3.25	2.79	2.83	1.16	1.07	0.99	1.1	1.09	1.37	1.24	1.26	1.3	1.08	1.32	1.24	1.12	1.37	1.16	1.03	0.96	1.3	1.01	1.06	1.07
Parp10	6.33	6.7	6.16	7.25	6.41	6.96	6.68	6.94	7.59	6.7	6.83	10.03	13.98	6.65	6.98	7.5	8	9.43	9.88	24.19	23.76	9.68	8.1	13.92	12.97	39.71	37.83	34.34	9.92	21.3	24.75	20.89
Parp11	2.87	3.71	2.88	2.92	3.23	2.69	3.1	3.14	3.55	2.79	3.54	4.69	5.57	4.1	3.76	3.61	4.3	4.27	4.6	10.42	11.47	7.06	4.71	7.45	7.07	23.71	22.7	19.42	5.23	10.28	13.06	10.62
Parp12	14.95	15.19	14.72	14.53	14.57	13.66	13.79	14.11	15.42	14.68	15.32	21.95	31.53	15.66	17.06	17.2	17.89	19.53	23	57.97	63.79	24.29	18.87	37.15	39.89	104.79	103.18	93.86	25.28	59.48	71.16	59.89
Parp14	13.71	16.9	14.65	15.69	17.02	18.32	17.28	18.08	15.26	14.48	14.79	34.16	42.97	19.97	21.47	23.46	23.6	27.69	33.56	74.84	76.78	34.25	22.95	48.98	52.81	115.2	109.31	106.43	28.97	72.43	80.55	74.09
Parp3	8.42	9.02	9.92	9.63	8.86	11.24	10.43	10.74	9.89	9.88	10.88	10.67	12.19	12.14	12.47	12.08	11.49	11.46	10.66	14.03	15.14	11.03	10.89	13.32	12.87	20.94	21.5	19.01	11.08	16.33	17.61	14.75
Parp8	5.29	5.76	6.24	6.1	6.31	6.34	6.69	6.54	5.18	5.42	4.86	8.37	9.72	9.67	8.64	8.94	8	7.54	8.38	12.22	12.2	10.43	10.31	11.33	11.35	12.79	14.08	13.16	10.11	12.43	13.88	12.9
Parp9	11.12	13.36	12.32	11.86	12.15	12.78	12.87	13.15	12.18	12.56	12.85	21.11	27.42	14.07	14.71	15.08	16.79	17.85	21.8	45.15	47.21	20.21	15.59	31.57	32.29	73.39	71.18	67.12	22.16	47.26	54.87	47.17
Pcyt1a	30.19	29.13	29.07	29.16	28.67	26.96	29.13	28.36	25.81	27.24	25.35	17.29	16.75	14.42	15.07	15.21	17.93	17.88	15.68	18.02	17.27	14.8	14.76	15.72	16.19	23.46	23.63	22.76	18.74	20.16	21.23	19.37
Pdcd4	3.52	3.97	2.99	3.87	3.36	3.33	2.92	3.2	3.67	3.64	3.78	4.35	4.09	3.65	3.45	4.67	5.17	5.29	5.02	5	5.47	4.38	5.06	4.79	4.61	7.62	7.76	6.98	7.12	6.54	8.18	6.37
Pde2a	3.92	4.38	4.06	4.34	4.31	5.48	4.94	4.83	4.24	4.22	4.36	10.86	10.44	15.42	15.34	16.65	10.56	10.85	11.25	15.02	15.86	29.26	26.72	15.68	17.67	14.65	14.52	15.5	27.65	20.9	20.23	19.79
Pde3b	8.5	7.9	7.97	8.31	8.09	6.8	7.21	7.01	7.52	8.23	7.98	6.59	6.33	6.17	5.47	6.53	6.97	6.97	6.4	5.68	5.09	3.81	4.25	5.19	4.66	5.28	4.42	4.84	4.27	4.25	5.1	5.11
Pde4b	4.18	5.86	5.32	6.74	7.18	11.19	12.1	11.7	6.64	5.79	6.44	5.82	5.56	10.29	10.34	11.4	6.44	5.67	6.96	4.09	4.74	8.14	7.62	6.44	6.75	3.13	2.89	3.18	4.71	5.52	5.93	5.27
Pde7b	0.69	0.81	0.77	0.68	0.65	0.52	0.68	0.6	0.47	0.79	0.57	0.45	0.75	0.38	0.36	0.37	0.58	0.55	0.42	1.86	2.5	0.4	0.43	1	1.21	6.6	6.46	5.75	0.85	2.44	2.98	2.13
Pdgfa	52.71	52.45	51.51	54.01	57.56	56.75	59.09	54.21	55.32	54.02	53.02	25.78	25.62	22.29	24.81	19.95	27.4	25.98	23.52	21.4	21.02	15.6	15.89	20.1	19.75	16.21	15.1	16.19	13.01	15.9	14.15	13.09
Pdgfb	140.96	149.69	152.75	172.07	172.73	186.12	187.42	200.97	163.44	161.31	150.65	123.23	122.82	152.86	154.93	147.22	121.43	116.01	127.58	84.7	84.53	87.32	91.5	91.24	91.15	48.33	44.93	45.6	44.26	53.45	49.47	47.06
Pdia5	2.3	1.24	1.25	1.65	2.13	1.53	1.45	1.53	1.83	1.56	1.3	3.55	3.49	4.25	3.59	4.15	2.91	4.06	3.08	4.3	3.92	3.9	3.8	3.95	3	2.99	3.04	3.26	3.22	2.78	3.13	3.67
Pdlim4	16.07	13.81	12.64	15.74	13.86	11.56	12.76	12.99	14.86	15.31	12.63	7.92	8.08	6.56	8.28	6.35	7.36	7.21	8.24	9.7	8.73	5.82	8.16	8.03	7.04	8.21	8.19	7	10.17	9.86	8.89	7.34
Pdxp	1.46	1.66	1.59	1.31	1.61	1.57	1.26	1.25	1.52	1.6	1.74	3.95	3.24	4.2	4.74	3.3	3.95	3.47	3.62	2.61	2.23	2.47	3.17	2.32	2.26	1.07	1.14	1.45	2.22	2.1	1.18	1.62
Peli2	2.02	2.23	2.35	2.41	2.26	2.31	2.12	2	2.36	2.58	2.16	1.31	1.39	1.14	1.06	1.07	1.3	1.35	1.75	1.22	1.12	0.79	1.12	1.06	0.93	1.36	1.39	1.51	1.41	1.44	1.42	1.25
Pet112	3.97	3.63	4.99	4.33	4.12	4.16	3.68	4.22	4.03	3.48	4.04	7.19	7.57	7.54	7.4	7.51	8.44	8.52	6.84	7.49	8.18	8.88	8.05	7.81	7.92	6.68	7.71	7.72	8.1	7.85	7.97	6.75
Pex6	5.28	4.77	5.48	5.45	5.49	4.58	4.14	4.09	5.53	4.79	5.24	10.59	10.95	9.58	10.88	9.73	9.3	9.01	11.44	9.33	10.74	9.86	9.57	9.32	8.49	9.67	9.32	8.92	9.98	9.85	9.22	7.79
Pfkl	25.17	25.14	25.2	25.29	25.06	24.49	23.92	27.89	25.43	24.22	24.55	70.04	72.19	80.48	80.95	79.47	71.09	74.88	69.55	67.65	68.53	78.3	78.39	69.91	68.02	45.42	45.85	47.97	55.1	56.45	51.97	53.45
Pgap1	3.2	3.43	3.09	3.05	3.19	3.19	3.3	3.44	2.82	3.42	3.47	1.67	1.62	1.76	1.59	1.76	1.84	1.87	1.99	2.06	1.9	2.15	2.13	1.9	2.04	2.36	2.03	2.28	2.52	2.38	2.24	2.1
Pgap2	19.99	22.51	20.82	21.13	21.35	18.15	21.15	19.71	17.28	20.48	21	22.27	21.56	22.33	22.69	22.34	21.35	21.04	22.57	29.16	28.56	29.64	24.51	23.11	23.11	42.62	39.87	38.86	29.37	33.89	32.34	30.25
Phf11a	1.24	1.82	1.5	1.57	1.11	1.32	1.42	1.25	1.19	1.2	1.56	2.01	3.51	1.59	1.24	1.4	1.9	1.98	2.24	9.6	9.07	3.07	1.69	3.78	5.08	27.54	25.39	22.36	2.46	8.88	13.36	7.96
Phf11b	2.84	3.75	2.54	3.7	3.4	3.2	3.94	3.34	3.21	2.9	3.57	5.4	8.38	3.06	3.19	3.27	4.16	4.82	4.08	21.63	23.29	6.06	4.28	10.82	13.12	67.65	66.97	58.02	6.83	23.85	33.91	24.42
Phf11c	1.6	1.66	1.64	1.41	1.12	1.68	1.31	1.34	1.82	1.13	1.66	2.31	2.81	1.85	1.51	1.55	2.01	1.73	1.84	5.88	6.59	2.92	1.48	3.65	3.45	14.08	14.89	13.17	2.31	6.61	8.41	6.86
Phf11d	2.23	2.62	2.4	2.28	2.03	1.81	2.56	2.33	1.86	2.08	2.52	3.74	4.88	1.68	2.31	2.34	2.49	3.08	3.47	11.58	14.08	3.82	2.66	6.67	7.71	34.48	34.06	29.23	4.07	14.12	17.84	13.61
Phlda1	4.23	4.45	5.47	5.23	4.86	4.78	5.2	5.73	4.63	5.08	4.14	3.53	3.2	4.54	4.51	3.94	3.39	2.9	3.45	3.32	2.69	3.43	2.99	2.3	2.87	1.1	1.01	1.15	1.79	1.32	1.39	1.62
Phldb1	14.7	16.77	18.6	18.94	17.97	23.12	22.7	24.53	19.97	17.15	16.75	8.34	8.17	9.85	10.18	9.25	7.99	8.61	9.76	7.41	7.52	7.42	9.08	8.8	8.01	5.18	5.72	5.87	6.95	6.77	6.73	6.71
Pid1	152.36	143.89	152.15	153.93	147.46	149.38	154.46	158.4	146.95	158.39	167.68	304.84	303.29	319.61	323.79	344.79	313.48	313.89	304.1	285.39	290.81	330.88	321.7	281.34	303.32	273.61	274.47	268.89	319.36	305.66	306.96	294.87
Pilra	2.72	3.35	3.06	2.36	3.03	3.11	2.89	2.79	3.41	3.12	3.46	3.46	3.62	4.72	4.72	5.04	3.51	3.45	2.65	4.5	4.22	9.61	8.09	4.64	5.57	4.01	4.02	3.73	10.33	6.21	5.89	6.09
Pion	12.12	14.38	15.02	16.02	13.54	21.24	19.17	18.99	15.53	16.09	15.6	24.77	25.09	31.69	31.46	31.92	25.86	26.61	27.2	24.43	25.29	38.76	31.86	28.66	29.45	21.19	21.23	20.05	24.52	26.91	27.95	25.7
Pir	4.96	4.31	3.84	3.78	3.59	3.91	4.81	4.03	3.94	3.78	3.87	2.63	3.17	2.95	2.8	3.01	3.88	2.94	3.53	3	3.09	3.73	3.21	3.47	3.47	1.69	1.94	2.48	3.3	3.19	2.86	3.09
Pira11	5.89	7.65	5.66	9.56	7.15	8.26	7.7	9.21	6.68	5.4	6.89	6.34	8.51	7.03	7	11.66	7.25	12.1	9.81	11.05	7.22	22.67	11.23	11.4	9.07	14.28	15.87	14.59	17.27	18.83	10.56	15.36
Pira7	3.54	4.77	3.28	3.42	4.14	3.83	4.94	4.72	3.95	3.82	3.74	3.82	5.28	4.87	3.55	5.13	3.5	5.05	4.78	6.17	5.63	9.12	6.46	6.7	5.98	9.49	8.59	7.7	7.64	9.13	8.27	8.75
Pitpnc1	6.56	6.49	6.89	7.34	6.98	6.4	6.44	5.97	6.84	6.2	6.55	3.86	3.83	3.59	3.27	2.95	3.52	4.18	3.68	4.21	4.16	3.75	4.07	3.98	3.28	4.26	4.14	4.25	4.62	4.63	3.96	4.15
Pkib	4.39	4.47	4.42	3.95	4.28	3.93	4.05	3.97	4.61	4.77	4.82	2.52	2.55	1.61	2.2	1.81	2.51	2.7	2.58	2.32	2.18	1.56	1.6	2.16	1.67	2.65	2.45	2.34	1.8	1.52	2.13	1.86
Plau	841.64	808.5	779.93	764.64	814.53	687.25	781.25	735.89	713.06	740.21	767.11	572.79	571.99	466.48	499.01	482.11	590.56	574.32	525.4	411.41	394.44	279.79	281.65	378.03	385.97	215.93	202.43	199.19	137.1	158.31	155.12	180.4
Plaur	131.75	134.99	150.76	145.9	145.12	144.44	142.92	163.45	143.62	145	131.6	140.63	136.25	159.94	155.84	139.58	121.81	121.82	130.72	107.47	106.57	115.25	124.58	106.38	99.55	45.1	45.31	44.87	54.52	60.73	53.98	55.16
Plcb2	3.41	2.8	3.62	3.91	3.71	4.45	3.21	3.69	4.57	3.73	3.58	6.08	5.74	6.29	5.66	4.8	6.05	5.96	6.63	6.5	6.87	8.08	7.31	7.47	7.16	7.43	7.25	7.18	7.88	7.82	7.23	7.8
Plekhh2	2.5	1.9	2.34	2.59	2.67	2.2	2.32	2.01	2.29	2.18	2.31	1.9	2.05	1.55	1.64	1.71	2.1	2.2	1.85	1.47	1.39	1.84	1.31	1.38	1.47	1.07	0.92	1.19	1.09	0.93	0.89	0.8
Plekhm1	17.65	16.93	17.38	16.39	15.73	14.5	13.95	14.43	17.74	16.05	17.26	19.96	21.36	17.14	16.34	16.87	20.81	23.72	20.9	27.6	28.83	22.07	21.89	24.51	23.96	35.51	36.28	35.05	28.65	30.8	29.71	29.64
Plekhn1	3.25	3.59	3.85	4.45	3.7	4.94	2.95	3.82	4.3	3.94	4.2	5.41	5.01	4.1	4.71	4.7	4.51	5.28	5.12	7.48	7.69	8.2	5.36	5.85	6.82	11.6	11.98	10.46	6.23	10.05	9.18	9.16
Plk2	36.41	27.74	26.4	31.87	29.75	30.26	29.98	30.17	32.57	32.85	30.61	22.16	22.98	20.8	19.18	18.86	21.5	22.53	20.82	20.9	20.69	18.52	16.39	16.14	19.05	16.07	14.63	14.7	8.94	12.33	11.75	11.68
Plk3	10.4	10.62	10.8	10.78	9.83	9	9.28	9.8	12.32	10.63	11.12	5.69	5.29	5.01	5.09	4.55	5.11	5.02	5.09	5.45	4.52	5.8	5	4.02	4.33	3.46	3.48	3.51	3.93	3.22	2.69	3.94
Plxdc2	15.34	17.75	17.68	15.42	15.91	15.29	17.27	16.37	14.56	15.31	15.23	6.05	6.2	5.98	5.31	5.68	7.91	8.3	6.37	5.28	5.33	3.05	3.34	5.33	5.45	6.92	5.82	5.9	2.55	3.75	5.21	4.25
Plxnc1	11.12	11.73	11.42	11.23	11.58	11.02	10.32	10.68	11.52	11.58	12.03	7.12	6.61	6.09	5.79	5.87	7.02	7.13	6.46	6.92	6.46	3.64	4.94	6.62	6.29	7.97	7.59	7.92	5.89	6.39	6.31	7.16
Pmepa1	16.65	15.02	17.71	16.45	16.74	12.31	13.87	14.62	16.68	16.57	15.14	11.83	12.01	10.78	11.22	8.87	11.88	11.17	12.32	11.55	11.4	6.41	7.94	9.19	9.01	8.84	8.7	8.64	5.65	6.98	7.62	5.79
Pml	4.42	4.42	4.98	4.11	4.72	3.88	4.02	4.21	4.05	4.56	4.28	6.86	8.29	4.13	4.4	4.19	5.33	5.29	6.35	13.88	14.36	5.89	6.1	8	9.02	22.82	24.33	21.81	8.82	14.15	16.15	13.55
Pnp	53.41	59.69	59.12	56.07	55.93	49.08	53.61	53.35	51.34	52.35	54.17	69.65	83.03	60.75	62.69	66.15	70.23	72.97	69.99	128.27	136.66	80.99	69.02	93.06	99.9	246.62	246.12	228.24	82.44	140.72	173.41	138.35
Pnp2	22.08	24.22	23.44	24.85	22.86	21.01	23.52	22.16	21.34	23.07	23.27	29.66	35.7	24.02	25.3	28.74	29.55	30.79	28.32	54.85	57.5	34.38	28.97	40.82	41.94	103.49	105.89	94.87	35.09	60.14	71.15	58.22
Pnpt1	17.75	17.79	16.79	16.04	16.27	17.25	16.8	16.54	16.41	16.58	15.96	22.92	23.8	21.18	19.29	21.88	22.23	22.67	21.74	28.45	30.82	20.07	20.82	24.28	24.59	38.29	35.28	35.71	20.02	26.13	31.73	27.11
Polr3g	6.29	6.02	5.63	6.16	6.34	5.97	6.81	6.73	6.14	6.03	6.23	7.22	6.62	7.22	7.66	8.17	7.11	7.14	6.27	4.24	4.2	7.78	7.28	5.42	5.46	2.41	2.42	2.49	5.38	3.64	3.57	3.18
Pot1b	3.71	3.19	3.53	3.41	3.33	4.58	3.52	3.95	4.23	3.56	3.81	4.04	4.94	4.71	5.09	5.07	4.97	3.77	4.35	5.01	4.79	7.03	5.7	5.88	5.33	5.67	5.91	6.65	7.11	6.83	7.79	8.65
Ppap2b	1.24	0.73	0.94	0.94	0.77	1.52	1.39	1.58	1	1.24	0.75	1.06	0.97	2.26	2	2.14	1.56	1.26	1.03	0.9	0.99	2.39	2.41	1.2	1.58	0.7	0.53	0.52	0.94	1.18	0.72	0.84
Ppid	11.73	13.39	13.78	14.24	13.33	15.21	14.9	14.41	13.36	13.2	13.56	17.96	17.27	18.86	19.36	17.91	19.78	17.17	18.59	20.74	20.72	28.56	27.76	24.35	25.98	15.96	16.89	17.42	24.22	20.62	20.75	21.18
Ppm1l	0.94	1.06	0.81	0.87	0.88	1.01	1.19	0.88	1.03	1.04	1.07	4.36	4.49	4.96	5.22	5.47	4.36	4.12	4.54	3.19	3.56	6.28	4.88	3.22	3.75	2.25	2.93	2.58	3.68	2.65	2.68	2.54
Ppp1r3b	5.47	6.07	4.3	5.04	5.13	5.04	5.17	4.91	4.84	5.22	5.75	3.43	3.26	2.94	2.8	2.96	3.73	3.34	2.84	3.19	2.89	2.28	2.6	3.46	3.32	3.01	2.32	2.75	2.44	2.56	2.36	2.62
Prdm1	1.92	2.14	2.25	2.71	2.83	4.31	4.64	4.33	2.64	2.84	2.36	3.4	3.21	5.43	4.96	4.83	3.86	4.08	3.95	2.53	2.73	4.19	4.09	3.29	3.83	2.76	2.85	2.71	3.24	3.52	4.07	3.6
Prelid2	3.03	2.33	3.02	3.96	2.23	2.68	2.66	3.01	2.2	2.8	2.83	5.73	6.26	7.14	8.52	7.46	5.51	7.92	5.85	7.01	8.31	5.94	11.4	8.51	9.08	5.1	4.98	5.72	7	8.71	7.07	7.65
Prkdc	1.27	1.43	1.56	1.42	1.49	1.7	1.44	1.37	1.64	1.32	1.61	3.4	3.27	3.57	3.47	3.51	3.37	3.25	3.63	3.18	3.09	3.76	3.5	3.64	3.52	2.79	2.59	2.98	3.22	2.69	2.41	3.55
Procr	7.05	5.52	5.47	6.23	5.04	6.24	6.41	6.89	6.2	6.58	5.91	7.21	6.73	9.66	9.23	9.82	7.5	7.64	7.65	9.23	7.93	16.82	14.92	11.66	12.06	7.05	7.15	8.27	10.58	10.5	6.8	9.14
Prr24	7.83	7.39	8.52	7.25	7.18	5.51	7.59	6.93	7.96	6.54	6.49	4.86	3.86	4.22	4.59	3.81	3.68	4.41	3.96	3.84	3.82	3.35	3.54	4	3.52	3.5	3.06	3.74	4.41	3.65	2.98	4.03
Prr5l	2.95	3.52	3.43	3.68	3.81	4.13	3.71	3.9	3.65	3.68	3.85	1.38	1.91	1.2	1.23	0.99	1.48	1.56	1.8	2.19	2.3	0.4	0.64	1.71	1.61	2.76	2.53	2.07	0.53	1.49	1.39	1.38
Psmb10	37.49	37.87	37.94	39.96	38.82	32.77	37.65	41.41	37.06	36.89	31	42.29	48.55	40.47	43.96	40.32	37.59	40.69	46.51	71.75	75.34	48.28	45.14	55.91	55.54	130.07	132.84	122.07	51.43	80.75	94.79	72.57
Psmb8	97.65	101.49	100.32	94.4	98.02	80.96	97.81	93.23	100.6	94	94.05	100.21	105.71	87.42	89.11	87.81	90.41	97.5	96.79	142.93	148.63	104.03	94.79	112.25	109.67	226.79	235.14	221.92	111.79	153.56	178.57	145.74
Psmb9	21.56	31.02	25.73	25.22	28.03	21.55	28.14	24.58	22.33	27.21	26.37	26.33	27.4	22.98	22.62	22.02	18.58	25.48	28.14	46.26	51.73	27.86	25.03	37.11	37.65	103.88	101.12	92.8	34.72	56.89	69.79	56.91
Psme1	114.34	133.29	115.39	117.54	116.15	107.51	119.13	116.75	111.65	117.04	113.5	109.93	119.89	110.78	110.51	114.92	117.98	116.36	113.71	147.4	147.75	122.3	113.77	126.95	126.46	235.56	229.18	227.06	127.97	179.54	191.37	160.57
Psme2	128.5	135.48	131.09	130.52	128.97	118.41	138.41	137.4	121.37	122.92	135.48	144.99	158.9	157.06	161.97	165.93	146.55	151.17	145.94	215.03	221.88	208.51	180.29	189.75	197.98	312.03	318.26	309.64	209.34	268.18	303.3	266.91
Ptafr	14.99	15.5	16.56	19.21	16.33	21.8	23.67	20.98	15.06	15.01	15.66	14.41	13.54	17.98	17.34	19.56	14.06	16.39	15.68	19.95	21.33	27.11	23.73	20.41	23.21	39.11	37.22	38.7	27.59	33.79	34.45	30.85
Ptar1	2.63	2.89	2.17	2.01	2.51	2.41	2.03	2.26	2.54	2.62	2.81	3.13	2.42	2.84	2.43	1.83	3.01	2.87	2.91	2.06	2.27	2.67	2.53	2.43	2.29	1.03	0.91	1.64	1.91	1.62	1.61	1.85
Ptger2	1.79	1.68	1.77	1.58	1.58	1.49	1.71	1.77	2.35	1.72	1.45	1.03	1.07	0.75	0.72	1.03	1.08	1.06	1.26	0.92	1.02	0.88	0.68	0.86	0.88	0.92	1.22	1.05	1.41	1.31	1.38	1.54
Ptges	1.17	1.35	1.2	1.51	1.63	2.55	1.98	2.83	1.31	1.63	1.22	3.36	3.16	10.58	9.94	11.87	4.05	3.21	4.16	4.21	4	16.07	13.06	5.23	7.02	4.87	4.77	4.19	7.1	6.86	6.7	6.63
Ptgir	7.01	7.33	6.72	7.94	7.6	8.05	7.68	8.75	7.12	6.91	6.46	4.85	5.01	6.8	6.01	5.24	4.99	4.4	5.26	4.31	4.4	5.85	5.91	4.2	4.5	2.82	3.3	3.24	4.21	4.96	3.94	3.93
Ptgs1	17.23	17.66	18.2	18.35	17.2	16.18	17.24	16.25	15.78	17.58	17.98	8.98	8.06	6.92	7.3	7.8	11.6	9.82	10.01	8.59	7.69	4.67	5.79	6.88	7.41	7.4	6.73	6.27	6.83	6.76	6.36	7.54
Ptgs2	5.31	3.97	4.47	5.18	4.64	8.07	7.2	7.92	3.91	4.64	4.96	4.34	4.17	12.06	11.26	12.09	5.95	5.68	5.16	3.9	3.19	8.63	7.88	4.41	6.34	1.24	1.59	1.51	1.69	2.27	1.75	2.33
Ptms	142.84	146.93	160.23	148.8	150.8	133.55	143.74	147.58	157.03	163.44	144.64	121.46	121.68	114.53	112.74	101.1	119.55	117.3	125.46	97.23	96.99	64.43	86.4	98.22	93.41	111.88	113.93	111.06	104.15	113.18	109.87	93.39
Ptplad2	17.47	18.01	19.02	18.16	18.34	16.32	19.68	16.33	15.75	16.44	18.29	11.79	11.4	8.4	9.89	9.49	11.54	11.37	11.47	12.87	12.02	7.62	7.09	11.17	11.27	19.88	18.94	18.98	12.65	14.25	15.23	14.89
Ptpro	11.04	12.03	11.01	11.01	11.1	10.91	12.24	12.72	10.8	11.06	11.43	13.25	14.7	12.92	12.61	13.73	13.39	14.07	13.68	18.13	20.78	17.46	17.03	17.56	17.67	29.23	28.56	27.74	21.13	24.32	26.83	22.68
Pttg1	18.29	19.97	20.07	20.6	21.98	18.72	19.43	20.53	19.73	20.52	20.39	22.95	22.01	17.83	20.38	20.41	22.58	23.85	25.14	32.32	29.99	22.74	20.89	23.05	22.97	43.69	46.01	40.34	21.01	29.08	37.16	29.51
Pvrl4	1.81	2.43	1.85	2.33	2.45	2.07	2.02	1.74	2.22	2.08	2.22	1.31	2.13	0.91	0.82	1.02	1.14	1.46	1.03	3	3.8	1.05	0.84	2.3	1.98	7.6	7.65	6.41	1.88	3.6	4.07	3.61
Pydc3	0.11	0.09	0.15	0.15	0.11	0.16	0.05	0.09	0.2	0.08	0.16	1.03	1.97	0.24	0.36	0.41	0.55	0.72	1.08	6.49	5.18	0.75	0.48	1.8	1.57	18.17	20.64	17.24	0.7	4.9	8.1	4.51
Pydc4	0.06	0.04	0.11	0.01	0.04	0.03	0	0.02	0.07	0	0	0.34	0.8	0.09	0.16	0.12	0.24	0.52	0.33	2.5	2.19	0.27	0.32	0.79	0.84	8.34	8.09	6.73	0.2	2.26	3.22	1.83
Pyhin1	0.65	0.98	0.72	0.71	1.03	1.02	0.76	0.8	0.88	0.9	0.75	5.98	10.04	1.78	2.22	2.7	3.77	4.39	5.82	27.16	29.89	5.92	2.67	11.29	12.7	93.89	89.53	83.18	5.16	28.47	40.52	27.2
Rab11fip5	17.67	17.43	17.23	16.13	16.22	14.49	15.17	14.4	16.99	17.32	16.19	11.31	11.2	9.29	8.71	8.3	10.8	10.35	9.94	13.45	13.43	10.29	10.67	11.31	10.94	17.2	17.73	16.64	17.73	15.92	16.34	14.68
Rab19	1.78	1.4	1.8	1.55	1.98	1.79	1.44	1.23	2.55	2.04	2.09	0.79	0.85	0.29	0.53	0.4	0.74	1.13	0.73	1.71	1.63	0.7	1.26	1.38	1.58	2.55	2.61	2.26	1.14	1.92	1.96	2.92
Rab20	8.06	11.08	9.72	14.08	14.79	18.01	18.37	16.65	10.21	10.83	10.08	8.17	8.07	12.26	11.12	11.16	11.7	7.43	11.75	8.09	9.08	17.39	13.67	10.51	10.77	6.19	7.23	10.77	8.74	9.74	10.34	10.05
Rab3il1	68.09	69.51	70.44	62.08	65.99	50.11	54.45	50.29	63	67.91	62.42	33.07	31.71	22.42	22.81	20.38	31.33	32.76	31.3	40.74	41.79	28.51	30.34	35.88	33.63	53.27	48.39	49.21	54.24	46.17	44.69	45.74
Rab7l1	15	15.06	13.87	13.74	12.99	13.87	14.7	12.58	12.63	15.58	14.46	18.15	17.6	15	15.28	14.34	18.26	16.99	19.79	21.14	25.12	17.63	16.39	21.12	19.22	37.34	31.79	33.09	22.33	25.92	29.37	29.1
Rai14	19.57	18.65	19.47	19.29	17.66	18.92	19.06	18.53	19.56	18.14	19.25	16.49	15.65	16.75	16.89	18.28	16.06	16.35	15.07	13.14	12.45	15.28	13.41	12.89	13.24	8.48	8.56	8.32	10.35	10.02	9.79	10.01
Ramp1	1.77	1.74	2.28	1.98	1.68	1.3	1.92	1.98	3.43	2.3	2.51	1.68	1.32	1.37	1.23	1.35	1.15	1.24	2.08	1.12	1.01	0.94	0.78	1.54	1.09	1.11	0.64	0.84	0.77	0.83	0.74	0.77
Rap2a	64.82	60.3	62.69	56.94	60.22	50.52	52.36	50.39	55.95	60.54	61.43	45.81	46.13	35.17	36.42	36.29	48.05	47.47	43.69	44.36	41.04	30.61	33.6	39.16	38.75	36.36	35.73	35.22	30.72	29.5	29.48	31.14
Rasgef1b	15.38	13.92	15.77	17.49	17.52	21.29	20.41	20.93	18	18.12	18.36	21.99	23.07	23.43	23.37	27.07	24.31	26.65	24.85	24.22	26.49	24.09	25.12	26.2	27.43	28.6	30.78	29.74	23.31	28.31	29.47	28.1
Rassf8	17.54	16.05	14.92	17.22	15.62	16.01	16.73	16.66	16.58	15.9	16.54	15.02	12.74	14.32	15.18	16.26	13.76	14.01	13.39	10.48	11.1	15	14.33	12.16	12.73	6.93	5.86	7.02	8.82	8.6	7.49	7.74
Rbm43	14.07	14.02	14.36	13.71	12.67	11.73	12.49	11.23	12.47	12.07	12.61	14.71	14.73	13.21	12.87	12.76	14.38	16.02	13.84	19.5	21.24	13.89	14.24	18.25	19.93	28.06	28.63	26.14	17.86	22.12	24.48	20.62
Rcsd1	11.2	11.46	10.9	10.17	10.42	10.27	11.07	9.79	10.32	10.53	9.89	6.18	6.26	5.04	5.24	5.81	6.37	6.75	6.08	6.33	6.47	4.87	5.7	6.65	6.46	6.35	5.78	6.12	7.39	7.07	6.36	7.4
Rell1	14.54	13.14	13.03	12.57	13.3	12.63	13.06	12.46	13.29	13.7	12.68	6.81	7.01	5.67	5.57	5.86	7.18	6.95	7.69	7.5	8.06	7.41	6.96	7.28	7.56	11.84	11.62	11.68	10.14	10.9	10.38	9.69
Relt	1.74	1.91	2.03	1.69	2.09	1.39	1.76	1.27	1.75	1.1	1.35	1.25	1.04	1.23	1.06	1.25	1.15	0.73	1.16	1.21	1.06	2.1	1.6	1.11	0.81	0.64	0.71	0.67	1.32	0.72	0.85	0.77
Rftn1	22.33	25	23.35	25.03	25.22	21.99	24.25	22.99	24.7	23.66	23.89	12.01	12.1	9.72	10.14	9.69	12.78	12.03	11.8	14.44	14.04	12.48	12.55	13.54	12.71	17.03	17.94	17.07	15.88	17.5	15.54	15.07
Rgcc	1.9	1.26	1.99	1.76	1.72	1.29	1.79	1.05	1.22	1.98	1.73	4.06	4.04	6.46	5.8	6.04	3.84	4.43	3.56	3.36	3.58	4.37	3.74	3.5	2.54	3.35	2.04	1.79	2.61	2.65	2.5	2.16
Rgl1	4.33	6.37	5.44	6.47	6.33	8.4	7.96	8.72	4.81	5.3	5.16	8.4	8.63	12.15	11.58	12.35	7.62	7.34	8.29	10.09	10.61	14.64	12	9.52	10.61	10.33	10.2	9.07	10.22	10.07	11.51	9.77
Rgs1	81.85	61.31	63.19	59.88	59.5	56.04	55.43	54.06	66.81	68.29	71.08	44.27	43.85	28.1	33.37	30.32	44.81	44.63	42.37	42.53	37.5	22.17	27.23	29.39	30.05	27.77	25.35	23.04	15.94	18.05	19.35	19.14
Rgs11	0.9	0.83	0.68	1.27	1.18	1.04	0.9	0.87	1.47	0.84	0.8	1.97	1.47	2.49	1.79	1.6	1.21	0.9	1.78	1.34	1.38	2.03	2.05	2.15	1.48	1.14	1.55	1.33	1.64	1.71	1.66	2.11
Rgs12	3.53	2.91	2.75	3.38	3.58	3.02	3.2	2.97	2.77	3.36	2.96	1.73	1.53	1.55	1.45	1.21	1.75	1.69	1.63	1.91	1.59	1.55	1.34	1.61	1.62	1.5	1.07	1.31	1.42	1.45	1.65	1.45
Rgs16	5.04	6.42	5.13	7.44	5.99	8.52	8.52	9.5	5.89	6.64	5.67	4.36	5.22	6.71	6.03	6.9	5.15	4.25	4.73	4.14	3.23	3.19	2.65	3.12	3.44	1.51	1.77	1.84	0.79	1.74	1.11	1.4
Rgs2	64.97	57.38	54.06	53.69	51.11	41.02	45.57	44.8	53.51	57.58	60.85	42.36	43.96	28.7	31.13	29.21	44.28	45.53	40.28	48.43	46.75	33.74	31.51	39.63	38.25	59.78	55.19	56.74	34.1	37.12	45.69	41.69
Rhof	7.41	6.58	7.28	7.37	6.98	7.34	8.45	7.7	7.6	6.18	6.6	2.98	3.28	2.29	2.73	2.72	3.41	2.85	2.98	3.66	3.2	3.37	3.53	3.39	3.25	3.24	3.47	3.48	2.99	2.83	3.08	2.73
Rilpl1	6.57	6.89	6.92	6.22	6.61	5.13	5.68	6.6	6.56	6.04	5.51	4.28	4.45	3.83	4.59	4.5	4.22	4.56	3.99	4.86	4.61	3.45	3.23	3.86	3.77	4.74	3.78	4.36	3.43	3.86	3.46	3.4
Rn4.5s	17.96	35.73	20.52	29.03	18.75	66.28	28.44	0	58.59	38.95	26.96	26.3	36.97	0	44.02	51.73	0	37.67	45.68	34.44	21.61	42.77	35.66	38.63	27.41	26.87	19.15	25.75	27.53	51.38	0	88.24
Rn45s	68.87	103.52	206.74	176.43	92.99	238.95	92.24	76.15	120.02	107.96	84.4	116.37	167.93	238.7	101.84	125.83	86.8	86.62	149.93	147.25	134.87	108.98	126.9	106.63	85.51	130.26	104.26	216.85	113.25	230.15	133.68	334.81
Rnase4	82.39	92.91	94.91	90.81	91.07	71.88	87.37	83.38	78.42	89.55	83.62	54.29	54.47	41.7	44.63	41.88	61.86	57.95	54.82	44.66	41.99	24.21	25.43	43.32	40.62	45.23	40.25	39.47	24.82	32.08	32.86	34.47
Rnase6	10.89	6.52	8.27	9.42	7.26	6.15	6.86	6.93	6.2	7.33	8.14	5.31	6.46	3.55	3.98	4.38	6.02	5.82	4.29	9.61	10.82	3.89	4.38	8.57	7.72	12.13	12.28	11.95	5.37	7.87	10.4	8.57
Rnasel	13.39	13.73	13.52	12.98	13.38	12.88	13.31	12.91	10.67	12.49	12.51	6.19	7.81	4.95	5.3	6.06	6.15	6.38	6.69	8.78	7.92	5.63	5.21	6.64	7.2	9.13	9.87	9.34	6.67	6.71	7.37	6.87
Rnd3	5.16	5.66	6.16	6.47	6.38	7.91	8.18	7.23	5.86	6.23	6.31	10.04	9.33	11.52	12	11.84	11.14	10.08	9.84	9.96	10.5	15.35	14.38	11.68	12.44	10.35	11.5	10.39	16.68	14.46	13.95	14.43
Rnf114	21.94	23.74	24.25	22.47	23.6	23.19	22.84	22.57	23.25	23.28	22.28	35.06	37.08	27.24	27.5	27.75	31.6	33.36	33.69	50.18	52.66	33.19	28.89	37.56	41.3	62.9	63.31	60.56	30.99	47.83	54.08	48.99
Rnf144b	2	1.9	1.77	1.84	1.82	1.24	1.28	1.17	1.42	1.52	1.68	1.98	2.1	0.97	1.18	0.88	1.78	2.03	1.97	4.11	4.86	1.87	1.83	2.99	3.12	10.86	10.68	10.38	4.26	5.69	6.46	5.98
Rnf150	7.21	8.26	7.9	7.23	8.17	6.4	6.85	6.4	7.42	7.31	6.98	2.99	3.18	1.84	1.96	1.88	2.83	2.84	2.93	3.9	3.63	2.27	2.52	3.33	3.03	5.02	5.15	5.57	4.94	4.12	3.96	4.45
Rnf180	4.64	3.97	4.45	4.44	4.06	4.16	4.54	4.52	4.8	4.7	4.98	2.31	2.35	1.89	2.25	2.23	2.65	2.76	2.72	2.54	3	2.78	2.18	2.86	2.65	3.21	4.14	3.51	3.43	3.24	3.83	3.23
Rnf34	15.79	16	16.09	15.67	15.6	14.74	16.54	14.78	16.24	15.58	16.28	24.29	27.03	17.04	19.39	21.03	23.24	24.18	23.98	38.21	42.39	25.2	21.75	32.4	31.06	59.96	53.02	54.85	24.12	37.81	44.73	40.07
Rnpep	48.82	56.15	51.12	50.22	55.54	46.11	50.36	50.37	49.52	49.33	50.39	62.87	65.83	54.44	58.4	58.36	58.87	57.39	62.04	86.17	86.47	72.22	71.52	73.83	78	113.23	110.9	105.37	87.36	91.42	97.57	85.99
Rpl31-ps12	203.28	194.45	204.22	194.68	200.4	184.15	199.33	206.44	190.49	191.84	201.52	201.04	189.85	193.23	193.3	209.98	195.16	211.83	198.25	194.65	193.32	219.61	205.57	209.77	202.93	194.25	206.59	200.72	221.59	205.94	216.4	214.27
Rprd1a	4.03	4.03	3.66	4.34	4	3.88	3.87	3.93	3.52	4.02	4.39	5.82	5.83	5.81	6.13	5.95	5.83	6.14	5.91	6.2	6.8	7.23	6.91	7.9	7.61	6.78	6.75	7.03	8.39	8.16	8	8.94
Rps6ka2	7.13	7.69	7.72	7.37	7.67	7.2	7.59	7.5	6.54	7.55	7.14	3.97	4.1	3.72	3.82	3.47	4.07	4.31	4.2	3.61	3.2	2.59	2.86	3.41	3.55	3.14	2.84	3.28	2.6	2.62	2.65	3.08
Rsad2	1.64	1.83	1.67	1.71	2.05	3.07	1.88	1.93	1.53	1.43	1.49	33.68	45.64	5.55	7.07	7.69	17.68	19.97	22.77	95.23	80.45	11.62	8.69	27.24	30.23	132.97	135.79	129.67	7.83	50.04	85.84	44.38
Rtp4	11.85	17.42	12.12	13.03	14.48	12.91	14.5	13.1	12.65	13.66	13.13	35.4	48.61	14.82	17.2	21.04	22.42	33.85	35.41	95.13	107.06	41.1	21.85	62	72.37	162.03	159.35	151.41	43.4	120.17	132.83	119.7
Runx2	2.87	2.58	2.25	2.42	2.68	2.42	2.17	2.8	3.47	3.34	3.93	1.56	1.74	1.64	1.15	1.04	1.54	1.45	1.44	1.39	1.42	1.48	1.54	1.41	1.35	1.25	1.24	1.52	1.43	1.49	1.3	1.33
Runx3	2.41	1.71	2.41	2.24	2.18	1.56	1.63	1.97	1.95	2.2	1.71	1.93	1.78	1.7	1.7	1.84	1.57	1.51	1.95	1.57	1.81	1.87	2.01	1.82	1.94	0.71	0.96	0.76	1.03	0.83	0.76	0.71
S1pr1	27.87	24.45	25.23	22.6	22.45	16.51	16.05	17	25.41	27.18	24.95	9.48	10.52	5.85	6.48	6.66	11.63	10.59	9.97	12.77	12.05	6.08	8.58	10.55	10.18	14.63	13.24	14.54	11.96	11.4	12.03	12.98
Saa3	0.36	0.24	1.25	0.71	1.66	2.9	4.3	2.85	0.43	1.03	0.39	6.78	5.42	37.41	42.72	48.48	6.4	7.73	9.67	15.96	14.63	135.4	118.18	28.18	33.99	31.66	32.46	29.51	148.55	72.59	77.43	60.68
Samd9l	14.48	15.57	13.65	14.71	14.77	16.07	14.85	14.34	14.45	14.88	15.56	27.45	33.52	19.28	19.92	21.35	23.67	23.31	26.39	55.71	58.97	30.26	25.99	39.02	43.47	88.15	85.58	83.69	29.55	57.55	64.7	58.77
Samhd1	44.08	46.11	43.34	43.1	44.98	39.04	41.91	42.9	42.61	40.12	41.96	60.74	70.09	48.94	51.87	52.04	53.94	54.95	61.23	117.16	126.6	79.13	71.24	87.86	91.62	220.2	214.43	202.9	93.87	135.86	152.61	131.33
Sc5d	43.36	45.22	42.55	42.93	41.62	42.22	43.86	45.26	42.83	42.67	44.39	18.36	17.19	15.5	15.89	16.52	18.17	17.29	17.51	17.44	16.47	15.63	14.38	19.12	17.94	17.7	18.21	17.8	15.82	17.96	17.55	18.23
Scand1	2.62	1.31	3.42	2.97	2.64	0.88	1.02	2.51	4.13	5.5	1.62	8.57	5.86	6.13	5.74	1.68	2.66	1.77	9.52	7.44	5.43	0	4.63	3.44	1.33	5.79	6.76	6.12	8.42	9.11	3.86	1.83
Scarf1	3.94	3.62	3.77	4.08	3.8	4.17	3.38	3.69	4.3	4.06	3.86	4.33	5.15	4.13	4.5	4.17	3.85	4.63	4.18	6.07	6.3	5.66	4.03	5.19	4.1	9.58	9.61	8.16	5.77	7.35	6.65	6.04
Scd2	13.25	13.08	12.77	12.12	13.01	10.36	11.36	10.01	13.18	12.81	13.17	5.54	4.37	4.53	3.95	4.27	4.65	4.23	4.41	4.41	4.34	3.45	4.31	4.31	4.32	3.76	3.88	3.68	4.3	3.61	4	3.36
Scmh1	9.15	10.3	9.81	10.33	9.5	9.08	9.26	9.4	8.3	8.65	9.3	5.46	5.59	4.91	4.92	4.59	6.17	5.9	5.75	5.84	5.44	5.08	5.05	5.34	5.52	3.95	5.18	4.29	5.07	4.63	4.54	4.79
Sdc1	16.62	16.83	16.93	17.24	17.49	17.83	19.79	21.99	17.24	18.73	17.99	38.66	37.52	59.47	56.29	61.75	34.11	35.4	39.09	43.21	45.23	84	80.19	40.56	47.64	42.59	43.62	43.33	73.7	61.15	60.89	50.59
Sdc3	108.24	116.42	112.01	115.39	117.81	96.32	111.31	107.18	113.01	108.39	105.96	97.59	106.06	83.88	85.72	82.21	87.95	93.11	98.85	153.82	161.11	90.73	89.99	109.61	113.78	278.58	280.49	270.63	113.21	181.87	190.72	156.63
Sdf2l1	66.86	68.1	70.94	70.34	70.51	65.11	65.48	64.44	72.04	73.69	61.37	123.09	121.05	111.72	113.03	106.22	120.02	117.27	137.28	132.09	134.07	87.84	115.02	126.79	112.44	138.82	146.81	145.64	120.25	123.24	131.64	114.5
Sel1l3	1.82	1.31	1.76	1.49	1.3	1.55	1.4	1.58	1.65	1.48	2.09	0.65	0.93	0.84	0.66	0.78	0.86	0.88	0.92	0.96	0.95	1.09	1.14	0.89	0.82	1.11	0.96	1.07	1.12	1.12	0.88	0.82
Sema4a	2.68	2.22	3.02	3.08	2.98	2.73	2.46	3.36	2.99	3.12	2.63	3.26	3.42	3.82	3.62	4.25	3.26	3.38	3.69	4.05	4.02	5.7	5.47	4.7	4.68	4.33	4.41	4.4	6.52	5	5.44	4.8
Sema4c	3.61	3.7	3.27	3.13	3.17	2.87	2.49	2.58	3.52	3.31	3.13	1.86	2.14	1.51	1.39	1.49	1.54	2.14	1.97	1.98	1.72	1.31	1.4	2.03	1.33	1.77	1.82	1.57	1.85	1.32	1.4	1.4
Sepp1	130.85	157.64	154.24	143.75	138.64	130.16	149.86	140.5	137.18	154.52	149.77	98.98	99.11	87.4	88.74	91.99	109.99	104.5	105.09	88.26	88.56	71.6	63.14	83.98	80.68	130.96	125.06	126.3	95.6	104.26	101.68	102.55
Sepw1	83.71	86.69	91.74	81.5	78.37	78.47	83.98	81.42	84.05	82.52	86.59	100.84	98	96.88	94.87	99.9	98.32	102.86	99.92	142.76	147.07	132.45	122.27	138.29	137.84	227.63	215.4	210.48	140.64	184.99	181.29	175.94
Serpinb8	10.81	11.79	14.01	12.94	14.07	14.88	16.17	14.37	11.32	11.34	11.88	21.07	21.37	28.09	28.99	30.52	20.11	21.42	25.96	20.53	23.36	35.14	32.17	26.55	29.74	23.29	27.21	23.22	29.67	29.68	30.7	29.59
Serpine1	32.74	25.88	27.38	25.92	22.95	26.9	24.89	28.2	28.31	27.94	30.24	26.21	27.12	27.2	28.24	27.38	27.19	27.77	27.94	18.85	17.93	18.37	18.74	19.55	19.85	9.09	8.82	8.82	8.11	9.59	9.76	10.19
Sertad3	5.77	6.09	6.35	5.51	6.59	5.02	5.99	5.65	5.75	3.84	5.42	6.11	5.34	5.33	5.02	5.58	6.55	6.34	5.79	7.76	8.78	7.9	5.45	6.43	6.69	12.03	12.03	12.45	8.18	10.58	9.85	8.22
Sesn3	2.02	1.86	1.98	2.01	2.26	1.89	2.2	2.09	1.85	1.98	2.14	1.21	1.27	1.03	0.97	0.87	0.64	1.25	1.41	1.07	1.31	0.4	1.07	1.16	1.43	1.51	1.63	1.84	0.83	0.91	1.17	1.22
Setdb2	5.9	5.87	4.82	4.55	5.64	4.51	5.03	4.91	4.94	5.09	4.53	7.11	7.73	4.53	5.85	5.53	5.6	6.37	5.88	9.26	9.27	4.34	5.23	5.92	5.98	13.61	12.13	12.93	5.94	8.39	10.63	8.64
Sfi1	1.93	2.08	2.05	2.19	2.4	2.61	2.12	2.08	3.2	2.61	2.95	3.46	3.52	3.61	3.55	2.68	3.24	3.39	3.41	4.23	3.53	3.49	3.79	3.91	3.31	4.51	4.47	3.86	3.72	3.8	3.46	4.01
Sfn	5.63	6.44	6.07	5.97	6.12	6.07	4.96	6.34	5.52	5.62	4.53	2.72	2.58	2.85	2.57	2.2	2.55	1.92	2.2	2.84	2.8	3.7	2.38	2.15	2.65	2.94	2.45	2.23	2.68	2.67	2.45	2.74
Sgk1	75.59	72.55	74.84	70.34	69.7	58.43	63.29	60.52	77.19	77.49	75.71	42.4	45.31	33.12	34.87	32.55	44.23	45.48	41.58	46.04	43.37	28.64	32.45	36.79	35.89	47.65	46.36	45.02	34.64	42.46	46.09	38.77
Sgsh	12.94	13.04	13.21	12.2	12.87	10.15	11.93	11.32	13.09	12.17	12.55	7.89	8.07	5.99	6.17	6.15	8.12	7.11	7.58	7.72	7.6	6.29	6.41	7.31	6.44	9.04	9.49	8.89	9.26	8.94	8.33	7.95
Sh2b2	10.34	9.54	9.23	10.09	10.78	9.93	9.68	9.61	12.53	11.27	9.68	6.88	6.36	6.66	7.04	5.24	5.61	5.74	7.02	5.19	4.89	4.45	4.92	4.53	3.82	3.48	3.18	3.52	4.53	4.55	2.83	2.69
Sh2d1b1	12.1	9.94	10.36	10.14	9.29	7.93	9.21	7.76	11.74	10.56	11.11	6.39	7.01	5.04	4.6	5.14	5.85	6	5.45	7.91	6.64	5.58	4.51	7.26	6.43	8.91	9.11	10.4	8.82	9.05	8.69	10.41
Siglec1	10.24	13.16	10.65	12.17	12.42	10.33	11.94	10.74	12.23	11.14	11.89	10.86	11.91	8.46	8.76	8.45	10.86	11.82	11.23	18.44	18.55	9.66	7.24	12.58	12.51	50.3	51.56	49.16	9.63	24.12	25.06	22.9
Siglece	1.27	1.66	2.5	2.12	1.55	1.56	1.89	1.9	1.36	1.7	0.78	1.56	1.9	3.35	2.98	3.41	1.57	1.59	2	2.96	2.6	6.26	6.19	3.19	3.11	2.76	2.36	2.28	7.2	4.5	5.44	5.01
Sirpb1a	5.79	7.17	7.45	6.55	7.11	5.84	7.36	6.36	6.35	5.34	6.09	7.9	8.69	6.92	8.15	7.71	8.28	8.65	7.17	10.58	11.52	10.95	11.67	10.64	10.05	14.34	14.92	14.73	15.71	14.78	17.61	15.93
Sirpb1b	8.04	9.04	8.14	7.28	7.42	7.13	7.79	7.32	7.39	6.66	7.06	9.28	8.86	7.46	8.43	8.78	9.28	10.55	8.75	12.37	13.46	12.33	13.16	12.86	11.84	19.21	17.98	19.17	19.47	18.52	20.16	17.09
Slamf7	3.58	3.03	2.92	3.31	3.59	4.11	4.13	4.2	3.08	3.44	3.54	2.89	3.2	3.05	2.81	3.66	3.55	3.03	3.02	4.4	4.41	2.84	2.72	3.71	3.82	10.87	9.61	8.75	3.66	5.27	7.38	5.7
Slamf8	0.4	0.84	0.95	1.02	0.88	0.82	1.6	1.37	0.93	0.81	0.79	1.54	1.44	2.49	2.24	2.94	1.62	1.12	1.79	3.22	2.91	4.26	3.65	3.47	3.42	5.01	4.02	3.74	3.59	5.11	4.61	4.05
Slc12a9	6.95	6.54	6.98	7.25	7.56	5.86	5.56	7.15	7.83	6.42	7.2	9.77	9.51	8.74	9.1	8.08	10.3	9.96	9.66	10.32	10.55	8.49	9.8	9.3	8.41	14.27	13.7	13.2	10.04	10.49	12.21	9.89
Slc13a3	1.11	2.2	1.9	2.26	1.57	2.16	2.83	2.53	1.81	1.79	1.63	3.72	3.45	4.51	4.54	5.21	3.08	2.94	3.74	3.03	3.84	9.53	5.82	3.29	4.43	4.37	4.58	3.94	13.46	7.64	6.75	6.31
Slc16a3	53.5	50.52	53.4	54.54	52.66	48.38	48.36	53.8	54.87	55.21	50.32	131.93	125.83	144.46	135.93	127.77	119	121.97	128.57	126.75	129.13	128.98	148.24	122.95	117.06	83.13	78.33	84.06	104.43	106.08	89.92	83.5
Slc16a6	17.44	19.21	17.66	17.64	17.91	17.2	17.57	16.42	15.4	17.29	16.87	13.42	12.55	13.09	13.17	13.77	12.89	11.8	12.24	11.72	11.13	12.84	13.21	11.84	12.25	6.73	6.67	7.17	10.82	9.31	7.62	9.31
Slc17a5	20.2	20.87	20.98	22.07	21.45	19.52	21.16	19.49	19.01	21.06	20.93	13.15	12.38	11.14	11.59	10.75	12.26	12.55	12.4	13.91	13.56	9.19	10.94	12.47	12.16	16.18	14.11	16.09	14.34	15.31	14.46	13.22
Slc1a4	1.24	0.83	0.91	1.02	1.09	1.07	0.86	1.2	1.06	1.05	1.27	1.68	1.76	1.48	1.75	1.66	1.53	1.56	1.9	1.95	1.96	1.62	1.83	1.53	1.88	1.18	1.38	1.33	1.09	1.05	1.13	1.23
Slc23a2	61.88	60.04	59.06	58.36	57.85	58.23	59.56	58.06	55.69	58.46	59.51	42.98	43.33	44.44	44.38	42.77	44.13	45.28	40.77	36.47	35.97	36.4	34.84	35.6	35.45	32.89	31.56	30.54	27	28.5	27.34	29.95
Slc25a22	10.1	9.88	10.88	10.89	10.47	9.24	10.74	10.22	11.52	10.16	10.83	20.08	24.45	17.02	18.6	18.32	17.56	19.39	19.65	28.34	30.42	20.12	18.65	21.21	18.55	39.22	38.43	35.06	16.58	24.76	28.99	23.56
Slc26a11	4.05	3.84	3.19	3.86	3.28	2.91	3.64	3.3	3.86	3.56	2.85	1.45	1.43	0.92	1.13	1.5	1.21	1.42	1.48	1.8	1.84	1.68	1.58	1.48	1.49	3.37	2.97	3.12	2.71	2.52	2.28	2.23
Slc28a2	2.18	2.41	2.09	2.09	2.44	2.89	2.68	2.41	2.2	2.41	2.56	2.68	3.08	2.28	2.31	2.91	3.03	2.73	2.59	4.76	4.5	2.64	2.95	3.43	3.61	9.01	8.58	8.04	3.41	4.88	5.79	5.07
Slc29a2	1.99	2.51	2.85	2.13	2.47	2.73	1.52	2.06	2.41	2.12	2.45	2.71	2.25	2.3	2.95	2.36	2.66	2.11	2.55	2.12	1.72	2.19	2.81	1.9	1.89	1.13	0.88	1.37	1.59	1.33	1.49	1.29
Slc2a1	67.11	58.57	64.61	67.89	63.25	67.71	64.18	71.51	64.48	70.37	68.75	117.69	109.69	137.92	136.72	127.85	109.75	114.89	114.88	87.54	85.27	105.76	105.43	89.3	95.05	41.96	42.94	45.33	61.53	59.59	54.95	56.57
Slc2a3	9.45	8.97	8.39	8.53	8.7	7.98	8.97	8.62	7.98	8.85	8.9	5.33	5.51	4.53	5.19	5.07	5.77	5.58	4.68	5.46	5.21	3	4.09	4.79	4.32	4.78	4.77	4.58	4.21	4.02	4.13	4.26
Slc39a14	25.27	25.9	25.45	26.3	25.86	26.02	25.8	26.69	24.07	24.27	24.39	22.98	22.16	23.42	23.37	25.57	23.3	23.79	22.89	17.89	17.95	19.93	20.66	17.97	19.97	8.32	9.27	9.34	12.43	11.08	9.3	11.9
Slc39a4	1.37	1.68	1.91	2.03	1.49	2.47	1.96	2.04	1.6	1.49	1.71	3.89	3.04	3.87	3.63	3.89	2.86	2.51	2.63	3.73	3.54	4.91	5.25	3.11	3.27	3.68	3.72	3.37	4.83	5.35	4.59	4.51
Slc40a1	3.38	2.72	2.49	2.13	2.15	2.01	2.06	1.94	2.19	1.98	2.14	1.17	1.44	0.78	0.9	1.01	1	1.37	1.19	1.73	1.74	2.47	2.1	1.77	1.77	2.01	2.24	1.55	3.4	2.27	2.88	2.58
Slc46a3	4.38	3.93	4.21	3.78	4.1	3.66	3.88	3.62	4.16	3.44	3.71	2.07	1.79	1.68	1.78	1.61	2.3	2.35	2.15	2.48	2.56	1.77	1.48	1.95	1.93	3.94	3.62	3.55	3.21	2.86	3.34	3
Slc7a11	2.38	2.49	2.56	2.59	2.43	4.03	3.8	4.61	2.52	2.65	2.58	2.5	2.42	5.59	5.08	5.78	2.64	2.87	2.68	2.78	2.49	7.66	6.71	3.49	4.17	2.25	2.52	1.97	3.8	3.46	2.94	3.52
Slc7a5	35.08	36.98	37	38.5	37.11	33	36.65	38.13	35.81	36.04	36.05	31.32	29.14	33.58	32.45	30.45	27.27	29.33	27.18	22.79	23.04	26.41	27.93	19.87	21.95	14.07	14.2	13.89	16.43	16.53	14.71	15.2
Slc9a3r1	39.77	39.24	44.45	40.37	37.95	30.98	31.39	33.48	39.07	39.02	31.18	25.87	26.99	20.27	22.81	17.34	20.77	22.42	24.5	31.92	32.05	19.28	24.52	25.54	23.85	40.25	41.3	40.21	37.49	37.24	35.44	29.26
Slc9a9	14.1	18.38	16.67	18.09	18.85	16.22	17.88	17.21	16.71	15.99	16.57	7.81	7.53	6.2	7.55	6.35	8.27	8.38	7.19	3.78	4.28	2.39	2.09	4.61	4.63	5.57	4.97	4.89	3.68	4.28	3.99	4.98
Slco2b1	5.31	5.43	5.21	5.45	5.14	4.26	4.2	4.17	5.48	5.45	5.96	1.84	1.99	0.79	0.98	1.03	2.05	2.99	1.88	2.46	2.5	1.07	0.75	2.28	1.92	3.27	3.19	2.88	1.61	2.04	1.7	2.26
Slco3a1	1.2	1.22	1.53	1.49	1.55	1.64	1.13	1.24	1.17	1.29	1.29	1.75	2.09	2.62	2.52	1.87	2.02	2.16	2.09	2.97	2.98	2.4	2.82	2.56	2.63	4.07	3.77	3.85	2.46	3.3	3.5	3.35
Slfn1	0.07	0.2	0.07	0.1	0.05	0.08	0.14	0.12	0.08	0.14	0.08	0.41	0.8	0.16	0.27	0.24	0.09	0.28	0.21	2.63	1.85	0.46	0.23	0.56	0.85	7.58	7.1	5.38	0.27	1.53	3.17	1.57
Slfn2	133.31	159.78	148.85	169.81	170.77	209.79	224.35	218.42	146.79	147.1	152.89	180.82	200.36	184.57	188.3	209.42	172.87	194.34	193.9	248.65	267.8	211.15	174.44	215.67	240.66	373.91	382.15	363.09	168.08	271.13	313.6	262.04
Slfn3	6.31	7.14	6.23	6.3	6.85	5.83	7.23	7.22	5.73	6	6.54	11.14	12.61	9.6	8.55	9.65	8.87	11.72	10.57	14.57	15.81	12.14	8.83	11.99	11.57	26.75	28.97	25.96	10.09	16.36	19.96	15.47
Slfn4	2.62	3.12	2.67	3.12	3.4	3.62	3.74	3.96	3.07	3.14	2.91	3.57	4.3	3.86	3.99	4.65	3.85	3.66	3.84	5.8	6.09	4.06	3.32	4.79	4.61	10.37	10.42	9.76	3.42	5.57	7.22	6.09
Slfn5	7.68	10.14	7.81	9.46	8.23	10.07	9.1	8.79	9.09	8.33	8.98	24.56	33.27	11.46	13.67	13.86	17	18.58	23.23	68.02	73.7	22.55	13.89	38.91	41.5	151.99	145.48	134.23	23.15	72.33	93.17	71.63
Slfn8	6.7	7.57	6.71	7.39	7.95	8.66	7.6	8.09	6.61	7.44	6.9	19.45	26.8	9.6	10.8	11.81	14.04	16.96	18.19	40.76	43.19	14.38	10.49	25.19	26.32	68	67.33	63.51	15.15	37.83	50.19	38.27
Slfn9	10.53	10.47	10.51	9.43	10.26	9.57	9.53	9.69	7.74	8.71	8.09	19.83	21.26	15.48	14.78	15.57	19.48	20.53	20.1	27.14	28.8	17.5	15.03	21.66	22.08	43.98	41.8	40.75	18.74	25.25	28.87	27.33
Slmo1	4.03	3.5	3.64	2.96	3.06	3.75	3.61	3.34	4.54	3	3.19	1.75	1.94	1.99	1.94	2.06	2.01	2.06	2.29	1.39	1.79	1.73	2.26	2.13	1.65	1.4	1.56	2.04	1.51	1.34	2.23	1.37
Slpi	0.18	0.12	0	0.18	0.15	0.52	0.57	0.2	0.54	0	0	0.65	0.23	1.89	0.94	1.3	0.49	0.67	0.67	0.73	0.82	4.23	3.06	1.23	1.66	1.21	1.85	1.34	4.37	2.12	2.3	1.63
Slx4ip	4.32	4.09	4.36	4.81	4.21	3.51	4.08	4.37	3.79	3.65	4.5	6.62	6.47	7.82	6.49	7.43	7.47	6.36	6.88	6.2	6.47	13.49	7.61	5.67	8.32	5.49	6.23	5.02	6.98	6.3	6.71	6.7
Smad7	8.4	8.41	8.1	8.41	8.06	7.97	7.65	8.1	8.04	8.54	8.43	5.34	5.75	4.77	4.84	4.88	5	4.47	5.61	4.46	4.45	3.65	3.75	4.37	4.12	4.22	3.69	3.8	3.36	3.69	3.4	3.5
Smagp	17.35	21.42	19.35	19.47	19.24	15.01	17.56	17.09	18.17	18.14	18.79	10.32	10.4	7.25	8.62	6.91	10.27	10.61	7.66	12.24	10.83	4.83	6.93	8.85	9.15	12.89	10.55	11.87	9.55	12.29	8.59	11
Snhg12	14.26	12.94	15.1	13.62	13.52	12.64	14.65	15.17	14.05	10.88	15.02	14.24	13.1	12.34	13.19	13.4	13.13	13.3	11.03	8.56	10.5	16.55	13.5	9.34	11.13	6.2	6.84	6.89	9.75	9.64	10.93	9.95
Snhg5	17.7	21.02	17.46	17.4	16.82	19.44	18.64	18.37	17.91	18.34	20.15	13.95	14.56	19.42	18.63	18.59	14.78	16.24	14.82	12.38	11.58	17.52	14.43	14.7	14.66	8.47	9.45	7.64	11.99	9.95	11.21	13.86
Snx24	17.61	19.07	17.15	18.18	18.42	12.85	15.42	13.63	14.78	13.65	14.11	10.39	10.87	7.75	8.6	6.58	11.1	12.02	10.85	10.4	11.01	8.86	9.59	9.75	10.37	11.81	14.03	12.43	13.07	11.34	10.21	11.55
Snx29	8.49	8.91	7.36	8.83	8.9	9.1	9.06	7.47	7.35	7.93	7.47	4.39	5.52	4.64	4.47	4.58	4.52	5.8	4.18	4.96	4.85	3.18	4.6	4.51	4.24	5.96	6.21	5.65	5.73	5.48	6.07	5.11
Socs3	3.2	4.18	4.04	7.05	5.65	13.2	12.86	13.06	5.84	6.37	5.4	7.29	7.11	20.16	19.51	22	8.91	9.7	10.02	5.3	4.96	18.25	14.46	8.5	9.98	2.81	2.91	2.97	6.03	6.18	6.76	5.91
Sod2	27.11	28.18	28.07	31.57	31.28	39.75	40.39	41.76	26.62	27.87	27.76	45.81	45.23	78.22	71.05	78.01	45.36	45.15	46.54	41.97	44.07	87.78	84.26	51.77	61.48	38.18	38.75	37.99	67.9	60.09	59.38	51.88
Sox4	3.09	2.84	3.18	2.55	2.59	1.82	1.95	2.11	3.5	2.93	3.09	2.09	2.03	1.64	1.69	1.41	1.92	2.14	2.17	1.75	1.51	1.62	1.13	1.6	1	1.66	2.2	1.63	1.45	1.38	1.21	1.25
Sp100	16.73	19.98	16.04	16.37	18.66	18.2	18.24	17.75	16.98	16.19	18.9	22.46	28.51	14.13	15.42	17.29	18.65	21.54	21.08	64.84	71.27	25.24	19.02	43.26	47.39	136.72	131.44	126.15	30.38	74.89	87.37	75.93
Sp110	15.68	18.25	16.23	17.93	18.06	14.77	16.03	15.58	16	15.8	16.97	16.92	20.98	12.54	11.76	12.96	14.36	18.01	16.59	40.48	42.92	18.14	13.98	26	29.74	85.91	85.38	80.48	18.62	44.06	46.44	43.38
Sp140	8.66	9.31	8.9	8.95	8.52	8.46	8.16	9.12	8.6	8.64	9.65	10.27	13.07	7.83	8.65	7.83	10.63	10.74	10.95	19.93	19.57	8.25	8.35	13.71	12.29	33.51	32.69	30.27	9.63	19.15	23.43	18.91
Spic	0.76	0.85	1.02	1.07	0.73	1.35	1.52	1.72	0.83	0.33	0.61	0.5	0.59	1.82	1.61	1.73	0.94	1.1	1.2	1.04	0.79	2.94	2.39	0.99	1.66	1.55	0.99	0.76	1.71	1.44	2.06	1.74
Spice1	1.24	1.25	1.19	1.19	0.88	1.09	1.08	1.29	1.42	1.15	1.39	2.63	2.73	2.43	2.82	2.68	2.42	2.59	2.54	3.1	2.8	2.72	2.61	3.49	3.18	2.41	2.4	2.5	3.15	2.25	3.03	3.09
Spire1	29.54	31.5	31.41	31.02	31.81	31.18	31.52	30.72	31.89	32.45	33.15	16.72	18.14	15.06	15.7	15.68	17.67	17.55	16.17	18.92	18.48	15.4	16.07	17.38	18.16	15.84	16.26	16.26	13.97	13.68	13.48	14.74
Sqle	85.9	81.39	85.4	81.53	83.12	75.3	82.72	82.18	84.03	86.2	82	41.12	41.02	37.68	37.31	37.6	40.23	43.78	39.88	39.43	40.82	35.44	38.48	40.42	40.88	43.63	44.68	42.3	40.33	42.05	39.46	39.31
Src	0.83	1.13	0.83	1.4	1.42	1.65	1.96	1.53	0.75	0.81	0.93	0.56	0.73	1.36	1.24	1.49	0.78	0.96	0.68	0.64	1.08	1.79	2.3	1.22	1.42	1.43	1.4	1.09	1.87	1.78	1.88	1.19
Srsf5	139.47	154.38	138.01	140.09	146.87	151.06	148.85	138.81	140.8	138.04	133.96	62.24	62.59	71.42	65.81	66.36	67.36	64.71	67.75	78.35	77.57	94.8	82.54	100.71	99.5	94.3	93.1	98.46	97.97	101.13	104.13	110.49
St18	1.45	1.23	1.65	1.38	1.29	1.52	1.37	1.63	1.76	1.82	1.62	2.16	2.29	2.18	2.28	2.38	2.17	1.5	2.21	2.47	2.33	3.19	3.51	2.86	2.51	2.16	2.09	2.34	2.97	3.17	3.21	2.78
St6gal1	12.94	13.03	13.94	13.06	12.91	11.07	12.06	11.73	13.1	12.4	13.4	6.84	7.31	4.92	4.83	5.07	7.45	7.26	6.74	10.95	10.57	8.7	8.12	9.92	10.32	13.53	13.92	14.07	16.61	15.1	15.14	15.53
St7	5.52	4.83	4.68	5.23	4.62	6.07	5.41	5.41	4.08	4.55	5.53	5.02	5.09	7	6.59	7.25	5.46	5.52	5.08	5.48	5.97	11.14	10.26	6.09	7.46	4.09	4.44	4.18	7.78	7.37	6.71	6.56
Stard3	23.01	23.33	23.02	22.09	22.85	21.69	19.36	22.21	23.78	23.36	22.5	28.42	32.99	25.23	26.96	22.37	27.49	26.77	27.91	40.74	44.69	26.81	28	33.22	31.02	59.32	58.18	54.44	29.8	42.36	43.09	37.23
Stard4	28.25	28.28	27.63	26.47	28.5	26.41	27.44	25.98	23.18	26.61	27.25	12.16	11.51	11.23	11.15	12.43	12.63	12.18	11.53	14.37	13.25	13.35	13.5	14.56	14.11	14.42	13.99	13.77	15.51	12.41	14.5	15.11
Stat1	14.71	16.43	14.64	16.02	15.8	15.57	15.55	16.17	16.27	15.83	17.08	33.88	45.72	21.01	23.51	25.67	24.34	29.83	34.53	91.75	102.56	34.29	26.3	57.18	63.11	179.3	175.41	161.07	36.26	102	118.07	94.22
Stat2	9.47	10.91	9.43	10.31	10.27	9.61	9.65	9.11	10.33	10.17	9.89	19.2	25.08	8.73	9.8	10.2	13.68	14.97	18.9	43.34	48.58	14.06	11.25	27.55	27.62	89.53	88.34	80.25	16.79	46.07	53	45.68
Stau2	9.79	9.26	9.52	8.39	9.39	8.12	8.04	8	8.31	8.93	8.98	5.71	5.41	5.21	4.98	4.42	5.66	6.36	5.67	5.82	5.17	4.97	4.4	4.89	4.66	4.89	4.49	5.5	5.35	4.08	4.71	5.2
Stk32c	2.76	2.12	2.2	2.41	2.71	2.19	1.78	2.21	3.33	2.97	2.99	1.3	0.91	0.54	0.67	1.01	0.9	1.4	1.11	1.32	1.14	0.78	0.81	1.39	1.25	1.07	1.39	1.36	1.11	1.1	1.5	1.64
Stx16	9.25	9.86	9.83	9.24	9.49	11.87	9.26	9.79	11.7	9.78	10.23	16.44	17.51	15.81	14.41	16.37	15.45	14.77	16.38	20.4	19.99	16.91	13.45	18.35	16.81	25.33	23.91	23.32	14.51	19.39	19	21.66
Taf4b	2.08	2.24	2.23	2.12	2.13	2.3	2.05	2.39	1.91	1.93	2	2.39	2.37	2.54	2.83	2.8	2.38	2.75	2.57	1.77	1.64	1.91	2.29	1.64	1.8	0.98	1.04	1	1.61	1.2	1.52	1.38
Tanc2	1.94	2	2.07	1.9	1.75	2.19	2.01	1.8	1.82	1.59	1.84	0.86	1.04	0.96	1	0.79	1.03	1.15	0.92	1.27	1.22	1.01	1.32	1.23	1.25	0.94	1.24	1.11	1.42	1.43	1	1.32
Tap1	13.71	14.5	13	13.15	14.14	12.49	13.06	12.89	15.01	12.41	12.69	19.09	22.93	11.34	13.79	11.99	13.88	15.24	19.19	39.34	41.8	15.11	12.4	21.58	21.7	68.4	70.22	61.13	16.95	35.24	42.74	32.38
Tap2	18.01	18.63	19.84	19.21	19.87	15.39	17.35	18.18	17.91	17.26	17.06	19.64	21.91	16.54	17.58	15.97	17.29	17.03	19.28	29.58	30.62	19.89	17.81	23.61	21.8	42.9	42.31	39.21	19.39	30.53	32.21	26.51
Tapbp	82.44	88.65	83.31	87.58	86.96	76.54	82.86	87.12	90.37	84.75	78.56	99.6	108.93	95.95	95.46	84.56	85.04	88.23	99.84	157.55	169.31	105.6	100.74	110.78	112.45	295.2	312.61	287.32	123.73	198.69	210.43	159.62
Tapbpl	8.22	8.01	8.07	8.36	8.26	8.36	8.39	8.71	8.11	8.93	7.94	9.16	9.37	8.87	9.04	9.45	8.79	9.16	9.22	12.66	13.01	10.78	9.73	10.57	10.97	19.38	17.81	17.64	9.76	13.53	15.75	13.61
Tardbp	24.71	24.04	24.29	24.54	24.24	26.65	25.19	26.88	26.33	25.03	26.45	49.33	50.55	51.38	52.76	54.84	51.89	52.14	49.36	37.07	38.4	42.4	45.31	39.82	41.5	28.51	29.81	31.84	36.02	32.24	34.11	35.27
Tarm1	2.2	1.36	2.1	1.42	1.69	3.29	2.28	2.75	1.54	2.33	2.23	3.14	2.67	6.53	5.39	6.29	2.96	2.63	2.76	3.17	3.42	7.74	7.05	3.31	5.25	3.58	2.58	2.04	5.31	4.71	4.53	3.6
Tbc1d2	4.31	4.04	3.64	3.31	3.73	2.8	2.9	2.95	3.85	3.66	3.31	1.74	1.76	1.34	1.35	0.78	1.95	1.57	1.66	2.02	1.92	0.89	1.66	1.49	1.55	1.98	2.32	2.32	2.2	2.35	1.64	1.72
Tbc1d9	10.83	9.98	10.2	9.93	11.25	9.31	9.99	8.96	8.69	9.56	9.12	5.34	5.57	4.71	4.36	4.39	5.63	5.83	5.55	6.82	6.78	5.01	5.91	6.26	6.5	7.68	7.79	7.61	7.2	6.58	6.75	6.64
Tbxas1	65.19	67.24	65.37	66.18	64.63	56.29	64.13	63.87	63.8	64.66	64.92	52.27	54.18	48.11	47.3	46.49	54.01	57.38	53.33	40.01	40.5	28.68	30.25	38.42	36.52	36.43	32.52	35.52	28.33	31.11	31.3	32.47
Tcf7l2	8.52	8.52	8.94	8.29	8.32	7.81	6.88	7.36	7.9	7.24	7.98	5.86	5.32	5.66	4.95	4.67	5.31	6.09	4.93	4.73	5.29	4.97	4.65	4.32	4.98	4.15	4.15	3.84	3.98	3.97	3.97	4.05
Tcp11l2	2.02	2.23	2.53	2.33	1.87	1.98	2.2	2.34	2.54	2.29	2.37	2.06	2.38	2.23	1.99	1.86	4.04	3.4	2.6	3.52	3.46	3.09	2.81	3.55	3.5	5.33	5.53	5.86	5.17	5.41	6.03	4.8
Tdrd7	16.49	16.62	16.22	17.37	16.24	15.06	16.84	16.26	17.41	16.3	16.42	19.43	23.22	16.24	16.81	17.67	16.93	19.61	19.3	32.54	35.88	23.42	19.56	24.89	26.57	46.8	46.94	42.61	20.53	31.58	36.18	33.34
Tec	37.31	37.06	38.22	37.09	36.81	33.18	36.77	35.82	34.01	38.74	36.36	23.06	24.87	16.28	19.09	18.66	22.47	25.12	23.11	25.43	25.23	19.02	19.29	23.41	23.38	26.44	25.64	25.67	19.09	21.41	21.47	21.76
Tecpr1	10.04	8.99	10.11	9.6	10.05	8.54	8.78	9.81	10	9.3	8.71	5.7	5.96	4.77	4.99	4.98	5.32	4.97	6.11	5.78	5.47	5.06	4.87	4.98	4.87	6.58	7.2	6.6	5.91	5.95	5.87	5.5
Tfb1m	3.63	2.91	3.4	3.44	3.19	3.86	3.71	3.7	4.21	3.77	3.62	6.6	5.91	6.8	7.43	7.88	5.96	7.39	6.61	6.64	6.22	7.6	6.8	6.07	5.19	5.73	4.47	5.67	6.74	5.88	6.08	5.96
Tgtp1	0.14	0.14	0.2	0.17	0.2	0.37	0.11	0.19	0.14	0.11	0.21	1.66	2.5	0.4	0.71	0.66	0.88	1.22	1.65	5.71	5.76	1.23	0.67	2.41	2.12	14.38	14.37	13.03	0.9	4.62	7.28	3.93
Tgtp2	0.18	0.21	0.29	0.28	0.29	0.57	0.21	0.27	0.22	0.26	0.26	2.03	3.08	0.47	0.88	0.96	1.1	1.6	1.93	7.64	7.48	1.44	0.96	3.1	2.79	18.68	19.1	16.92	1.19	6.01	9.27	5.46
Themis2	19.23	18.87	19.96	19.54	17.75	16.14	16.02	15.1	20.03	17.47	18.29	27.96	30.38	18.47	19.53	17.65	25.19	25.28	24.65	39.69	39.26	20.79	19.81	29.36	27.2	55.92	57.38	55.04	24.29	37.33	44.09	35.85
Timeless	6.67	7.77	6.36	6.48	7.83	6.11	6.62	5.96	5.62	6.3	5.18	11.22	12.07	9.96	10.08	9.03	11.3	10.66	11.15	11.33	11.64	10.42	10.05	10.63	10.57	14.64	14.53	13.26	11.92	12.67	13.39	11.12
Tle3	6.12	5.91	6.44	6.54	5.92	4.43	5.26	5.27	6.05	6.12	5.68	3.97	3.91	2.83	3.06	2.95	2.72	3.12	3.38	3.58	3.57	2.75	3.2	2.9	2.73	3.02	3.37	3.07	3.6	2.92	2.84	2.83
Tlr3	2.73	2.36	2.55	2.38	2.36	2.31	2.38	2.53	2.68	2.16	2.85	3.61	4.88	2.26	2.99	2.12	3.06	3.39	4.2	9.06	9.09	4.19	3.14	5.37	5.35	16.94	16.13	14.81	4.59	9.02	10.15	7.99
Tlr7	28.71	30.05	28.97	28.58	28.84	25.01	29.49	28.05	27.76	29.67	27.25	20.85	22.1	16.68	17.15	18.02	22.6	23.83	22.94	34.94	33.84	17.73	19.46	26.28	28.51	61.16	58.31	56.59	28.89	39.45	41.33	39.58
Tlr8	16.76	15.3	15.03	15.04	14.23	12.83	13.23	12.18	15.95	16.26	16.26	15.89	19.26	11.74	11.46	12.12	16.37	16.79	15.99	25.65	28.4	12.57	13.59	18.97	19.92	56.96	55.16	51.61	27.69	37.44	37.58	35.82
Tlr9	4.17	4.91	4.46	4.76	5.13	4.09	4.14	4.77	5.13	4.19	4.13	2.43	2.94	2.33	2.41	1.76	2.62	3	2.79	4.49	4.61	2.56	2.64	4.09	3.45	8.15	9.58	7.67	3.72	4.71	4.93	4.76
Tm4sf19	1.18	1.4	1.59	1.48	2.15	1.36	1.1	1.31	1.94	1.28	1.36	2.55	2.34	1.78	1.88	2.65	2.45	2.31	1.81	3.15	2.33	2.72	2.22	2.79	2.87	3.43	3.52	2.19	3	3.19	2.22	2.81
Tmc8	2.43	2.3	2.43	2.02	2.12	2.01	1.95	1.92	2.34	2.41	1.52	1.18	0.97	1.22	0.92	0.93	1.05	0.97	1.19	0.88	1.02	0.95	1.01	0.93	1.49	1.08	0.89	0.92	0.97	0.68	1.02	0.81
Tmcc3	2.79	2.68	2.62	2.68	2.9	2.81	2.34	2.51	2.55	2.83	2.74	2.02	2.45	1.69	1.67	1.5	2.04	1.94	2.18	3.9	3.52	1.2	1.79	2.45	2.6	6.88	6.29	6.33	2.45	3.8	4.21	3.31
Tmco4	5.3	4.61	5.24	4.85	5.34	4.59	4.85	4.49	4.78	4.83	4.39	2.55	2.88	2.23	2.52	2.08	2.1	2.88	2.56	2.52	3.01	2.35	1.96	2.28	2.52	3.45	3.82	3.23	2.81	2.99	3.09	3.18
Tmeff1	9.91	9.19	10.52	9.76	9.05	9.96	10.1	11.6	9.5	10.63	11.45	20.09	19.49	22.56	23.41	25.64	21.33	21.84	18.32	14.49	14.03	17.04	17.26	14.93	16.72	10.76	8	9.68	9.02	11.34	11.19	10.2
Tmem107	2.51	2.02	2.39	3.6	3.06	2.76	3.37	2.19	2.34	3.04	2.63	5.02	4.86	4.61	5.37	5.34	5.65	4.86	4.06	4.54	5.48	6.04	6.67	6.53	5.8	5.27	5.53	4.66	5.38	4.99	6.68	3.18
Tmem132a	7.97	8.21	8.79	8.08	8.8	7.5	7.88	8.13	9.06	8.59	7.26	6.08	6.6	6.33	6.65	4.59	5.57	5.21	6.45	6.08	6.17	4.86	5.14	5.39	4.77	5.79	5.38	5.46	3.84	4.96	3.51	3.4
Tmem154	2.91	2.25	2.41	2.6	2.69	2.36	2.02	2.4	2.78	2.85	2.48	0.9	1.02	0.92	0.9	0.76	0.99	1.3	0.85	1.22	1.1	0.92	0.71	1.36	1.22	1.09	1.11	1.14	0.92	1.11	0.83	0.93
Tmem158	4.54	3.51	3.35	3.19	3.82	2.68	3.64	3.24	3.32	4.72	2.94	2.55	1.62	1.74	1.93	1.69	1.53	2.13	1.55	1.29	1.41	1.7	1.49	1.29	1.24	1.5	1.52	1.7	1.62	1.51	1.03	1.12
Tmem163	2.17	1.76	1.85	2.19	1.53	1.75	1.55	2.19	1.82	2.02	2.01	4.1	3.83	4.97	3.92	4.98	4.85	4.19	4.6	3.23	3.54	3.39	3.95	2.76	3.34	1.67	1.66	1.91	2.48	1.81	2.04	1.78
Tmem221	1.87	1.67	2.38	2.61	2.01	1.24	1.84	2.27	2.58	1.6	2.15	2.72	2.84	2.09	2.49	2.16	2.81	2.03	2.87	3.69	3.48	2.34	2.36	2.26	2.84	5.25	5.17	5.1	2.77	3.91	4.4	2.89
Tmem229b	12.48	13.61	12.54	12.75	14.5	11.74	11.98	12.02	12.01	13.16	12.02	14.32	15.51	11.5	12.46	11.97	13.58	13.73	13.24	19.07	20.12	13.34	12.26	16.04	16.19	25.87	24.05	24.55	13.52	20.09	20.93	17.32
Tmem26	3.78	2.9	3.2	3.5	2.95	4.3	3.99	4.29	2.99	3.73	4.03	8.26	8.23	10.57	9.75	11	9.57	9.22	9.23	8.24	8.34	10.64	9.69	8.15	9.22	6.47	6.71	6.73	6.52	7.14	7.33	7.1
Tmem37	40.46	38.43	38.82	33.46	35.96	28.91	33	30.1	33.47	33.63	32.53	16.87	16.01	11.81	12.71	10.95	16.9	16.05	15.37	21.58	19.52	9.56	14.31	20.38	14.44	24.89	22.34	23.75	21.99	21.27	22.43	22.09
Tmem8	14.05	14.38	14.47	14.94	14.77	12.71	14.17	12.96	12.69	12.75	13.98	8.04	8.25	6.56	6.64	7.85	8.92	8.23	8.41	8.66	8.62	6.34	6.04	8.75	7.37	11.22	9.78	10.36	9.13	9.97	8.78	8.19
Tmem86a	12.26	12.97	12.16	11.48	10.95	9.21	9.97	9.55	10.8	9.51	11.09	13.86	13.61	11.02	10.44	9.7	12.21	12.76	14.4	16.2	17.42	13.31	11.4	14.61	13.95	28.9	28.49	27.36	19.36	21.2	21.76	18.59
Tnf	45.23	57.44	54.1	74.94	80.1	135.47	123.99	126.22	80.98	85.23	85.81	52.39	51.56	111.8	111.67	117.38	72.56	73.6	69.11	41.32	37.58	70.57	60.84	57.33	62.17	26.46	27.67	24.08	22.46	36.34	34.26	38.7
Tnfaip2	43.24	55.22	52.35	65.68	65.62	104.79	107.67	110.96	53.23	51.91	52.19	40.2	38.8	84.27	81.46	86.22	48.43	49.81	51.44	41.14	42.68	79.98	71.61	55.74	63.22	33.14	35.17	34.4	53.21	59.78	58.71	52.3
Tnfaip8l1	3.2	3.87	3.77	3.27	3.03	3.25	3.28	3.01	3.31	3.56	3.15	2.55	2.89	2.33	2.97	2.58	2.79	3.18	2.46	2.69	2.15	1.57	1.83	2.33	1.68	1.9	2.53	2.35	3.17	2.08	2.37	2.7
Tnfaip8l2	23.71	23.49	25.62	22.82	23.11	16.28	17.38	18.71	24.98	23.88	24.98	24.98	25.68	17.84	19.58	17.87	24.21	26.2	24.81	31.53	35.44	22.62	25.1	30.17	25.88	50.78	52.42	48.13	41.11	45.77	47.2	39.34
Tnfrsf12a	43.14	41.86	47.11	41.68	43.32	39.41	40.35	41.7	48.27	43.65	45.64	30.69	29.96	27.51	31.66	26.88	28.35	24.73	28.69	22.86	21.06	24.16	24.09	20.51	21.75	13.46	14.26	13.61	14.89	14.64	13.71	15.03
Tnfrsf14	3.29	3.25	4.34	3.7	3.36	4.09	4.33	3.89	3.88	4.78	3.65	4.94	4.84	3.83	3.71	5.16	4.19	2.74	3.93	5.41	7.27	7.88	6.69	6.3	5.95	9.74	10.75	12.25	8.3	9.01	10.32	10.4
Tnfrsf26	5	3.38	4.89	3.84	3.75	3.87	3.72	4.22	3.48	3.35	4.42	1.87	2.13	1.53	1.89	1.85	2.24	1.97	1.92	2.19	2.38	1.7	1.89	2.13	2.17	2.76	2.39	2.59	2.71	2.14	2.92	2.82
Tnfsf10	0.28	0.34	0.25	0.31	0.25	0.36	0.3	0.24	0.24	0.22	0.25	1.28	1.58	0.38	0.51	0.59	0.7	0.69	1.16	2.95	2.91	0.7	0.42	1.29	1.25	5.59	5.83	5.76	0.49	2.09	3.95	1.93
Tnks1bp1	2.07	2.24	2.4	2.47	2.6	2.39	2.2	2.43	2.49	2.64	2.65	1.27	1.25	1.03	0.91	1.11	1.14	1.23	1.05	1.34	1.33	1.09	1.35	1.11	1.26	1.76	1.55	1.39	1.38	1.34	1.26	1.13
Tns1	3.64	4.17	3.89	3.63	4.2	3.8	3.43	3.31	3.86	3.79	3.49	1.29	1.16	0.92	1.12	1.04	1.02	1.07	1.14	1.26	1.3	0.81	1.08	1.34	1.13	1.46	1.82	1.75	1.73	1.45	1.56	1.58
Tor1aip1	47.14	48.61	47.99	45.18	46.05	42.29	45.92	43.83	42.92	43.83	44.83	52.36	57.13	43.53	44.14	46.28	50.73	51.97	52.28	75.55	76.71	47.68	44.5	56.75	60.83	92.19	92.28	88.96	46.61	68.2	73.39	70.58
Tor1aip2	54.62	55.3	52.99	53.13	52.63	51.24	55	52.76	49.07	51.42	52.77	63.37	71.57	52.71	56.26	55.98	60.16	61.89	63.36	99.23	104.61	64.81	59.58	77.67	82.5	134.33	134.88	125.35	65.74	101.39	110.96	98.41
Tor3a	24.17	24.43	23.52	24.33	25.52	26.92	28.26	28.41	24.28	25.41	24.43	39.5	47.46	30.94	33.02	31.61	32.72	34.03	37.89	68.4	74.76	39.27	35.65	50.36	51.8	114.24	111.18	102.91	35.04	70.06	80.44	63.22
Tpgs1	7.92	5.12	7.81	7.31	6.57	4.52	4	4.88	10.62	7.33	4.19	13.61	11.85	10.73	12.3	5.71	7.49	7.43	13.45	14.83	13.84	4.05	11.88	8.57	5.73	13.28	13.36	13.47	14.12	13.12	9.36	7.39
Tpst1	9.88	10.84	11.38	12.4	11.99	10.53	10.84	11.22	10.95	10.25	10.98	18.24	20.72	16.51	15.95	15.03	17.89	18.16	17.59	27.46	29.25	18.06	14.12	19.1	20.5	42.1	37.81	39.1	14.13	23.49	28.11	21.38
Tra2a	29.34	28.94	30.86	27.32	25.55	30.97	29.7	33	28.46	28.77	31.14	69.86	70.49	73.31	75.42	74.2	72.4	76.18	70.12	51.23	53.35	54.44	57.34	51.5	54.08	53.75	52.14	51.02	56.43	54.54	60.24	59.9
Traf1	6.16	6.06	7.63	9.5	8.67	15.45	17.06	17.71	6.26	6.03	7.61	9.31	9.54	22.83	20.87	24.31	10.8	9.81	10.61	12.72	11.45	24.07	19.62	15.31	17.53	8.88	10.61	8.89	10.89	14.29	14.87	13.98
Trafd1	20.19	20.81	19.59	22.15	22.17	20.34	20.71	21.57	19.72	19.47	20.61	40.1	46.08	25	25.71	27.48	30.14	34.18	37.9	78.35	88.6	38	28.58	53.28	55.54	145.33	137.19	126.2	37.99	85.24	102.08	85.83
Trem1	2.7	2.74	2.9	3.82	3.59	4.37	3.82	4.04	3.8	3.64	3.46	2.29	2.2	3.13	2.44	3.17	1.88	2.42	1.89	2.51	2.41	4.05	3.92	2.91	2.83	1.21	1.21	1.34	1.95	1.82	1.87	1.81
Treml4	1.72	2.28	2.56	2.21	1.88	2.82	2.04	2.67	1.72	1.92	1.96	1.89	2.49	3.27	2.92	3	1.8	2.36	2.58	3.33	2.22	7.91	4.76	4.36	4.65	2.37	2.53	3.48	6.04	5.09	4.36	4.47
Trex1	25.2	26.71	24.13	30.13	29.27	28.5	31.36	31.97	26.39	25.47	28.49	55.22	68	35.97	38.29	44.1	40.8	50.68	54.52	106.25	112.81	61.77	40.23	73.94	74.79	167.32	155.4	148.55	56.56	119.19	128.93	110.5
Trib1	18.08	18.35	19	19.74	18.53	19.31	18.41	18.62	18.25	20.12	18.78	13.01	12.98	14.27	13.93	12.85	12.64	12.83	12.23	10.88	10.49	9.79	12.8	11.27	11.53	6.3	6.8	6.62	8.15	7.78	7.74	7.65
Trim12a	5.65	6.59	6.13	6.25	5.89	6.76	6.44	6.37	7.79	5.68	5.84	9.33	12.4	7.41	7.71	7.18	9.56	9.28	8.94	18.54	21.03	9.48	6.17	13.42	15.76	29.92	26.95	26.89	10.27	20.7	24.31	19.37
Trim12c	6.94	7.95	7.33	6.85	7.18	7.49	7.23	7.53	7.35	6.28	7.65	12.72	15.67	8.97	8.91	10.38	10.63	11.48	12.6	25.42	28.13	13.59	11.8	18.26	19.53	38.74	36.12	36.42	14.39	28.02	32.21	29.46
Trim14	7	5.77	6.54	5.83	6.67	6.39	5.31	6.62	6.14	6.75	6.36	11.8	14.02	8.77	8.89	8.25	9.7	10.16	12.43	19.96	20.62	10.17	10.26	14.01	16.89	29.79	28.22	27.53	13.05	20.05	19.84	20.93
Trim21	7.72	7.9	7.3	7.3	6.45	6.65	7.11	6.17	6.35	6.66	6.11	10.82	13.93	6.22	6.77	7.29	9.71	9.1	10.5	19.13	20.98	9.76	8.78	13.76	14.46	30.5	33.31	30.04	11.7	19.69	25.95	19.86
Trim25	25.89	26.64	24.69	24.27	24.63	24.1	23.31	23.77	24.55	22.99	24.66	38.12	42.49	29.17	29.63	30.05	33.1	36.08	39.22	50.8	54.35	40.83	37.2	42.74	45.95	59.83	59.17	59.61	39.83	52.93	55.94	51.61
Trim30a	13.08	13.5	12.26	13.61	13.26	12.83	12.88	13.19	13.27	12.83	13.35	25.2	36	14.22	17.47	18.55	18.99	21.99	25.73	73.65	81.98	27.62	19.91	46.91	51.79	126.2	123.88	118.38	29.44	77.03	89.28	75.5
Trim30d	2.72	3.7	2.93	3.04	3.17	3.35	3.02	3.02	3.08	2.98	3.06	7	10.25	3.3	3.92	4.06	4.78	6.12	6.41	18.84	23.43	7.55	4.48	11.2	13.15	40.26	37.35	36.1	6.49	20.22	25.12	21.09
Trim34a	3.5	3.9	3.44	3.65	3.39	3.35	2.61	3.44	3.54	3.4	3.83	7.26	8.82	3.77	4.34	5.1	5.24	5.91	6.78	16.35	17.8	6.18	4.46	11.54	12.24	30.57	29.81	27.38	7.42	19.78	20.69	18.93
Trim34b	1.39	1.74	1.63	1.6	2.18	1.72	1.61	1.67	2.09	1.71	2.05	3.72	5.08	1.7	2.32	2.68	2.64	3.04	3.52	8.97	9.63	4.73	2.05	5.56	5.61	15.59	14.89	13.7	3.67	9.56	10.52	10.26
Trmt61a	17.33	17.5	21.01	18.05	18.06	17.54	17.87	19.64	18.98	19.8	17.11	19.31	16.6	20.75	20.74	18.99	17.37	18.2	17.06	12.91	13.33	15.67	16.04	15.04	14.08	7.16	8.27	8.3	10.89	10.28	9.32	8.97
Tshz1	10.02	9.68	9.03	9.92	9.73	10.15	9.59	10.86	8.99	9.46	8.98	7.58	7.41	8.31	8.04	7.91	7.31	7.21	6.77	6.12	5.86	7.28	7.53	6.08	6.24	4.05	3.73	3.86	5.96	5.44	4.56	5.38
Tspan13	6.23	7.89	6.59	7.46	6.85	6.92	6.53	6.96	6.32	7.17	6.34	3.98	3.72	3.16	3.7	3.92	3.79	3.79	4.1	4.92	4.36	2.58	2.93	4.51	4.58	5.06	5.23	5.47	4.35	5.11	5.03	4.95
Ttc39b	2.52	2.25	2.87	2.59	2.33	2.65	2.75	2.63	2.57	2.63	2.73	1.43	1.35	1.15	1.21	1.31	1.33	1.21	1.14	1.78	1.67	1.53	1.52	1.59	1.59	1.98	1.88	1.8	1.68	1.61	1.76	1.91
Ttc39c	8.15	8.06	7.75	8.52	8.45	8.86	7.61	8.56	7.65	9.06	9.2	4.9	4.45	4.31	3.22	3.92	5.11	3.69	3.95	4.62	5.27	4.07	4	5.32	4.85	5.36	4.33	5.08	4.96	4.19	4.91	4.77
Tubb2a	90.58	91.67	85.35	88.54	88.62	77.25	85.47	84.49	89.63	88.63	88.31	42.68	42.04	36.91	39.11	35.32	38.9	44.25	41.9	40.85	39.66	37.35	39.81	39.91	36.64	42.09	40.36	42.58	47.1	40.37	43.39	40.96
Tubb2b	23.73	24.09	23.55	23.81	23.47	18.99	20.56	21.36	25.58	23.49	22.11	12.52	11.8	10.02	11.4	9.09	10.24	11.89	12.97	11.37	12.01	11.36	11.1	10.65	9.54	11.8	11.06	11.02	12.65	11.81	11.49	9.75
Tubb6	198.96	205.47	210.04	205.23	205.91	203.04	207.92	212.05	206.24	213.26	202.6	157.82	147.29	165.54	169.01	157.38	156.23	154.18	149.02	123.8	123.35	130.9	137.66	121.33	121.37	77.08	81.11	75.49	102.04	89.45	85.54	87.5
Txnrd1	259.05	239.65	242.2	234.93	226.48	256.96	248.38	264.06	220.73	231.02	235.47	182.89	173.3	212.77	199.63	217.18	182.63	191.94	178.97	162.4	163.51	213.05	217.14	176.35	191.94	96.19	94.82	99.26	156.1	136.83	138.08	140.36
Txnrd3	3.71	3.28	4.22	3.4	4.35	3.28	4.09	4.36	2.92	3.58	3.93	2.27	2.2	2.39	2.71	2.32	1.85	2.27	1.57	2.11	1.71	1.99	1.89	1.81	1.72	1.32	1.14	1.41	1.93	2.03	1.17	1.71
Uba7	6.54	8.23	7.34	7.11	8.09	7.68	6.69	7.23	7.76	7.26	8.12	11.3	14.24	8.94	8.84	10.38	9.73	10.9	11.77	26.93	27.61	15.12	10.62	18.39	18.18	58.02	58.91	54.94	15.53	31.23	36.17	31.67
Ubash3b	45.2	43.09	46.27	43.51	41.68	38.31	39.88	40.27	43.15	45.32	46.28	32.99	33.87	31.61	30.15	30.64	31.42	32.66	30.44	28	28.38	28.83	27.87	26.36	26.4	19.11	20.38	19.51	23.09	21.26	19.19	20.28
Ube2l6	31.67	34.18	30.2	29.97	30.13	32.24	33.47	33.62	31.32	31.35	31.82	37.57	46.18	29.98	31.73	33.72	36.24	36.69	37.56	87.77	91.64	48.93	34.67	62.56	61.64	200.26	193.97	185.25	44.71	100.94	123.2	96.77
Ulbp1	12.93	14.43	13.39	14.55	14.26	15.02	15.82	12.6	12.48	14.33	13.54	10.97	11.22	10.51	11.13	11.05	11.83	10.97	10.77	9.65	9.6	10.98	12.56	11.94	10.95	5.86	5.78	7.48	13.02	9.51	9.41	9.7
Ung	5.91	6.1	7.32	5.96	6.13	5.21	6.19	5.73	4.85	6.48	5.04	14.39	15.21	14.33	14.45	14.75	15.13	15.71	15	11.49	9.49	12.11	12.23	11.63	11.88	7.78	8.94	8.17	13.94	10.71	10.35	9.79
Uros	2.57	2.67	2.51	2.04	3.03	3.43	2.99	3.06	2.84	3.03	3.77	4.47	5.51	4.79	5.89	5.83	5.77	5.79	5.24	4.91	5.23	6.82	4.96	4.93	5.59	4.71	4.53	4.49	4.66	5.46	5.37	5.52
Usb1	16.34	14.35	16.5	14.49	15.15	13.52	15.14	14.75	13.78	13.29	13.66	14.95	16.89	13.33	14.3	13.64	14.02	14.02	15.82	22.64	23.64	14.87	13.27	17.97	17.46	31.64	32.15	29.18	15.8	22.94	26.19	21.86
Usp18	1.8	1.95	1.66	1.77	2.01	2.8	2.07	2.63	2.06	2.69	2.25	21.21	28.21	5.14	5.97	7.6	11.4	14.36	16.92	55.62	59.6	13.14	5.86	26.57	26.11	102.85	101.56	88.23	9.84	48.04	66.82	44.96
Usp2	7.68	7.7	7.7	7.17	7.69	5.41	6.18	6.58	8.62	8.05	8.13	4.64	5.68	4.18	3.75	3.35	5.11	4.62	5.09	4.85	4.96	3.12	3.94	4.99	3.58	4.97	4.76	4.86	4.26	3.98	4.08	3.9
Vav3	15.91	17.85	17.37	16.01	16.75	16.49	16.71	15.72	13.62	16.61	14.69	6.37	7.78	5.2	4.99	6.21	7.17	6.68	6.91	8.96	9.05	7.42	7.44	8.84	8.93	8.61	9.34	10.48	9.82	9.06	9.71	9.39
Vcl	15.41	15.09	14.18	14.26	15.11	14.35	13.94	13.9	14.55	13.72	13.37	8.41	8.02	8.83	8.69	8.63	8.36	8.23	8.27	7.58	7.68	7.56	8.8	8.39	8.76	5.84	5.84	6.25	7.56	7.39	6.21	7.27
Vegfc	1.27	1.63	1.4	1.47	1.85	1.59	2.32	2.46	1.4	1.54	2.1	5.66	5.61	7.84	7.83	8.35	5.13	5.34	5.46	3.97	5.43	10.58	8.56	5.09	6.66	4.19	4.39	4.79	6.43	5.65	6.65	5.91
Vopp1	18.36	18.74	18.41	16.59	17.93	15.7	18.07	17.29	15.3	17.79	17.55	11.37	10.54	10.67	11.02	11.27	12.1	12.83	10.97	12.31	10.83	11.01	11.49	11.92	11.9	7.93	9.03	9.05	12.53	10.09	9.53	10.49
Wdpcp	1.35	1.7	0.94	1.13	1.41	1.65	1.42	1.16	1.07	1.54	1.2	2.7	2.11	2.33	2.99	2.12	2.49	3.03	2.6	2.18	1.89	1.28	2.16	2.28	2.11	2.06	1.92	1.88	1.78	2.04	1.86	1.74
Wdr54	1.75	1.59	1.85	2.14	1.98	1.71	2	2.03	1.72	1.37	2.53	3.44	3.51	4.37	2.46	3.59	3.91	4.33	4.11	2.14	2.57	1.71	2.7	2.89	2.6	2.09	2.27	1.85	2.43	1.87	2.2	2.47
Wdr92	8.25	7.22	7.66	7.91	7.94	9.93	9.59	10.09	7.83	8.2	8.09	10.8	10.29	16.89	15.98	16.96	10.65	12.55	9.95	10.34	10.29	20.41	19.48	12.52	13.62	9.88	10.1	10.6	13.52	12.82	13.46	11.43
Wipi1	12.34	13.68	13.89	13.17	12.83	10.9	12.74	11.04	12.54	11.98	11.48	7.84	7.6	6.01	7.07	6.33	8.6	9.64	7.31	7.15	6.85	5.82	5.73	6.73	6.18	8.4	9.86	7.84	8.3	7.83	6.91	6.65
Wtip	2.54	2.55	3.02	2.34	2.25	1.85	1.85	2.17	2.48	2.5	2.2	2.16	1.48	1.52	1.75	1.52	1.48	1.6	1.73	1.59	1.49	1.79	1.53	1.61	1.23	1.64	0.93	1.37	1.51	1.59	1.17	1.02
Wwc2	11.37	10.25	10.67	11.8	10.33	9.08	10.19	9.9	10.69	9.78	11.09	6.46	6.36	5.92	5.5	5.25	5.96	6.71	6.01	5.88	5.66	5.8	5.94	5.52	5.83	5.28	5.16	5.44	5.97	5.42	5.38	4.91
Xaf1	3.06	3.18	2.98	3.74	3.84	3.13	3.47	3.4	3.3	3.61	3.3	7.94	9.91	4.13	4.44	4.94	4.98	6.97	7.6	19.44	21.38	6.51	5.13	12.12	14.18	35.05	34.31	33.71	7.95	22.16	26.27	20.7
Ydjc	5.9	5.46	5.17	5.26	5.76	4.23	4.27	4.82	5.89	5.54	3.61	13	11.12	12.67	12.74	12	9.99	10.51	12.32	9.2	8.64	7.92	10.89	8.65	6.49	4.94	5.09	5.16	9.49	8.49	6.23	6.7
Zadh2	16.89	14.93	15.46	14.51	15.88	14.16	16.23	16.86	14.94	16.59	15.63	10.87	10.74	11.16	11.47	11.95	10.82	10.9	11.38	9.55	9.52	12.25	11.35	11.01	10.14	6.95	7.43	7.65	11.43	9.64	9.2	8.62
Zbp1	3.02	2.76	2.02	3.54	3.03	2.78	3.23	2.31	1.94	2.16	3.26	5.89	9.7	1.87	4.33	3.43	3.62	3.84	7.37	32.77	32.31	5.23	3.1	13.76	19.27	117.44	121.48	103.45	8.86	43.83	53.41	34.81
Zbtb32	0.74	0.58	0.37	0.57	0.49	0.73	0.62	0.88	0.75	0.41	0.75	1.04	0.91	0.97	1.16	0.94	0.96	0.75	1.22	1.77	1.58	1.66	1.51	1.37	1.98	1.34	1.12	1.31	1.51	1.42	2.1	1.56
Zbtb40	1.98	1.65	1.88	1.92	1.83	1.9	1.7	1.97	2.1	1.9	2.01	3.63	3.29	3.08	3.51	2.81	3.18	3.26	3.74	2.78	2.94	4.42	3.23	2.8	2.78	2.78	2.65	2.97	3.02	2.98	2.67	3.11
Zc3h12c	8.2	9.15	8.96	10.5	10.63	14.15	14.28	12.87	9.25	9.21	8.51	7.56	7.14	11.9	11.02	12.31	7.45	8.32	7.94	5.34	5.57	9.85	9.51	7.22	7.32	3.8	4.09	3.77	5.2	5.29	5.72	5.59
Zc3hav1	24.75	24.83	26.06	24.81	25.75	23.53	24.32	25.14	22.29	21.96	23.11	34.97	37.87	30.98	29.22	29.57	31.82	32.68	35.22	48.54	49.4	36.2	35.61	40.24	42.78	52.89	53.33	51.39	35.76	44.78	48.65	46.41
Zcchc2	6.11	5	5.87	5.28	5.37	5.33	4.77	4.96	5.38	5.54	5.8	8.25	8.49	6.33	6.39	6.73	7.23	7.3	7.54	10.62	10.02	6.9	6.73	8.67	7.84	11.52	11.55	10.73	6.51	9.6	9.53	9.5
Zcchc24	5.7	6.16	5.84	5.9	5.7	4.89	5.05	4.95	5.35	5.94	5.69	3.3	3.44	2.46	2.58	2.13	3.42	3.11	3.29	4.48	4.51	2.51	2.86	3.86	3.83	5.33	5.26	4.6	4.31	4.03	4.31	4.61
Zdhhc14	11.91	13.01	13.42	12.11	12.89	11.18	10.81	10.39	12.16	11.78	10.05	6.66	6.47	5.83	5.65	5.63	6.04	5.82	5.78	9.18	7.78	6.74	6.26	6.22	6.3	8.49	8.91	8.5	9.55	8.69	8.09	7.19
Zfp619	0.72	1.01	1.05	0.83	0.99	1.13	0.76	0.85	0.92	1.16	1.11	1.22	1.18	0.93	0.97	1.04	1.12	0.87	0.99	1.47	1.27	1.36	1.23	1.29	1.46	1.85	1.77	1.62	1.27	1.19	1.63	1.65
Zfp704	1.88	1.96	1.93	1.95	1.91	1.95	1.79	1.68	1.75	1.98	1.95	0.7	0.65	0.63	0.61	0.54	0.76	0.7	0.73	0.73	0.73	0.82	0.74	0.83	0.8	0.92	0.83	0.87	1.04	0.75	0.84	0.97
Zfp771	1.57	0.8	1.63	2.33	2.3	1.22	1.32	1.47	2.7	2.76	1.39	2.96	3.61	3.05	3.25	1.43	2.02	1.93	3.41	2.45	2.65	1.52	2.44	1.5	2.08	1.79	2.05	2.56	3.08	3.27	2.13	1.73
Zfp808	2.23	1.88	1.97	2.44	2.06	2.13	1.98	1.91	2.43	2.24	2.35	3.23	3.78	3.77	3.22	3.2	3.54	4	4.22	3.81	3.46	4.17	4.16	3.85	3.21	2.43	2.31	2.73	3.78	2.82	3.12	3.69
Zfp810	3.37	4.19	3.57	3.63	4.04	3.04	2.8	3.01	4.53	3.58	3.36	1.68	2.17	1.53	1.48	1.78	1.96	1.79	1.8	1.83	1.58	1.21	1.51	1.12	1.69	1.65	1.66	1.68	1.59	1.69	1.38	1.79
Zfp934	2.13	1.52	1.98	1.64	1.88	1.95	1.87	1.97	1.88	2.2	2.25	3.44	3.65	3.61	3.75	3.24	3.6	4.25	4.63	3.8	3.35	3.43	4.7	4.29	3.77	2.21	2.46	2.86	3.84	3.3	3.03	3.83
Zfpm1	6.06	6.4	6.46	5.68	6.63	4.41	5.13	5.29	6.33	5.92	5.19	3.62	3.59	3.19	2.74	2.39	3.24	2.56	3.73	4.3	3.61	2.22	3.03	3.24	3.08	3.12	3.32	3.19	2.9	2.81	2.85	2.43
Zfyve28	1.48	1.12	0.99	0.96	1.01	0.96	0.91	0.76	1.41	0.98	1.13	0.85	0.94	0.8	0.83	0.77	1.03	0.86	1.16	1.54	1.7	1.59	1.67	1.48	1.35	2.41	2.41	2.91	2.95	2.6	2.47	2.35
Znfx1	26.23	28.27	26.98	28.02	28.43	27.78	29.97	29.52	27.32	25.87	27.15	40.73	47.03	31.45	31.66	31.94	34.62	37.74	40.25	64.08	67.85	37.14	32.31	45.93	46.88	98.69	99.74	92.3	34.06	63.84	69.73	62.89
Znrf3	2.44	3.21	2.81	2.35	2.8	2.66	2.55	2.83	2.66	2.62	2.95	2.26	2.11	2.14	2.1	1.87	1.89	1.66	1.55	2.01	1.7	1.59	1.47	1.82	1.72	1.4	1.37	1.23	1.38	1.19	1.3	1.37
Zranb3	11.35	11.15	10.13	11.01	10.35	8.9	9.4	8.88	9.62	11.11	11.93	9.44	10.11	8.41	7.21	7.34	11.14	10.38	9.49	8.48	8.82	5	5.83	8.09	8.53	9.06	9.17	9.02	6.77	6.33	7.12	7.22
Zrsr1	7.81	6.56	5.41	5.37	5.79	11.1	10.43	9.5	2.96	11.85	5.21	11.68	11.06	15.27	14.29	7.42	16.08	21.45	36.19	13.59	9.21	7.33	22.91	5.68	8.52	4.21	4.22	6.94	4.83	13.41	25.16	17.67
Zufsp	4.86	3.91	4.4	4.61	4.97	4.86	5.21	4.82	4.36	4.66	4.48	7.99	8.17	4.88	5.41	6.31	6.32	6.08	6.73	11.39	11.52	7.38	6.24	8.27	7.68	13.1	13.01	13.9	5.23	9.85	11.72	10.07
Zyx	65.62	62.8	62.12	61.91	63.83	56.01	56.6	61.83	65.7	65.27	62.16	34.43	32.17	28.43	29.01	25.99	31.6	31.2	32.72	31.51	29.12	21.63	23.9	25.93	26.22	26.14	27.13	26.06	24.81	23.07	24.81	24.68
